# Supplementary material for: Biological evaluation of novel amidino substituted coumarin-benzazole hybrids as promising therapeutic agents
Source: Royal Society of Chemistry journal article supplement (doi:10.1039/d3md00055a), 2023-01-01
Supplement: d3md00055a1.pdf [file d3md00055a1.pdf]

## Biological evaluation of novel amidino substituted coumarin-benzazole hybrids as promising therapeutic agents

Anja Beč,<sup>1</sup> Livio Racané,<sup>2</sup> Lucija Žonja,<sup>1</sup> Leentje Persoons<sup>3</sup>, Dirk Daelemans<sup>3</sup>, Kristina Starčević<sup>4</sup>,  
Robert Vianello<sup>5</sup> and Marijana Hranjec<sup>1\*</sup>

<sup>1</sup> Department of Organic Chemistry, Faculty of Chemical Engineering and Technology, University of Zagreb, Marulićev trg 19, HR-10000 Zagreb, Croatia

<sup>2</sup> Department of Applied Chemistry, Faculty of Textile Technology, University of Zagreb, Prilaz baruna Filipovića 28a, 10000 Zagreb, Croatia

<sup>3</sup> KU Leuven, Department of Microbiology, Immunology and Transplantation, Laboratory of Virology and Chemotherapy, Rega Institute, Leuven, Belgium

<sup>4</sup> Department of Chemistry and Biochemistry, Faculty of Veterinary Medicine, University of Zagreb, Heinzelova 55, HR-10000 Zagreb, Croatia

<sup>5</sup> Laboratory for the Computational Design and Synthesis of Functional Materials, Division of Organic Chemistry and Biochemistry, Ruđer Bošković Institute, Zagreb, Croatia

### SUPPORTING INFORMATION

| CONTENT                                                                                                                                       | PAGE    |
|-----------------------------------------------------------------------------------------------------------------------------------------------|---------|
| Experimental biology and computational details                                                                                                | S2–S5   |
| NMR spectra (Figures S1–S20)                                                                                                                  | S6–S15  |
| Cartesian coordinates and total electronic energies for all systems investigated computationally at the (SMD)/B3LYP/6–31+G(d) level of theory | S16–S43 |
| References                                                                                                                                    | S44     |

## **Biology**

### **Cell culture and reference compounds**

Human cancer cells used in this manuscript, namely Capan-1, HCT-116, NCI-H460, LN-229, HL-60, K-562 and Z-138 were acquired from the American Type Culture Collection (ATCC, Manassas, VA, USA), while the DND-41 cell line was purchased from the Deutsche Sammlung von Mikroorganismen und Zellkulturen (DSMZ Leibniz-Institut, Germany). Culture media were purchased from Gibco Life Technologies, USA, and supplemented with 10% fetal bovine serum (HyClone, GE Healthcare Life Sciences, USA). *Vincristine* and *docetaxel*, which were used as reference inhibitors, were purchased from Selleckchem (Munich, Germany). Stock solutions were prepared in DMSO.

### **Proliferation assays**

Adherent cell lines LN-229, HCT-116, NCI-H460 and Capan-1 cells were seeded at a density between 500 and 1500 cells per well, in 384-well tissue culture plates (Greiner). After overnight incubation, cells were treated with seven different concentrations of the test compounds, ranging from 100 to 0.006  $\mu\text{M}$ . Suspension cell lines HL-60, K-562, Z-138 and DND-41 were seeded at densities ranging from 2500 to 5500 cells per well in 384-well culture plates containing the test compounds at the same concentration points. Cells were incubated for 72 hours with compounds and were then analysed using the CellTiter 96<sup>®</sup> AQueous One Solution Cell Proliferation Assay (MTS) reagent (Promega) according to the manufacturer's instructions. Absorbance of the samples was measured at 490 nm using a SpectraMax Plus 384 (Molecular Devices), and OD values were used to calculate the 50% inhibitory concentration ( $\text{IC}_{50}$ ). Compounds were tested in at least two independent experiments.

### **Subcellular distribution of compounds 13 and 18**

Fluorescence microscopy was performed on Hep-2 cells treated with 10  $\mu\text{M}$  of compound **13** or **18** for 3h. The samples were imaged by confocal microscopy on a Leica TCS SP5 confocal microscope (Leica Microsystems), employing a HCX PL APO 63x (NA 1.2) water immersion objective.

### **Toxicity of compounds 13 and 18 to normal cells**

Buffy coat preparations from healthy donors were obtained from the Blood Transfusion Center in Leuven, Belgium. Peripheral blood mononuclear cells (PBMC) were isolated by density gradient centrifugation over Lymphoprep ( $d=1.077 \text{ g/ml}$ ) (Nycomed) and cultured in cell culture medium (DMEM/F12, Gibco Life Technologies, USA) containing 8% FBS. Freshly prepared PBMC were

seeded at 28000 cells per well in 384-well plates containing the test compounds at seven different concentrations ranging from 100  $\mu$ M to 6 nM. For determining the viability of the normal cells after 72 hour treatment, the CellTiter 96<sup>®</sup> AQueous One Solution Cell Proliferation Assay was employed according to the manufacturer's instructions. Absorbance of the samples was measured at 490 nm using a SpectraMax Plus 384 (Molecular Devices), and OD values were used to calculate the 50% inhibitory concentration (IC<sub>50</sub>). Compounds **13** and **18** were tested in two independent experiments, implying PBMC originated from two different healthy donors.

## **Antiviral activity**

### **Host cell lines**

HEL 299 (ATCC CCL-137; human lung fibroblast), Huh-7 (CLS – 300156; human hepatoblastoma), and MDCK (Madin-Darby canine kidney cells; a kind gift from M. Matrosovich, Marburg, Germany) were maintained in Dulbecco's Modified Eagle Medium (DMEM, Gibco Life Technologies) supplemented with 8% heat-inactivated fetal bovine serum (HyClone, GE Healthcare Life Sciences), 0.075% sodium bicarbonate (Gibco Life Technologies) and 1mM sodium pyruvate (Gibco Life Technologies), and maintained at 37°C under 5% CO<sub>2</sub>.

### **Antiviral CPE reduction assays**

Antiviral assays towards herpes simplex virus-1 (HSV-1 KOS), human coronavirus (HCoV-229E and -OC43) and respiratory syncytial virus A in HEL cell cultures, sindbis virus, yellow fever virus, Zika virus and human coronavirus (HCoV-NL63) in Huh-7 cell cultures and influenza A/H1N1 (A/Ned/378/05), influenza A/H3N2 (A/HK/7/87), influenza B (B/Ned/537/05) in MDCK cell cultures were performed.

On the day of the infection, growth medium was aspirated and replaced by serial dilutions of the test compounds. The virus was then added to each well, diluted to obtain a viral input of 100 CCID<sub>50</sub> (CCID<sub>50</sub> being the virus dose that is able to infect 50% of the cell cultures). Mock-treated cultures receiving solely the test compounds were included, to determine the cytotoxicity. After 3 to 7 days of incubation, the virus-induced cytopathogenic effect was measured colorimetrically by the formazan-based MTS cell viability assay (CellTiter 96 AQueous One Solution Cell Proliferation Assay from Promega, Madison, WI), and the antiviral activity was expressed as the 50% effective concentration (EC<sub>50</sub>). In parallel, the 50% cytotoxic concentration (CC<sub>50</sub>) was derived from the mock-

infected cells. The activities were compared with the activities of reference antiviral drugs: remdesivir, ribavirin, zanamivir, rimantadine and brivudine (BVDU).

### **Antioxidative activity**

#### *Determination of the reducing activity of the stable radical 1,1-diphenyl-picrylhydrazyl (DPPH)*

The determination of reducing activity was measured according to the previously reported procedure<sup>32</sup> with modification for the use in a 96-well microplate. Briefly, to solution of DPPH (final concentration 50  $\mu$ M) in absolute ethanol was added equal volume of various concentrations of tested compounds dissolved in DMSO. The assay was carried out in a 96 well microtiter plate. Ethanol and DMSO were used as control solutions according to the previously published experimental procedure.

#### *Determination of Ferric Reducing/Antioxidant Power (FRAP assay).*

The FRAP method was performed according to previously reported procedure with minor modifications for an assay on a 96-well microplate.<sup>32</sup> All results were then expressed as Fe<sup>2+</sup> equivalents (Fe<sup>2+</sup>  $\mu$ mol). All tests were done in triplicate and the results were averaged and presented in Table 3.

#### *Free radical scavenging ability by the use of a stable ABTS radical cation (2,20 azinobis-(3-ethylbenzthiazoline-6-sulphonic acid)*

The total antioxidant activity (TEAC) method (Gulcin et al. 2014) was adjusted for microplate reader. The working solution of ABTS<sup>•+</sup> for standard TEAC assay, was prepared by mixing an ABTS stock solution (7 mM in water) with 2.45 mM potassium persulfate. The mixture was left for 12-16 h at room temperature in the dark to reach a stable oxidative state. Prior to analysis the ABTS<sup>•+</sup> solution was diluted with PBS (pH 7.4) to an absorbance of 0.700 at 734 nm. The mixture of standards and solutions of tested compounds (10 $\mu$ L) with working ABTS<sup>•+</sup> radical cation solution (200  $\mu$ L) were put into each well of the microplate, shake and incubate at room temperature for 5 min. The absorbance at 734 nm was recorded by  $\mu$ Quant (Biotec Inc.). Final concentration of tested compounds was 150 $\mu$ g/ml. Aqueous phosphate buffer solution was used as a control and main calibrating standard. The results of the ABTS<sup>•+</sup> scavenging activity was calculated according to following equation:

$$\text{ABTS (\%)} = \frac{(\text{A}_{\text{control}} - \text{A}_{\text{compound}})}{\text{A}_{\text{control}}} \times 100.$$

## Computational details

As a good compromise between accuracy and feasibility, all geometries were optimized with the density functional theory (DFT) using the B3LYP functional (unrestricted UB3LYP for the radicals), and the 6–31+G(d) basis set followed by the harmonic frequency calculations. Thermal corrections were extracted from the corresponding frequency calculations without scaling factors, while the obtained structures were confirmed as true minima by the absence of imaginary vibrational frequencies. In this way, all reported values correspond to differences in Gibbs free energies obtained at a room temperature (298 K) and a normal pressure (1 atm). To account for the solvation effects, we included the SMD polarizable continuum model with all parameters corresponding to pure ethanol ( $\epsilon = 24.852$ ), in accordance with presented experiments, giving rise to the (SMD)/B3LYP/6–31+G(d) model employed here. The choice of this computational setup was prompted by its success in modeling mechanisms of various antioxidants,<sup>1,2,3,4,5</sup> and in reproducing kinetic and thermodynamic parameters of a variety of organic<sup>6,7</sup> and enzymatic reactions.<sup>8,9</sup> All calculations were performed using the Gaussian 16 software.<sup>10</sup>

According to the literature, there are multiple mechanisms that describe the antioxidative properties of molecules.<sup>11,12,13</sup> Here we evaluated the three most frequent, and usually thermodynamically most preferred antioxidant mechanisms, namely hydrogen atom transfer (HAT), related with the capacity to transfer the hydrogen atom ( $H^\bullet$ ) to a free radical as governed by the M–H bond dissociation energy (BDE), and single electron transfer (SET) related with either ejecting or adding an electron to the system.

All these mechanisms have the same net result, i.e. the formation of corresponding antioxidant radical and are calculated as Gibbs free energies for the following processes:

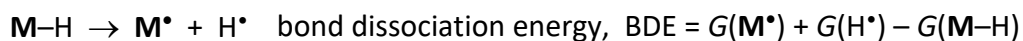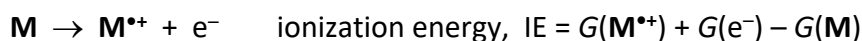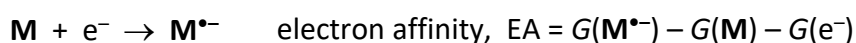

where the Gibbs free energy of an electron in the ethanol solution,  $G(\mathbf{e^-})$ , is taken from the literature.<sup>14</sup>

**Figure S1.**  $^1\text{H}$  NMR spectrum (DMSO- $d_6$ , 400 MHz) of 2-(2-(4-chloro-2-oxo-2H-chromen-3-yl)-1H-benzo[d]imidazol-5-yl)-4,5-dihydro-1H-imidazol-3-ium chloride 7

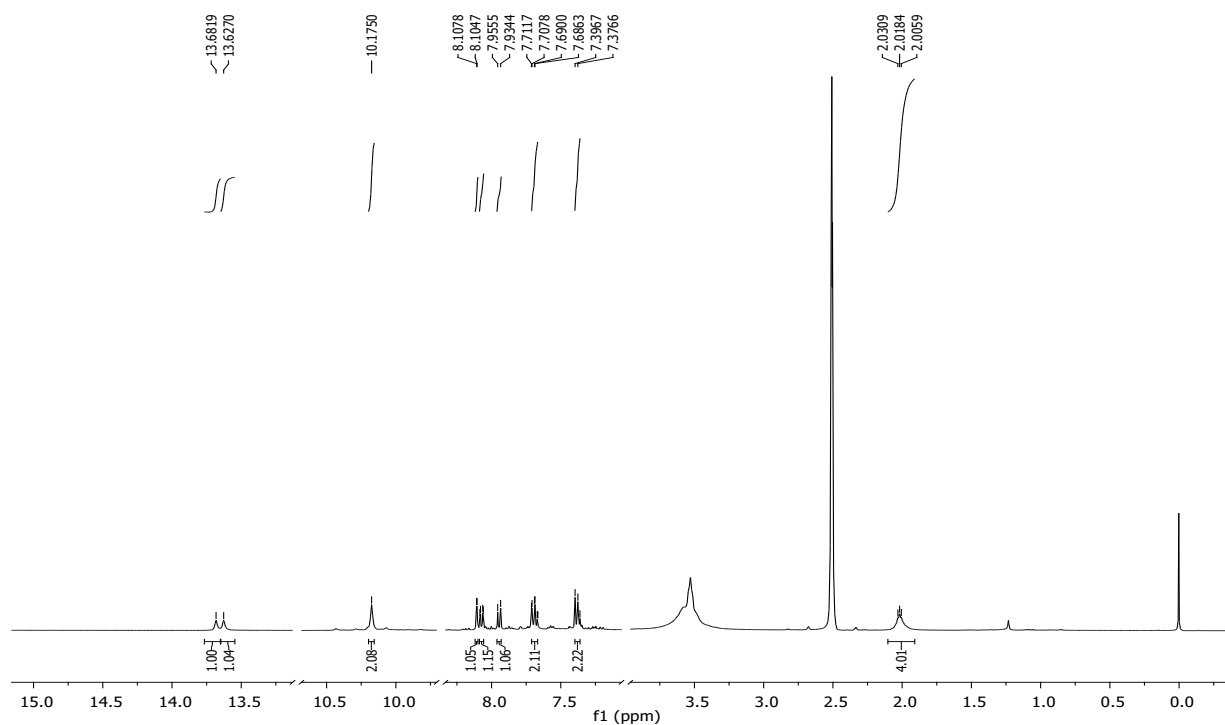

**Figure S2.**  $^{13}\text{C}$  NMR spectrum (DMSO- $d_6$ , 151 MHz) of 2-(2-(4-chloro-2-oxo-2H-chromen-3-yl)-1H-benzo[d]imidazol-5-yl)-4,5-dihydro-1H-imidazol-3-ium chloride 7

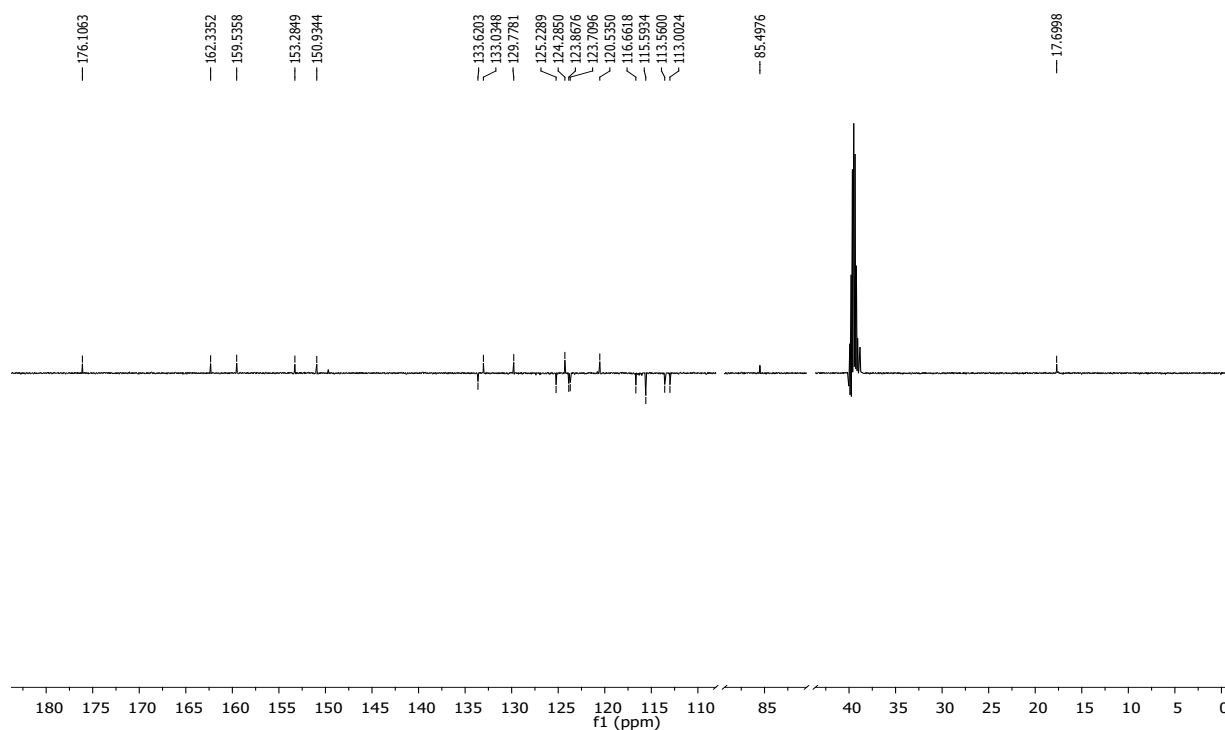

**Figure S3.**  $^1\text{H}$  NMR spectrum (DMSO- $d_6$ , 400 MHz) of 2-(2-(4-chloro-2-oxo-2H-chromen-3-yl)-1H-benzo[d]imidazol-5-yl)-3,4,5,6-tetrahydropyrimidin-1-ium chloride **8**

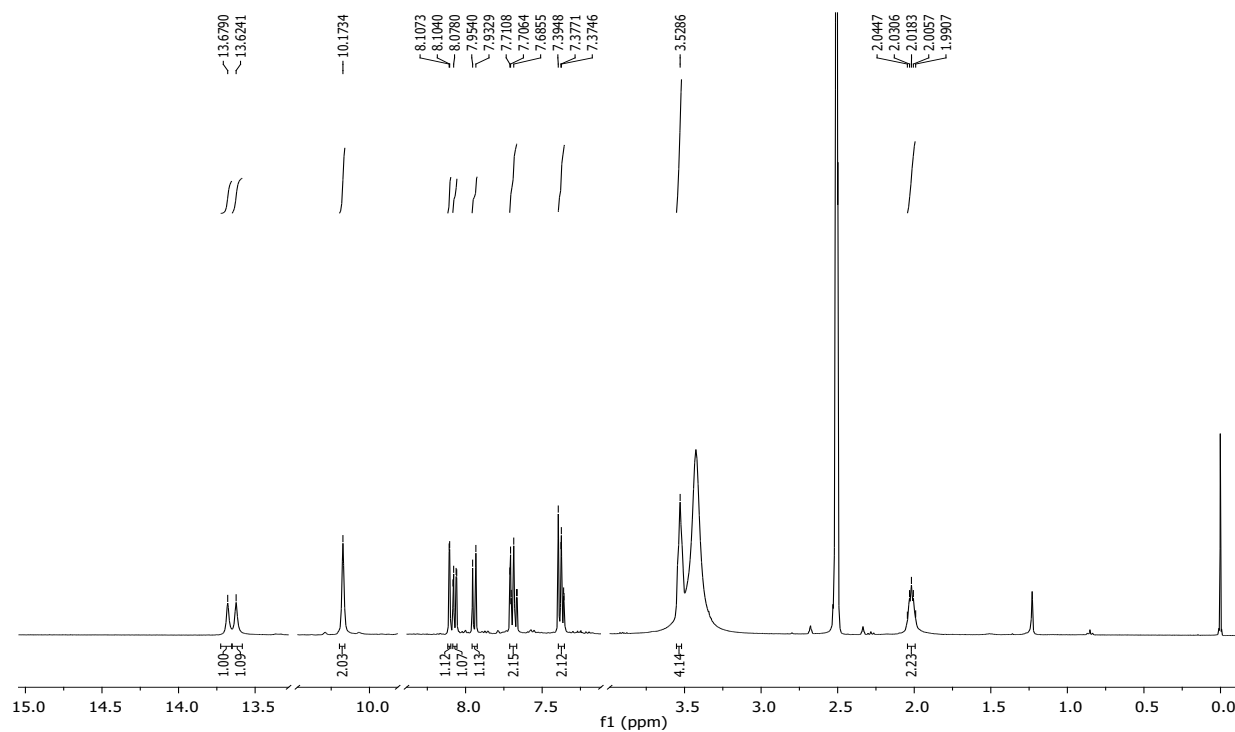

**Figure S4.**  $^{13}\text{C}$  NMR spectrum (DMSO- $d_6$ , 101 MHz) of 2-(2-(4-chloro-2-oxo-2H-chromen-3-yl)-1H-benzo[d]imidazol-5-yl)-3,4,5,6-tetrahydropyrimidin-1-ium chloride **8**

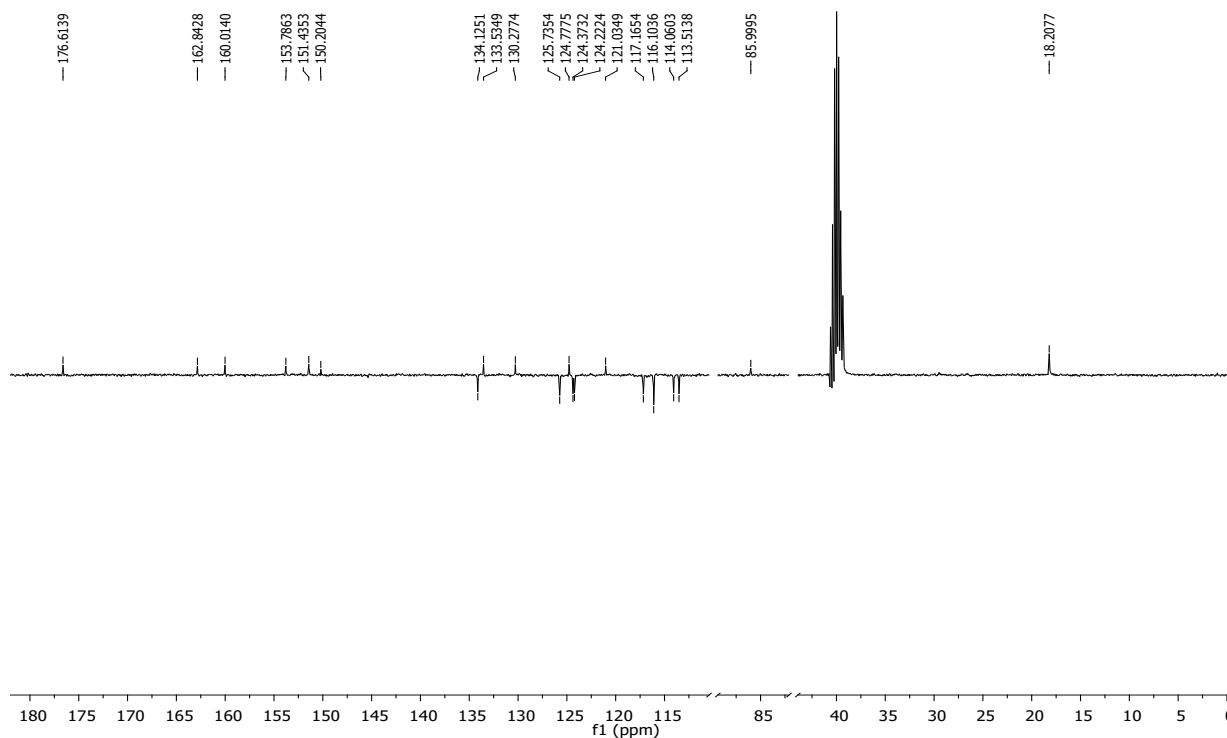

**Figure S5.**  $^1\text{H}$  NMR spectrum (DMSO- $d_6$ , 600 MHz) of **2-(2-(6-bromo-4-chloro-2-oxo-2H-chromen-3-yl)-1H-benzo[d]imidazol-5-yl)-4,5-dihydro-1H-imidazol-3-ium chloride 9**

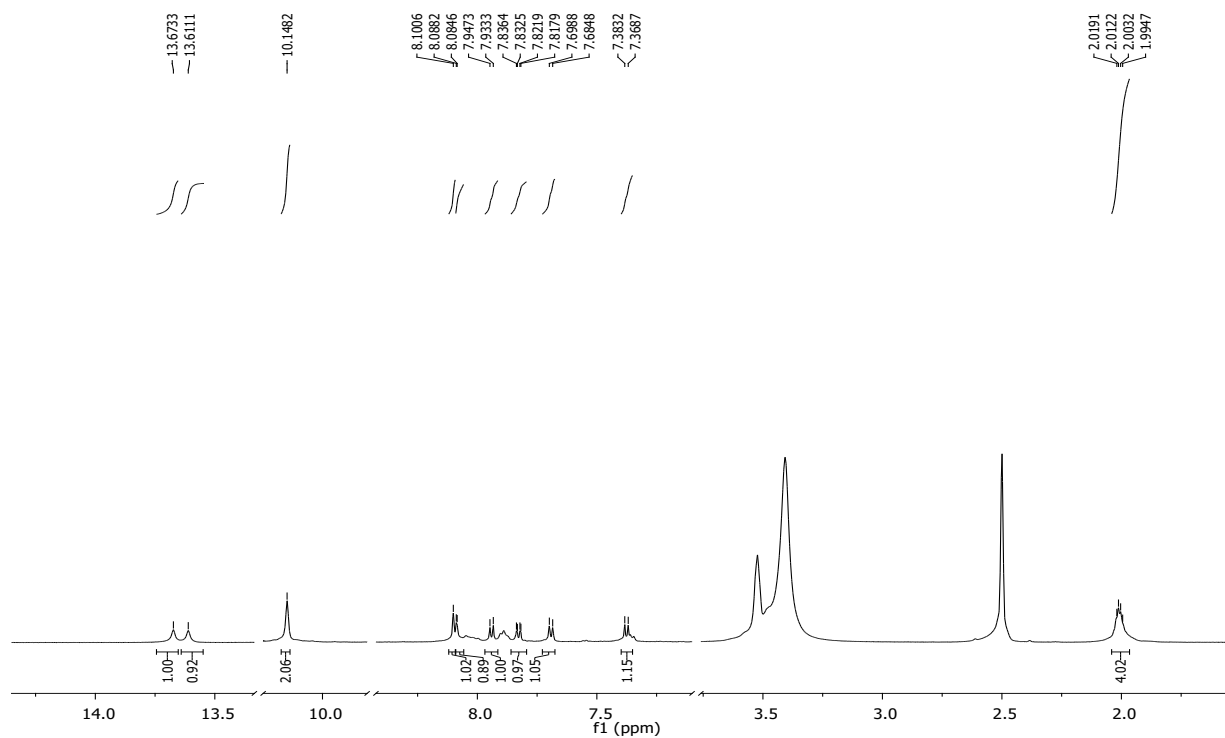

**Figure S6.**  $^{13}\text{C}$  NMR spectrum (DMSO- $d_6$ , 151 MHz) of **2-(2-(6-bromo-4-chloro-2-oxo-2H-chromen-3-yl)-1H-benzo[d]imidazol-5-yl)-4,5-dihydro-1H-imidazol-3-ium chloride 9**

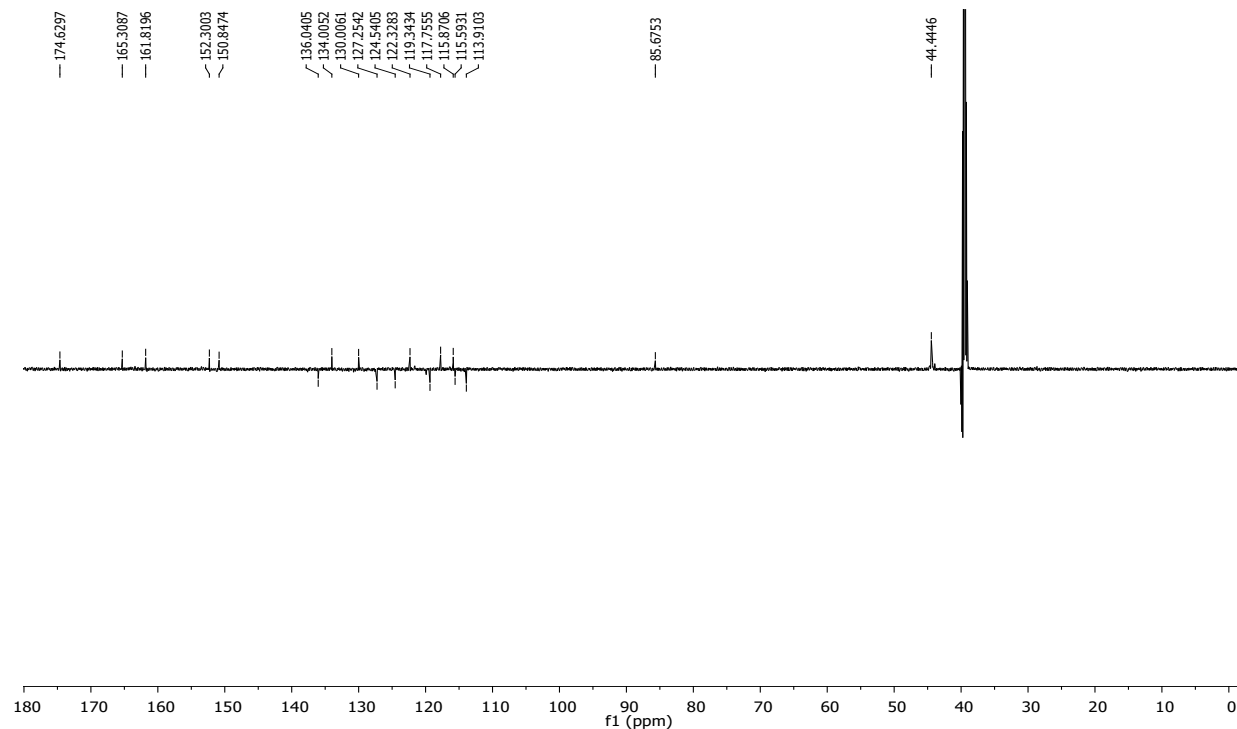



**Figure S7.**  $^1\text{H}$  NMR spectrum (DMSO- $d_6$ , 600 MHz) of 2-(2-(6-bromo-4-chloro-2-oxo-2H-chromen-3-yl)-1H-benzo[d]imidazol-5-yl)-3,4,5,6-tetrahydropyrimidin-1-ium chloride 10

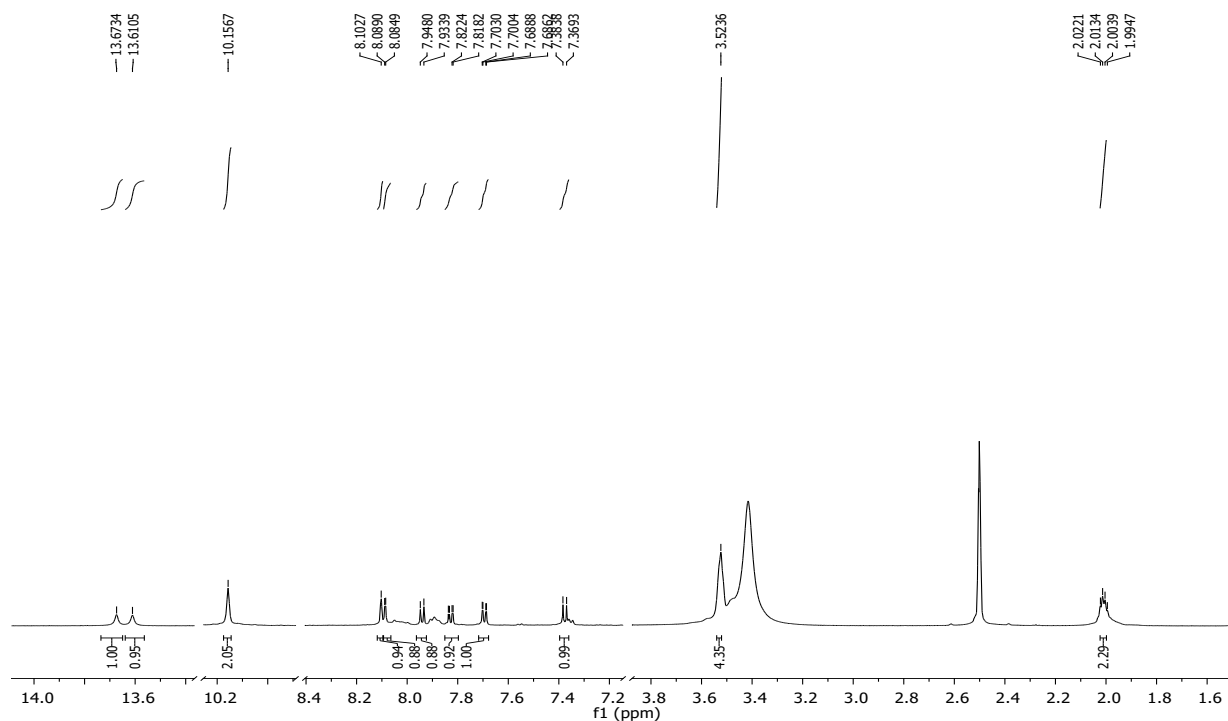

**Figure S8.**  $^{13}\text{C}$  NMR spectrum (DMSO- $d_6$ , 151 MHz) of 2-(2-(6-bromo-4-chloro-2-oxo-2H-chromen-3-yl)-1H-benzo[d]imidazol-5-yl)-3,4,5,6-tetrahydropyrimidin-1-ium chloride 10

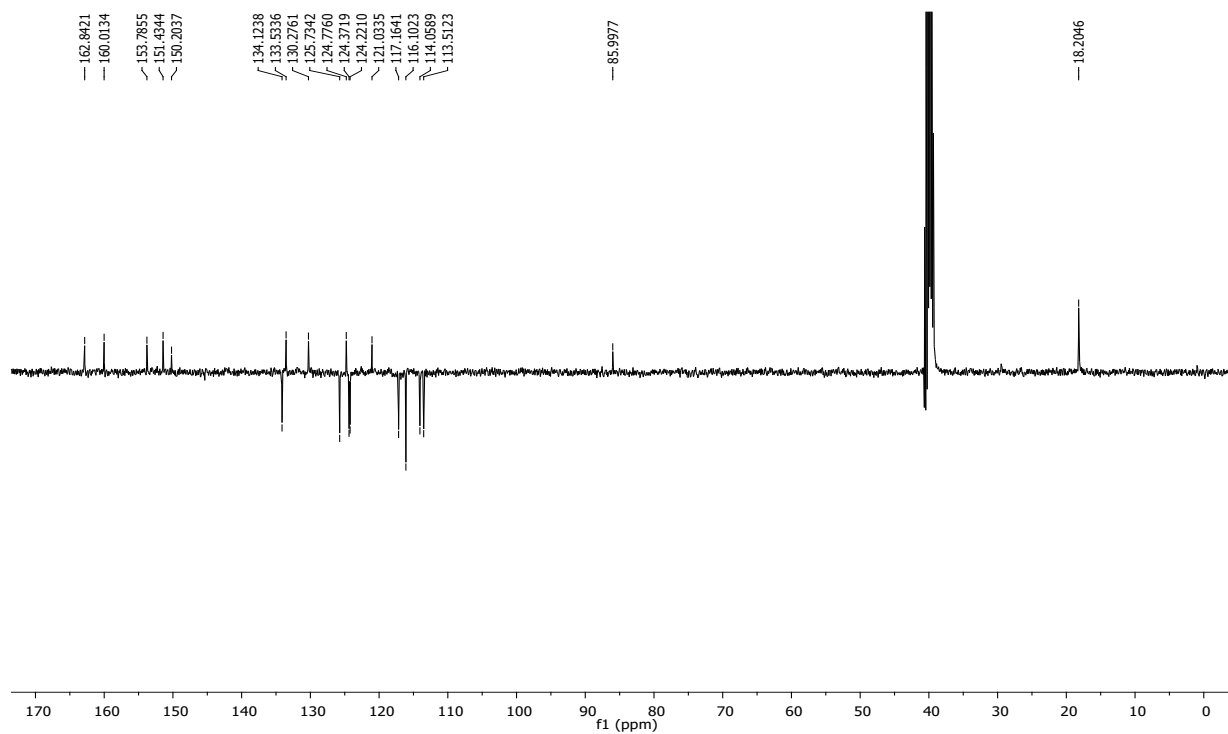

**Figure S9.**  $^1\text{H}$  NMR spectrum (DMSO- $d_6$ , 400 MHz) of **2-(2-(4-chloro-6-methyl-2-oxo-2H-chromen-3-yl)-1H-benzo[d]imidazol-5-yl)-4,5-dihydro-1H-imidazol-3-ium chloride 11**

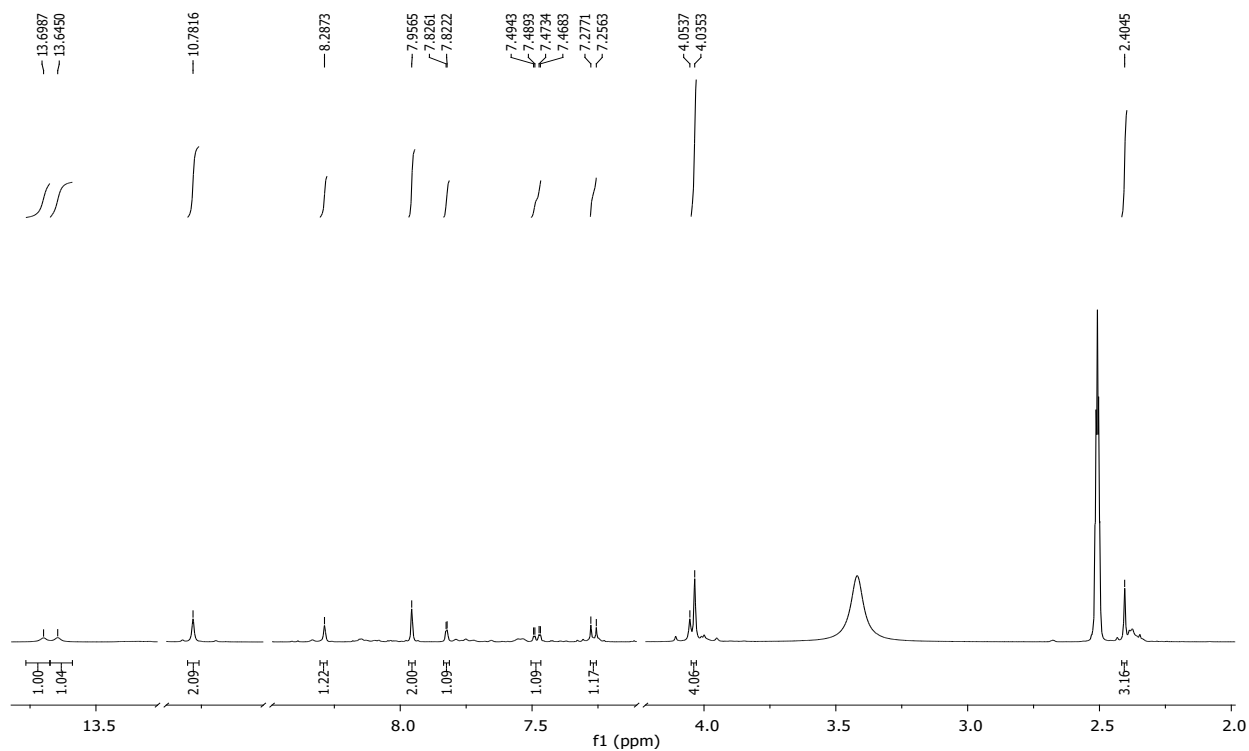

**11**

**Figure S10.**  $^{13}\text{C}$  NMR spectrum (DMSO- $d_6$ , 101 MHz) of **2-(2-(4-chloro-6-methyl-2-oxo-2H-chromen-3-yl)-1H-benzo[d]imidazol-5-yl)-4,5-dihydro-1H-imidazol-3-ium chloride 11**

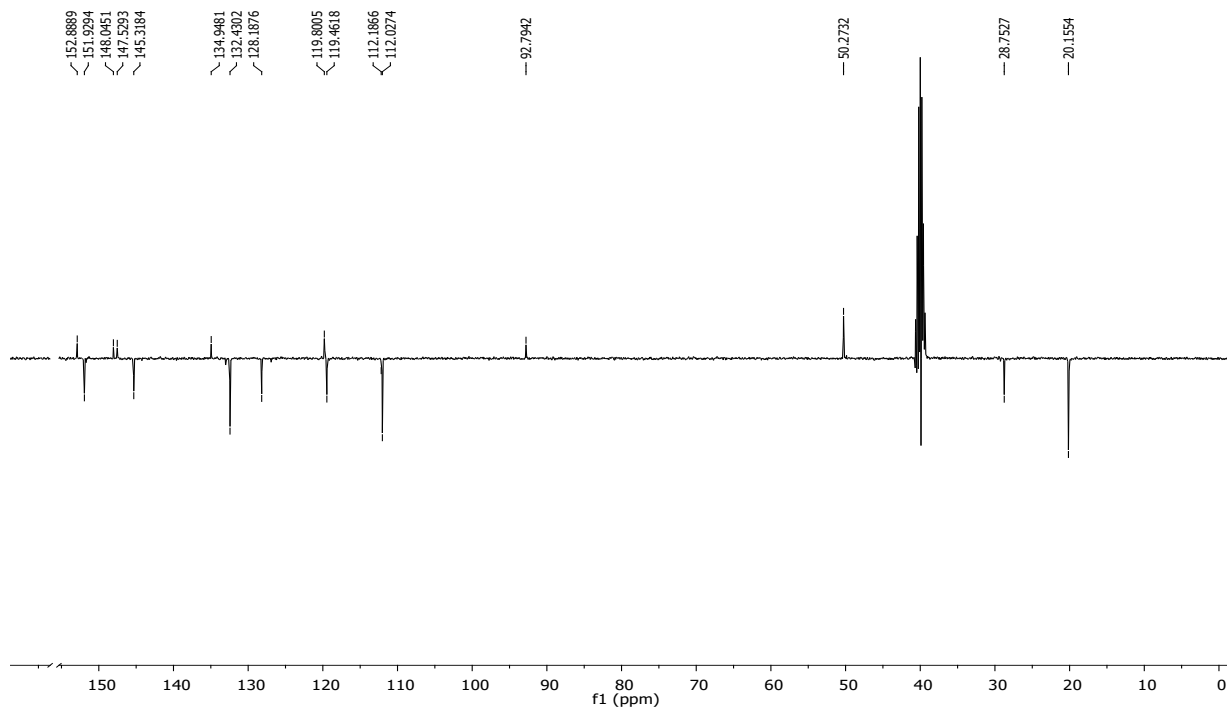

**Figure S11.**  $^1\text{H}$  NMR spectrum (DMSO- $d_6$ , 400 MHz) of 2-(2-(4-chloro-6-methyl-2-oxo-2H-chromen-3-yl)-1H-benzo[d]imidazol-5-yl)-3,4,5,6-tetrahydropyrimidin-1-ium chloride **12**

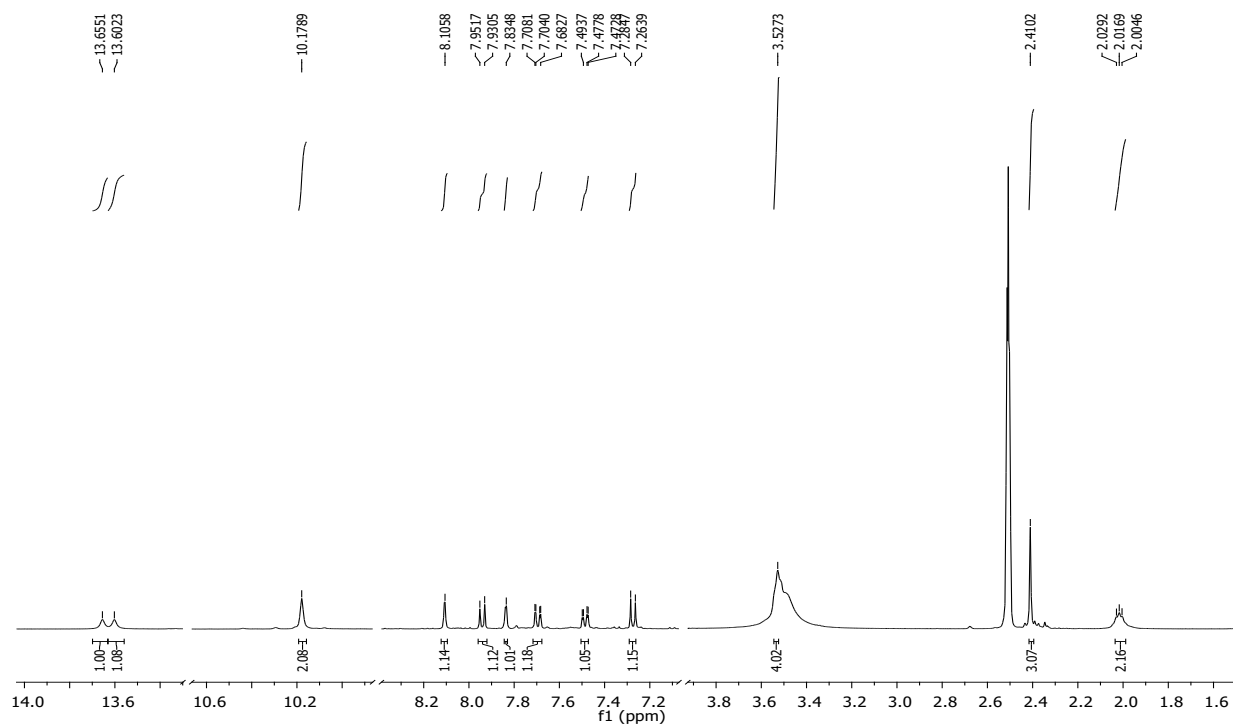

**Figure S12.**  $^{13}\text{C}$  NMR spectrum (DMSO- $d_6$ , 101 MHz) of 2-(2-(4-chloro-6-methyl-2-oxo-2H-chromen-3-yl)-1H-benzo[d]imidazol-5-yl)-3,4,5,6-tetrahydropyrimidin-1-ium chloride **12**

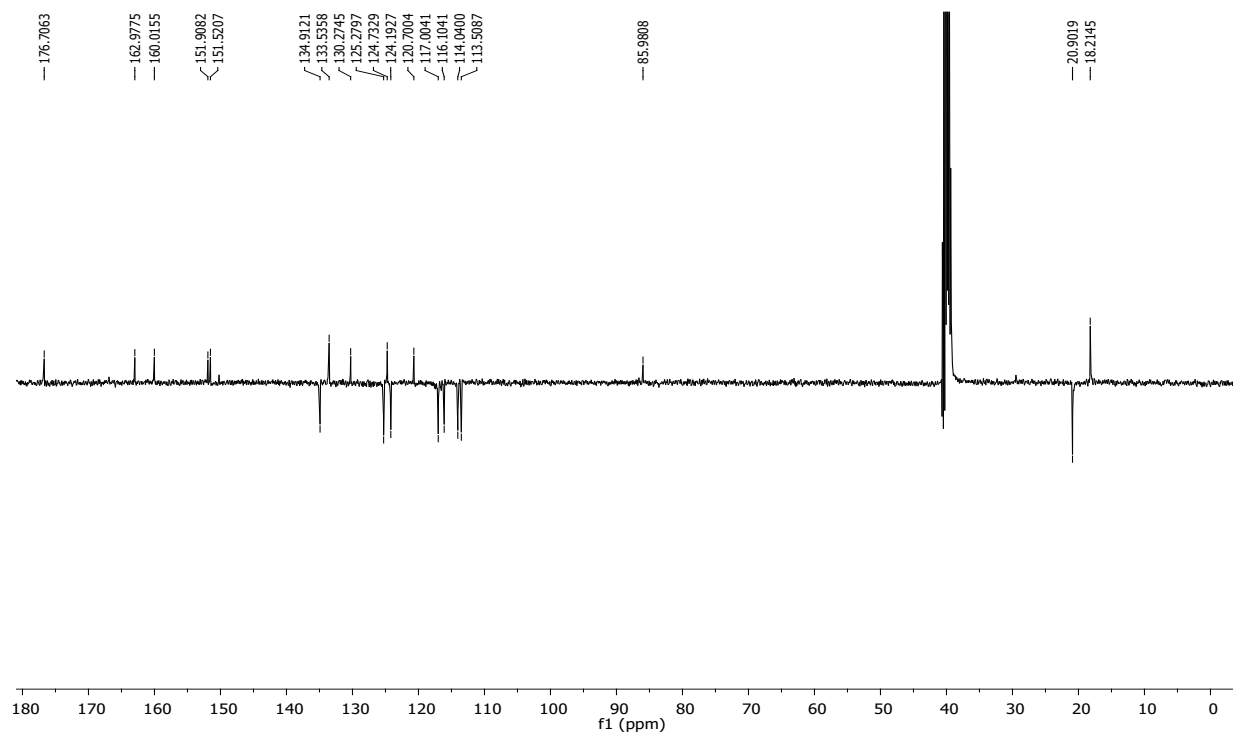

**Figure S13.**  $^1\text{H}$  NMR spectrum (DMSO- $d_6$ , 400 MHz) of **2-(2-(7-(diethylamino)-2-oxo-2H-chromen-3-yl)-1H-benzo[d]imidazol-5-yl)-4,5-dihydro-1H-imidazol-3-ium chloride 13**

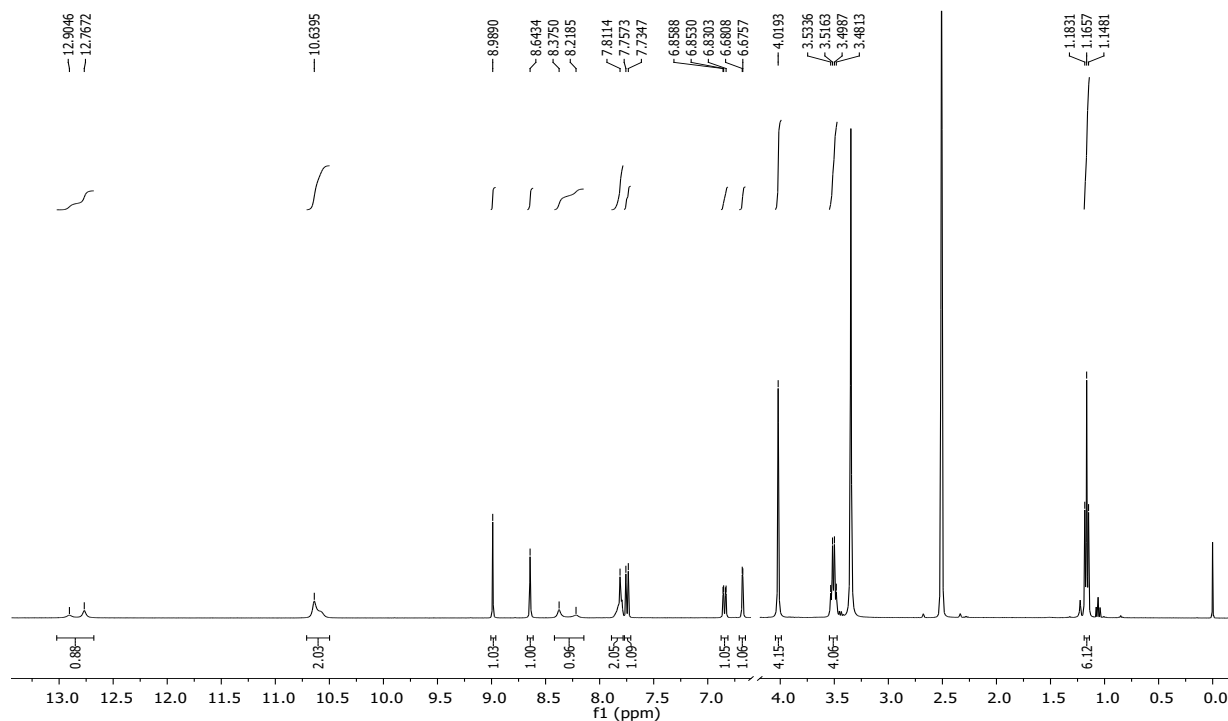

**Figure S14.**  $^{13}\text{C}$  NMR spectrum (DMSO- $d_6$ , 101 MHz) of **2-(2-(7-(diethylamino)-2-oxo-2H-chromen-3-yl)-1H-benzo[d]imidazol-5-yl)-4,5-dihydro-1H-imidazol-3-ium chloride 13**

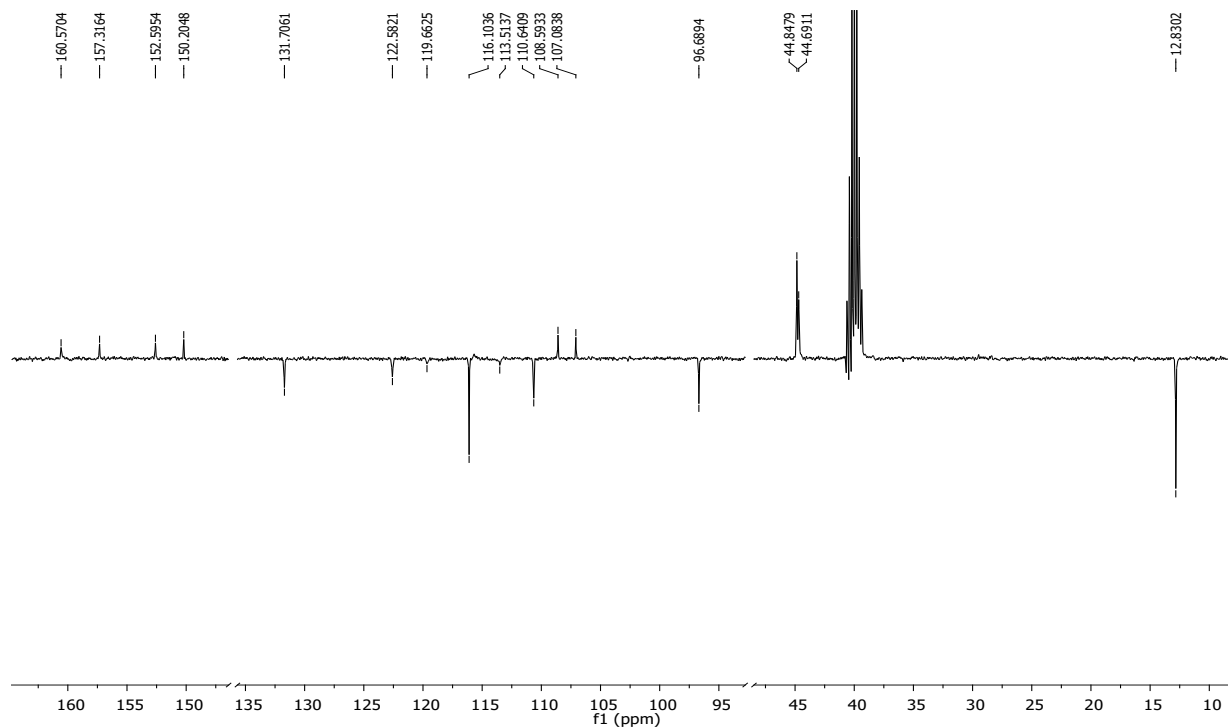

**Figure S15.**  $^1\text{H}$  NMR spectrum ( $\text{DMSO-}d_6$ , 400 MHz) of **2-(2-(7-(diethylamino)-2-oxo-2H-chromen-3-yl)-1H-benzo[d]imidazol-5-yl)-3,4,5,6-tetrahydropyrimidin-1-ium chloride 14**

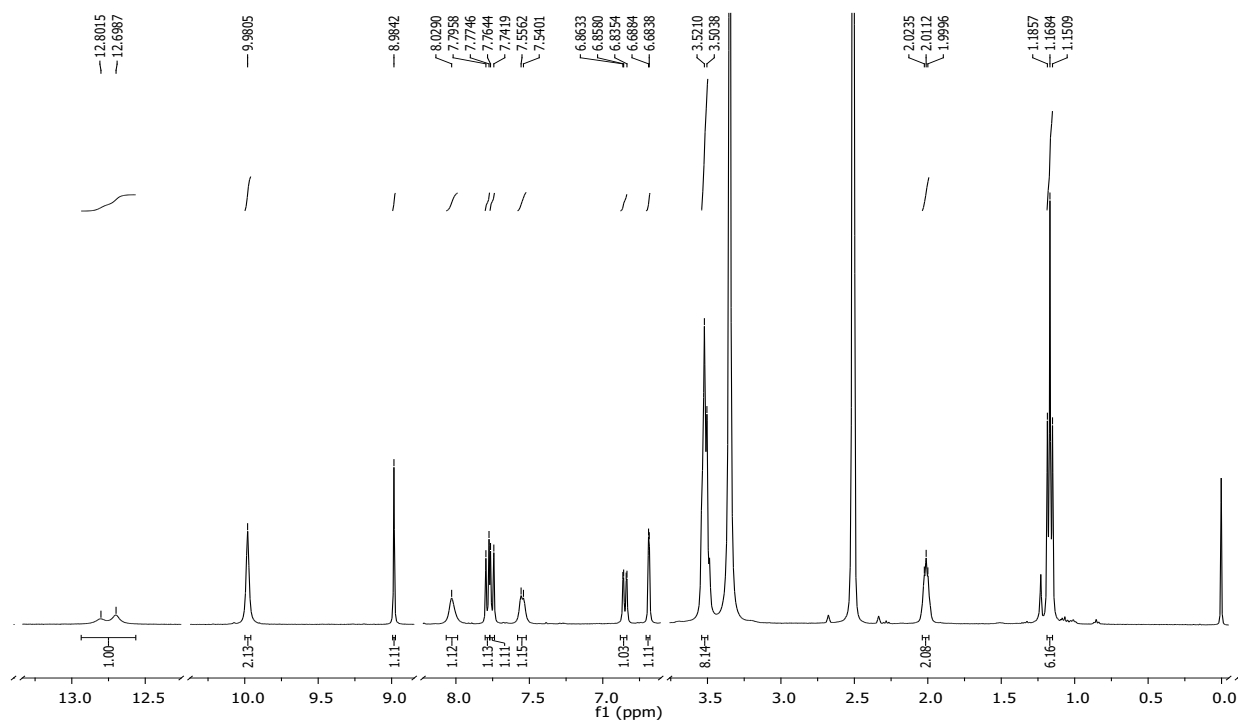

**Figure S16.**  $^{13}\text{C}$  NMR spectrum ( $\text{DMSO-}d_6$ , 101 MHz) of **2-(2-(7-(diethylamino)-2-oxo-2H-chromen-3-yl)-1H-benzo[d]imidazol-5-yl)-3,4,5,6-tetrahydropyrimidin-1-ium chloride 14**

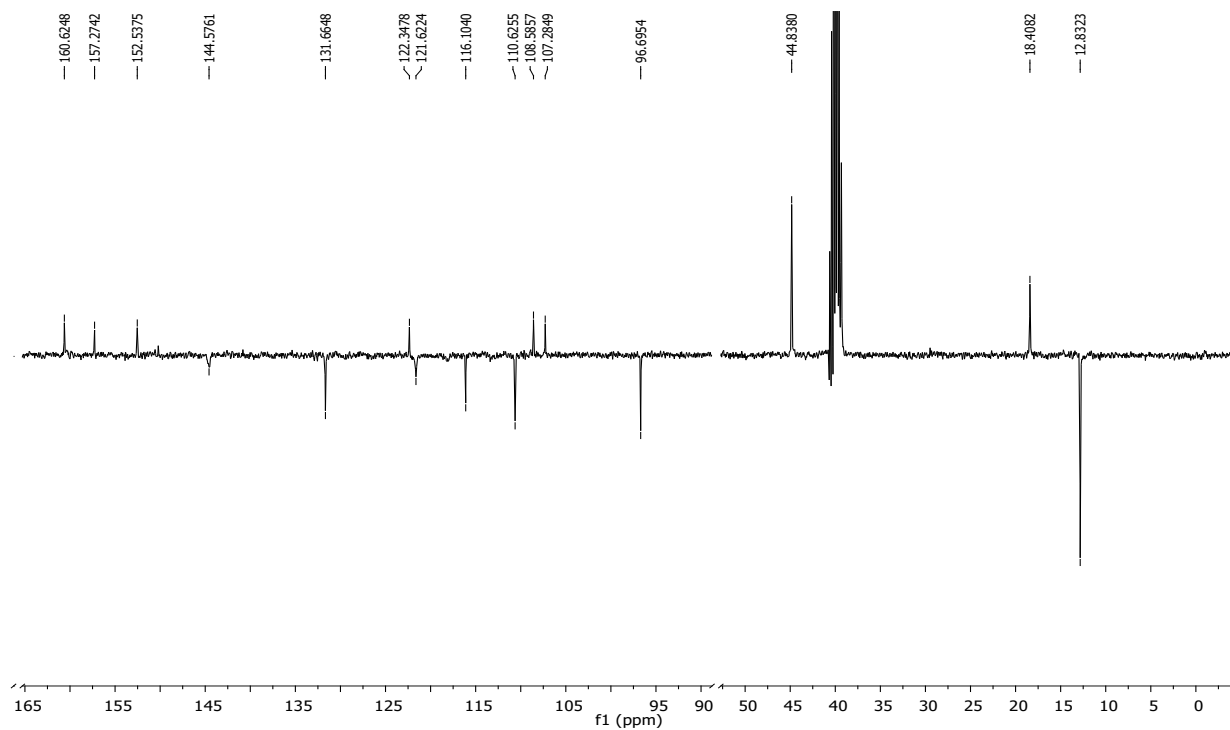

**Figure S17.**  $^1\text{H}$  NMR spectrum (DMSO- $d_6$ , 300 MHz) of 2-[2-(7-(*N,N*-diethylamino)-2-oxo-2*H*-chromen-3-yl)benzo[*d*]thiazol-6-yl]-4,5-dihydro-1*H*-imidazol-3-ium chloride **17**

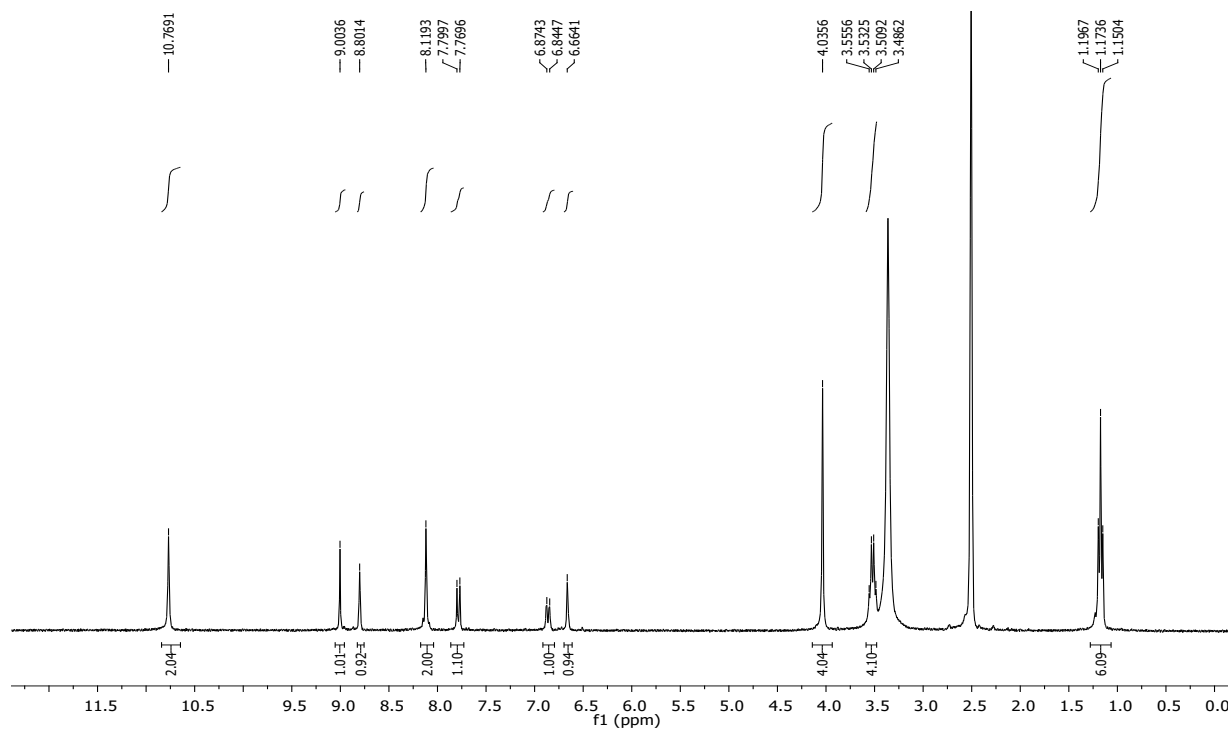

**Figure S18.**  $^{13}\text{C}$  NMR spectrum (DMSO- $d_6$ , 151 MHz) of 2-[2-(7-(*N,N*-diethylamino)-2-oxo-2*H*-chromen-3-yl)benzo[*d*]thiazol-6-yl]-4,5-dihydro-1*H*-imidazol-3-ium chloride **17**

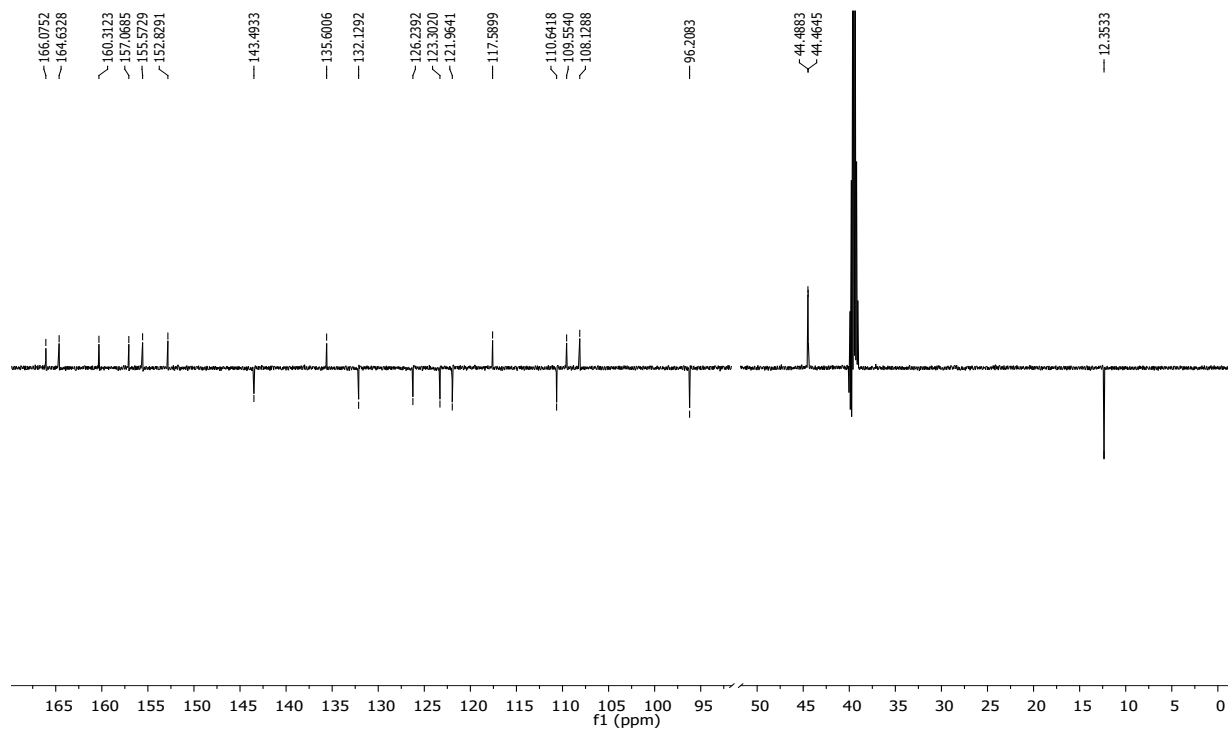

**Figure S19.**  $^1\text{H}$  NMR spectrum (DMSO- $d_6$ , 300 MHz) of 2-[2-(7-(*N,N*-diethylamino)-2-oxo-2*H*-chromen-3-yl)benzo[*d*]thiazol-6-yl]-3,4,5,6 tetrahydropyrimidin-1-ium chloride **18**

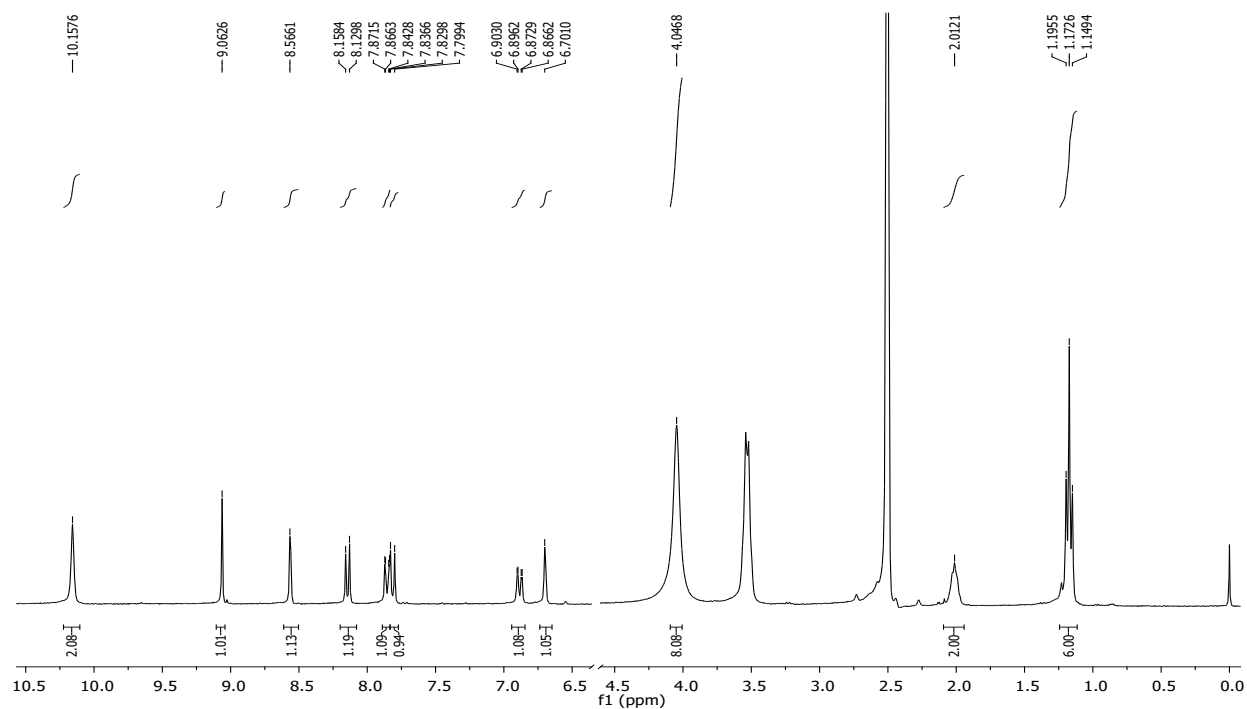

**Figure S20.**  $^{13}\text{C}$  NMR spectrum (DMSO- $d_6$ , 75 MHz) of 2-[2-(7-(*N,N*-diethylamino)-2-oxo-2*H*-chromen-3-yl)benzo[*d*]thiazol-6-yl]-3,4,5,6 tetrahydropyrimidin-1-ium chloride **18**

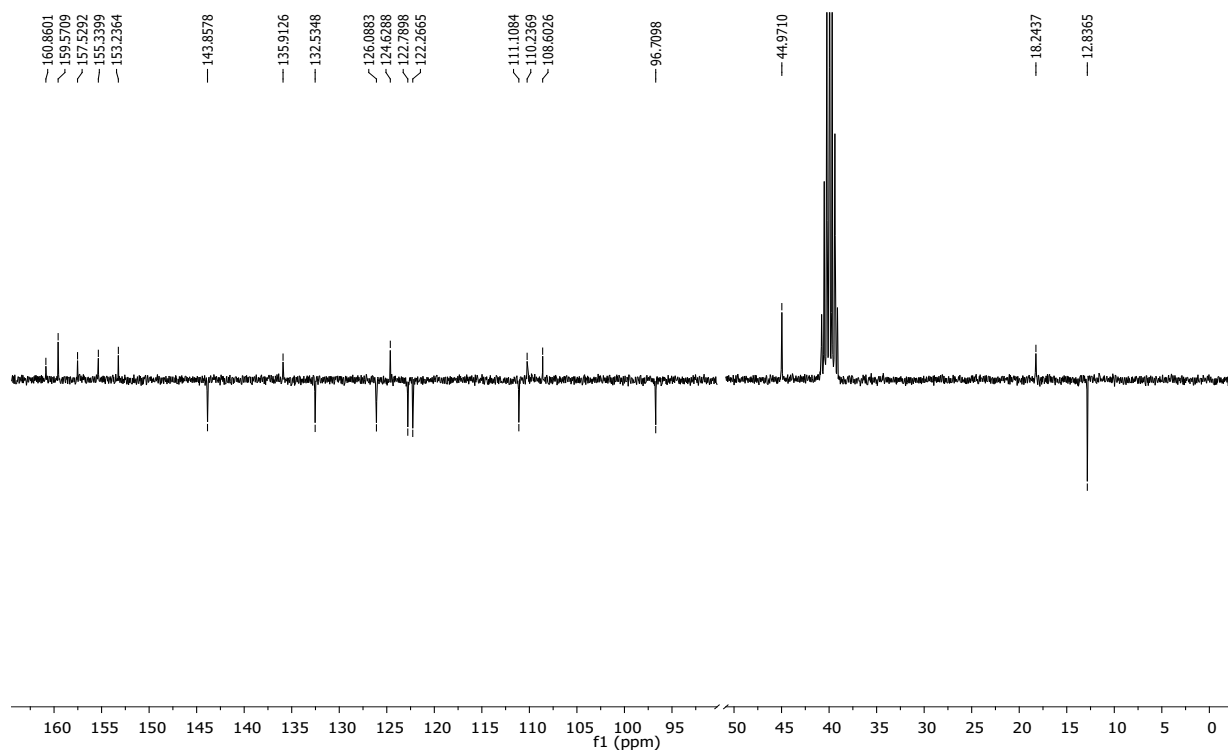

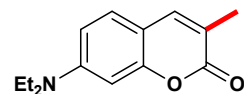

m2

| Initial molecule <b>m2</b><br>$E_{EL} = -670.359596237$ a.u. |   |   |           |           |           | Radical cation <b>m2<sup>•+</sup></b> with 1 e <sup>-</sup> less<br>$E_{EL} = -670.173124412$ a.u. |   |   |           |           |           | Radical anion <b>m2<sup>•-</sup></b> with 1 e <sup>-</sup> more<br>$E_{EL} = -670.439599870$ a.u. |   |   |           |           |           |
|--------------------------------------------------------------|---|---|-----------|-----------|-----------|----------------------------------------------------------------------------------------------------|---|---|-----------|-----------|-----------|---------------------------------------------------------------------------------------------------|---|---|-----------|-----------|-----------|
| Cartesian Coordinates                                        |   |   |           |           |           | Cartesian Coordinates                                                                              |   |   |           |           |           | Cartesian Coordinates                                                                             |   |   |           |           |           |
| 1                                                            | 6 | 0 | 1.003055  | -0.814738 | -0.022925 | 1                                                                                                  | 6 | 0 | 0.992329  | -0.830836 | 0.000066  | 1                                                                                                 | 6 | 0 | 1.000897  | -0.784675 | -0.108402 |
| 2                                                            | 1 | 0 | 1.175550  | -1.883805 | -0.020471 | 2                                                                                                  | 1 | 0 | 1.176979  | -1.897174 | 0.000012  | 2                                                                                                 | 1 | 0 | 1.161131  | -1.856284 | -0.138407 |
| 3                                                            | 6 | 0 | 2.071712  | 0.116748  | -0.034594 | 3                                                                                                  | 6 | 0 | 2.057992  | 0.119151  | 0.000069  | 3                                                                                                 | 6 | 0 | 2.087688  | 0.129784  | -0.120919 |
| 4                                                            | 6 | 0 | 1.743185  | 1.510090  | -0.019710 | 4                                                                                                  | 6 | 0 | 1.741936  | 1.523814  | 0.000045  | 4                                                                                                 | 6 | 0 | 1.767852  | 1.505631  | -0.060582 |
| 5                                                            | 6 | 0 | 0.428399  | 1.932159  | -0.010110 | 5                                                                                                  | 6 | 0 | 0.435256  | 1.937919  | 0.000054  | 5                                                                                                 | 6 | 0 | 0.441526  | 1.940637  | -0.018042 |
| 6                                                            | 6 | 0 | -0.644797 | 1.012210  | -0.008796 | 6                                                                                                  | 6 | 0 | -0.634711 | 1.002211  | 0.000068  | 6                                                                                                 | 6 | 0 | -0.655595 | 1.043912  | -0.018859 |
| 7                                                            | 6 | 0 | -0.304768 | -0.354187 | -0.014338 | 7                                                                                                  | 6 | 0 | -0.305581 | -0.378161 | 0.000072  | 7                                                                                                 | 6 | 0 | -0.310097 | -0.332839 | -0.064088 |
| 8                                                            | 7 | 0 | 3.375162  | -0.302529 | -0.062745 | 8                                                                                                  | 7 | 0 | 3.343801  | -0.299056 | -0.000003 | 8                                                                                                 | 7 | 0 | 3.417751  | -0.325502 | -0.232002 |
| 9                                                            | 1 | 0 | 2.530626  | 2.254020  | -0.017251 | 9                                                                                                  | 1 | 0 | 2.533893  | 2.261812  | 0.000002  | 9                                                                                                 | 1 | 0 | 2.551390  | 2.254942  | -0.052107 |
| 10                                                           | 1 | 0 | 0.206099  | 2.996813  | -0.000755 | 10                                                                                                 | 1 | 0 | 0.199595  | 2.998042  | 0.000037  | 10                                                                                                | 1 | 0 | 0.240535  | 3.009915  | 0.026975  |
| 11                                                           | 6 | 0 | -2.027836 | 1.362511  | 0.002692  | 11                                                                                                 | 6 | 0 | -2.008433 | 1.373875  | 0.000031  | 11                                                                                                | 6 | 0 | -2.034420 | 1.396379  | 0.030767  |
| 12                                                           | 8 | 0 | -1.302706 | -1.303022 | -0.007385 | 12                                                                                                 | 8 | 0 | -1.298838 | -1.321427 | 0.000050  | 12                                                                                                | 8 | 0 | -1.298065 | -1.303145 | -0.057110 |
| 13                                                           | 6 | 0 | -2.647256 | -0.981691 | 0.003340  | 13                                                                                                 | 6 | 0 | -2.636696 | -0.991638 | 0.000001  | 13                                                                                                | 6 | 0 | -2.686844 | -0.961233 | -0.003220 |
| 14                                                           | 6 | 0 | -3.018893 | 0.418590  | 0.008271  | 14                                                                                                 | 6 | 0 | -3.001168 | 0.431681  | -0.000013 | 14                                                                                                | 6 | 0 | -3.037090 | 0.387502  | 0.037478  |
| 15                                                           | 8 | 0 | -3.426985 | -1.935893 | 0.008191  | 15                                                                                                 | 8 | 0 | -3.430876 | -1.917477 | -0.000049 | 15                                                                                                | 8 | 0 | -3.439427 | -1.983776 | 0.001283  |
| 16                                                           | 6 | 0 | -4.486168 | 0.748052  | 0.020191  | 16                                                                                                 | 6 | 0 | -4.459111 | 0.760397  | -0.000098 | 16                                                                                                | 6 | 0 | -4.505493 | 0.741341  | 0.091017  |
| 17                                                           | 1 | 0 | -2.293598 | 2.418254  | 0.007292  | 17                                                                                                 | 1 | 0 | -2.263502 | 2.430598  | 0.000012  | 17                                                                                                | 1 | 0 | -2.320472 | 2.445465  | 0.066021  |
| 18                                                           | 1 | 0 | -4.997087 | 0.334745  | -0.859344 | 18                                                                                                 | 1 | 0 | -4.954483 | 0.332004  | -0.881120 | 18                                                                                                | 1 | 0 | -5.057621 | 0.367232  | -0.783915 |
| 19                                                           | 1 | 0 | -4.983986 | 0.329044  | 0.904512  | 19                                                                                                 | 1 | 0 | -4.954610 | 0.331912  | 0.880806  | 19                                                                                                | 1 | 0 | -5.004403 | 0.321302  | 0.977006  |
| 20                                                           | 1 | 0 | -4.633672 | 1.832781  | 0.024811  | 20                                                                                                 | 1 | 0 | -4.610730 | 1.843007  | -0.000057 | 20                                                                                                | 1 | 0 | -4.637225 | 1.829604  | 0.123241  |
| 21                                                           | 6 | 0 | 4.464331  | 0.663328  | 0.056438  | 21                                                                                                 | 6 | 0 | 4.455166  | 0.662737  | -0.000143 | 21                                                                                                | 6 | 0 | 4.475747  | 0.612972  | 0.131948  |
| 22                                                           | 6 | 0 | 3.684941  | -1.726248 | 0.022745  | 22                                                                                                 | 6 | 0 | 3.668997  | -1.732017 | -0.000006 | 22                                                                                                | 6 | 0 | 3.690523  | -1.704227 | 0.168953  |
| 23                                                           | 1 | 0 | 5.414264  | 0.130101  | 0.004609  | 23                                                                                                 | 1 | 0 | 5.393815  | 0.113518  | -0.000272 | 23                                                                                                | 1 | 0 | 5.443491  | 0.130469  | -0.026699 |
| 24                                                           | 1 | 0 | 4.442473  | 1.392790  | -0.762278 | 24                                                                                                 | 1 | 0 | 4.407742  | 1.293682  | -0.893276 | 24                                                                                                | 1 | 0 | 4.445695  | 1.503299  | -0.503045 |
| 25                                                           | 1 | 0 | 4.426733  | 1.209497  | 1.009935  | 25                                                                                                 | 1 | 0 | 4.407981  | 1.293654  | 0.893026  | 25                                                                                                | 1 | 0 | 4.416051  | 0.936460  | 1.186616  |
| 26                                                           | 1 | 0 | 4.764513  | -1.860198 | -0.055584 | 26                                                                                                 | 1 | 0 | 4.750180  | -1.849375 | 0.000024  | 26                                                                                                | 1 | 0 | 4.753240  | -1.910106 | 0.018611  |
| 27                                                           | 1 | 0 | 3.349130  | -2.162784 | 0.974988  | 27                                                                                                 | 1 | 0 | 3.254172  | -2.210943 | 0.892786  | 27                                                                                                | 1 | 0 | 3.444546  | -1.896618 | 1.228476  |
| 28                                                           | 1 | 0 | 3.214915  | -2.283180 | -0.796920 | 28                                                                                                 | 1 | 0 | 3.254220  | -2.210915 | -0.892843 | 28                                                                                                | 1 | 0 | 3.131156  | -2.412901 | -0.448452 |



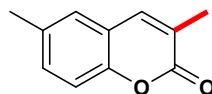

m3

| Initial molecule <b>m3</b><br>$E_{EL} = -575.699976269$ a.u. |   |   |           |           |           | Radical cation <b>m3<sup>•+</sup></b> with 1 e <sup>-</sup> less<br>$E_{EL} = -575.475814661$ a.u. |   |   |           |           |           | Radical anion <b>m3<sup>•-</sup></b> with 1 e <sup>-</sup> more<br>$E_{EL} = -575.787880132$ a.u. |   |   |           |           |           |
|--------------------------------------------------------------|---|---|-----------|-----------|-----------|----------------------------------------------------------------------------------------------------|---|---|-----------|-----------|-----------|---------------------------------------------------------------------------------------------------|---|---|-----------|-----------|-----------|
| Cartesian Coordinates                                        |   |   |           |           |           | Cartesian Coordinates                                                                              |   |   |           |           |           | Cartesian Coordinates                                                                             |   |   |           |           |           |
| 1                                                            | 6 | 0 | -1.306375 | 1.681811  | -0.000118 | 1                                                                                                  | 6 | 0 | -1.309224 | 1.700074  | -0.000808 | 1                                                                                                 | 6 | 0 | -1.304164 | 1.670436  | 0.000047  |
| 2                                                            | 1 | 0 | -1.164913 | 2.758771  | -0.000172 | 2                                                                                                  | 1 | 0 | -1.168170 | 2.775663  | -0.001125 | 2                                                                                                 | 1 | 0 | -1.152428 | 2.747763  | 0.000076  |
| 3                                                            | 6 | 0 | -2.576802 | 1.114473  | -0.000061 | 3                                                                                                  | 6 | 0 | -2.556505 | 1.121031  | -0.000379 | 3                                                                                                 | 6 | 0 | -2.602384 | 1.126536  | 0.000093  |
| 4                                                            | 6 | 0 | -2.766290 | -0.286299 | 0.000020  | 4                                                                                                  | 6 | 0 | -2.741787 | -0.314810 | 0.000157  | 4                                                                                                 | 6 | 0 | -2.787732 | -0.270369 | 0.000033  |
| 5                                                            | 6 | 0 | -1.638996 | -1.104096 | 0.000010  | 5                                                                                                  | 6 | 0 | -1.622182 | -1.135477 | 0.000034  | 5                                                                                                 | 6 | 0 | -1.663663 | -1.099082 | -0.000049 |
| 6                                                            | 6 | 0 | -0.336066 | -0.560561 | -0.000056 | 6                                                                                                  | 6 | 0 | -0.327969 | -0.587175 | -0.000329 | 6                                                                                                 | 6 | 0 | -0.334160 | -0.585721 | -0.000075 |
| 7                                                            | 6 | 0 | -0.197980 | 0.835167  | -0.000094 | 7                                                                                                  | 6 | 0 | -0.190694 | 0.853433  | -0.000588 | 7                                                                                                 | 6 | 0 | -0.200153 | 0.830538  | -0.000048 |
| 8                                                            | 1 | 0 | -3.446046 | 1.768525  | -0.000067 | 8                                                                                                  | 1 | 0 | -3.439819 | 1.753854  | -0.000363 | 8                                                                                                 | 1 | 0 | -3.463331 | 1.791779  | 0.000160  |
| 9                                                            | 6 | 0 | -4.160474 | -0.866453 | 0.000157  | 9                                                                                                  | 6 | 0 | -4.129492 | -0.862143 | 0.000910  | 9                                                                                                 | 6 | 0 | -4.183092 | -0.856489 | 0.000031  |
| 10                                                           | 1 | 0 | -1.749492 | -2.186336 | 0.000046  | 10                                                                                                 | 1 | 0 | -1.732253 | -2.215730 | 0.000334  | 10                                                                                                | 1 | 0 | -1.794881 | -2.180577 | -0.000058 |
| 11                                                           | 6 | 0 | 0.865049  | -1.351647 | -0.000076 | 11                                                                                                 | 6 | 0 | 0.855056  | -1.369534 | -0.000397 | 11                                                                                                | 6 | 0 | 0.846753  | -1.369664 | -0.000082 |
| 12                                                           | 8 | 0 | 1.052059  | 1.411051  | -0.000123 | 12                                                                                                 | 8 | 0 | 1.018769  | 1.423020  | -0.000451 | 12                                                                                                | 8 | 0 | 1.058028  | 1.418656  | -0.000138 |
| 13                                                           | 6 | 0 | 2.212389  | 0.671904  | 0.000086  | 13                                                                                                 | 6 | 0 | 2.203301  | 0.677678  | 0.000531  | 13                                                                                                | 6 | 0 | 2.246723  | 0.636369  | -0.000041 |
| 14                                                           | 6 | 0 | 2.102478  | -0.783059 | -0.000035 | 14                                                                                                 | 6 | 0 | 2.100164  | -0.789607 | -0.000133 | 14                                                                                                | 6 | 0 | 2.128390  | -0.756522 | -0.000030 |
| 15                                                           | 8 | 0 | 3.264883  | 1.305681  | 0.000290  | 15                                                                                                 | 8 | 0 | 3.231216  | 1.316932  | 0.001542  | 15                                                                                                | 8 | 0 | 3.299298  | 1.338110  | 0.000068  |
| 16                                                           | 6 | 0 | 3.383578  | -1.567160 | -0.000066 | 16                                                                                                 | 6 | 0 | 3.375590  | -1.558447 | -0.000429 | 16                                                                                                | 6 | 0 | 3.394530  | -1.580101 | 0.000114  |
| 17                                                           | 1 | 0 | 0.769135  | -2.435564 | -0.000119 | 17                                                                                                 | 1 | 0 | 0.764061  | -2.452289 | -0.000563 | 17                                                                                                | 1 | 0 | 0.769096  | -2.455010 | -0.000072 |
| 18                                                           | 1 | 0 | 3.992577  | -1.330655 | -0.881978 | 18                                                                                                 | 1 | 0 | 3.979070  | -1.302395 | -0.881466 | 18                                                                                                | 1 | 0 | 4.022279  | -1.379979 | -0.880787 |
| 19                                                           | 1 | 0 | 3.992606  | -1.330715 | 0.881839  | 19                                                                                                 | 1 | 0 | 3.980002  | -1.301912 | 0.879795  | 19                                                                                                | 1 | 0 | 4.021867  | -1.380311 | 0.881388  |
| 20                                                           | 1 | 0 | 3.174313  | -2.641314 | -0.000101 | 20                                                                                                 | 1 | 0 | 3.177720  | -2.632974 | -0.000097 | 20                                                                                                | 1 | 0 | 3.156114  | -2.650361 | -0.000136 |
| 21                                                           | 1 | 0 | -4.135582 | -1.961184 | 0.000046  | 21                                                                                                 | 1 | 0 | -4.136042 | -1.954902 | 0.001582  | 21                                                                                                | 1 | 0 | -4.156496 | -1.952015 | -0.000222 |
| 22                                                           | 1 | 0 | -4.725470 | -0.540040 | 0.882976  | 22                                                                                                 | 1 | 0 | -4.680708 | -0.499005 | 0.880209  | 22                                                                                                | 1 | 0 | -4.753504 | -0.535677 | 0.882301  |
| 23                                                           | 1 | 0 | -4.725739 | -0.539829 | -0.882406 | 23                                                                                                 | 1 | 0 | -4.681284 | -0.500060 | -0.878455 | 23                                                                                                | 1 | 0 | -4.753616 | -0.535327 | -0.882050 |

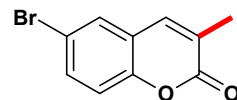

m4

| Initial molecule <b>m4</b><br>$E_{EL} = -3107.50998155$ a.u. |    |   |           |           |           | Radical cation <b>m4<sup>•+</sup></b> with 1 e <sup>-</sup> less<br>$E_{EL} = -3107.27736216$ a.u. |    |   |           |           |           | Radical anion <b>m4<sup>•-</sup></b> with 1 e <sup>-</sup> more<br>$E_{EL} = -3107.60376727$ a.u. |    |   |           |           |           |
|--------------------------------------------------------------|----|---|-----------|-----------|-----------|----------------------------------------------------------------------------------------------------|----|---|-----------|-----------|-----------|---------------------------------------------------------------------------------------------------|----|---|-----------|-----------|-----------|
| Cartesian Coordinates                                        |    |   |           |           |           | Cartesian Coordinates                                                                              |    |   |           |           |           | Cartesian Coordinates                                                                             |    |   |           |           |           |
| 1                                                            | 6  | 0 | 0.078381  | 1.934973  | -0.000015 | 1                                                                                                  | 6  | 0 | 0.088312  | 1.949047  | 0.000092  | 1                                                                                                 | 6  | 0 | 0.073473  | 1.920581  | -0.000009 |
| 2                                                            | 1  | 0 | -0.185426 | 2.988083  | -0.000018 | 2                                                                                                  | 1  | 0 | -0.173849 | 3.001601  | 0.000092  | 2                                                                                                 | 1  | 0 | -0.199165 | 2.973023  | -0.000009 |
| 3                                                            | 6  | 0 | 1.409290  | 1.529178  | -0.000024 | 3                                                                                                  | 6  | 0 | 1.396941  | 1.527605  | 0.000138  | 3                                                                                                 | 6  | 0 | 1.431349  | 1.537583  | -0.000011 |
| 4                                                            | 6  | 0 | 1.716836  | 0.160818  | -0.000035 | 4                                                                                                  | 6  | 0 | 1.710060  | 0.126457  | 0.000192  | 4                                                                                                 | 6  | 0 | 1.726007  | 0.173028  | -0.000011 |
| 5                                                            | 6  | 0 | 0.724982  | -0.807455 | 0.000003  | 5                                                                                                  | 6  | 0 | 0.726037  | -0.839048 | 0.000056  | 5                                                                                                 | 6  | 0 | 0.743395  | -0.808125 | -0.000005 |
| 6                                                            | 6  | 0 | -0.626112 | -0.408419 | 0.000025  | 6                                                                                                  | 6  | 0 | -0.624559 | -0.434670 | -0.000061 | 6                                                                                                 | 6  | 0 | -0.632957 | -0.437556 | 0.000005  |
| 7                                                            | 6  | 0 | -0.921863 | 0.964062  | 0.000017  | 7                                                                                                  | 6  | 0 | -0.925334 | 0.977626  | -0.000026 | 7                                                                                                 | 6  | 0 | -0.922837 | 0.958840  | -0.000000 |
| 8                                                            | 1  | 0 | 2.198073  | 2.274571  | -0.000034 | 8                                                                                                  | 1  | 0 | 2.198100  | 2.259924  | 0.000148  | 8                                                                                                 | 1  | 0 | 2.214007  | 2.288337  | -0.000012 |
| 9                                                            | 35 | 0 | 3.553449  | -0.374847 | -0.000001 | 9                                                                                                  | 35 | 0 | 3.525617  | -0.367791 | -0.000034 | 9                                                                                                 | 35 | 0 | 3.573196  | -0.371775 | 0.000002  |
| 10                                                           | 1  | 0 | 0.965203  | -1.866136 | 0.000010  | 10                                                                                                 | 1  | 0 | 0.956489  | -1.899250 | 0.000011  | 10                                                                                                | 1  | 0 | 1.005954  | -1.861863 | -0.000002 |
| 11                                                           | 6  | 0 | -1.727944 | -1.335261 | 0.000018  | 11                                                                                                 | 6  | 0 | -1.704160 | -1.350119 | -0.000054 | 11                                                                                                | 6  | 0 | -1.717118 | -1.345454 | 0.000004  |
| 12                                                           | 8  | 0 | -2.225347 | 1.391900  | 0.000046  | 12                                                                                                 | 8  | 0 | -2.188669 | 1.404922  | -0.000133 | 12                                                                                                | 8  | 0 | -2.234713 | 1.396943  | 0.000014  |
| 13                                                           | 6  | 0 | -3.295423 | 0.524311  | 0.000113  | 13                                                                                                 | 6  | 0 | -3.281969 | 0.529413  | -0.000414 | 13                                                                                                | 6  | 0 | -3.331264 | 0.490165  | 0.000037  |
| 14                                                           | 6  | 0 | -3.019966 | -0.910389 | 0.000023  | 14                                                                                                 | 6  | 0 | -3.011142 | -0.917153 | -0.000083 | 14                                                                                                | 6  | 0 | -3.057784 | -0.882228 | 0.000010  |
| 15                                                           | 8  | 0 | -4.410812 | 1.033328  | -0.000087 | 15                                                                                                 | 8  | 0 | -4.374706 | 1.046847  | 0.000178  | 15                                                                                                | 8  | 0 | -4.451435 | 1.069363  | -0.000018 |
| 16                                                           | 6  | 0 | -4.205187 | -1.831557 | -0.000035 | 16                                                                                                 | 6  | 0 | -4.186998 | -1.826286 | 0.000145  | 16                                                                                                | 6  | 0 | -4.223880 | -1.840852 | -0.000012 |
| 17                                                           | 1  | 0 | -1.506589 | -2.400282 | -0.000011 | 17                                                                                                 | 1  | 0 | -1.489294 | -2.415351 | 0.000056  | 17                                                                                                | 1  | 0 | -1.517810 | -2.414865 | -0.000012 |
| 18                                                           | 1  | 0 | -4.835914 | -1.662155 | 0.881926  | 18                                                                                                 | 1  | 0 | -4.817109 | -1.636937 | 0.879963  | 18                                                                                                | 1  | 0 | -4.868864 | -1.710550 | 0.881295  |
| 19                                                           | 1  | 0 | -4.835910 | -1.662054 | -0.881978 | 19                                                                                                 | 1  | 0 | -4.817140 | -1.637329 | -0.879735 | 19                                                                                                | 1  | 0 | -4.868884 | -1.710489 | -0.881296 |
| 20                                                           | 1  | 0 | -3.878847 | -2.875766 | -0.000092 | 20                                                                                                 | 1  | 0 | -3.869926 | -2.871350 | 0.000367  | 20                                                                                                | 1  | 0 | -3.868230 | -2.877817 | -0.000052 |

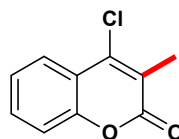

m5

| Initial molecule <b>m5</b><br>$E_{EL} = -995.971544042$ a.u. |    |   |           |           |           | Radical cation <b>m5<sup>•+</sup></b> with 1 e <sup>-</sup> less<br>$E_{EL} = -995.735777746$ a.u. |    |   |           |           |           | Radical anion <b>m5<sup>•-</sup></b> with 1 e <sup>-</sup> more<br>$E_{EL} = -996.068538166$ a.u. |    |   |           |           |           |
|--------------------------------------------------------------|----|---|-----------|-----------|-----------|----------------------------------------------------------------------------------------------------|----|---|-----------|-----------|-----------|---------------------------------------------------------------------------------------------------|----|---|-----------|-----------|-----------|
| Cartesian Coordinates                                        |    |   |           |           |           | Cartesian Coordinates                                                                              |    |   |           |           |           | Cartesian Coordinates                                                                             |    |   |           |           |           |
| 1                                                            | 6  | 0 | 2.340569  | -1.432191 | 0.000032  | 1                                                                                                  | 6  | 0 | 2.361276  | -1.407648 | 0.000314  | 1                                                                                                 | 6  | 0 | 2.350243  | -1.413067 | -0.000001 |
| 2                                                            | 1  | 0 | 2.525062  | -2.502294 | 0.000051  | 2                                                                                                  | 1  | 0 | 2.575898  | -2.470966 | 0.000592  | 2                                                                                                 | 1  | 0 | 2.536046  | -2.484477 | -0.000043 |
| 3                                                            | 6  | 0 | 3.380434  | -0.507929 | 0.000033  | 3                                                                                                  | 6  | 0 | 3.365161  | -0.453257 | 0.000126  | 3                                                                                                 | 6  | 0 | 3.413753  | -0.490214 | 0.000077  |
| 4                                                            | 6  | 0 | 3.104704  | 0.869473  | 0.000002  | 4                                                                                                  | 6  | 0 | 3.062817  | 0.943498  | -0.000300 | 4                                                                                                 | 6  | 0 | 3.128033  | 0.880209  | 0.000107  |
| 5                                                            | 6  | 0 | 1.791651  | 1.322253  | -0.000028 | 5                                                                                                  | 6  | 0 | 1.760359  | 1.375010  | -0.000424 | 5                                                                                                 | 6  | 0 | 1.808711  | 1.335815  | 0.000063  |
| 6                                                            | 6  | 0 | 0.717527  | 0.407299  | -0.000028 | 6                                                                                                  | 6  | 0 | 0.696444  | 0.428415  | -0.000135 | 6                                                                                                 | 6  | 0 | 0.713530  | 0.427067  | -0.000015 |
| 7                                                            | 6  | 0 | 1.026365  | -0.965062 | 0.000002  | 7                                                                                                  | 6  | 0 | 1.037569  | -0.975910 | 0.000103  | 7                                                                                                 | 6  | 0 | 1.039220  | -0.960932 | -0.000050 |
| 8                                                            | 1  | 0 | 4.408893  | -0.858112 | 0.000050  | 8                                                                                                  | 1  | 0 | 4.403575  | -0.770463 | 0.000290  | 8                                                                                                 | 1  | 0 | 4.440686  | -0.845776 | 0.000108  |
| 9                                                            | 1  | 0 | 3.920192  | 1.587087  | 0.000006  | 9                                                                                                  | 1  | 0 | 3.875829  | 1.662324  | -0.000527 | 9                                                                                                 | 1  | 0 | 3.939484  | 1.605059  | 0.000169  |
| 10                                                           | 1  | 0 | 1.588703  | 2.387459  | -0.000067 | 10                                                                                                 | 1  | 0 | 1.532687  | 2.434113  | -0.000787 | 10                                                                                                | 1  | 0 | 1.607804  | 2.402610  | 0.000091  |
| 11                                                           | 6  | 0 | -0.688661 | 0.754650  | -0.000019 | 11                                                                                                 | 6  | 0 | -0.677314 | 0.762261  | 0.000016  | 11                                                                                                | 6  | 0 | -0.666690 | 0.749306  | -0.000034 |
| 12                                                           | 8  | 0 | 0.033684  | -1.912057 | 0.000014  | 12                                                                                                 | 8  | 0 | 0.086746  | -1.927546 | 0.000213  | 12                                                                                                | 8  | 0 | 0.044565  | -1.920516 | -0.000197 |
| 13                                                           | 6  | 0 | -1.298293 | -1.590366 | -0.000016 | 13                                                                                                 | 6  | 0 | -1.259832 | -1.633975 | -0.000023 | 13                                                                                                | 6  | 0 | -1.334240 | -1.588499 | -0.000023 |
| 14                                                           | 6  | 0 | -1.682516 | -0.178873 | 0.000018  | 14                                                                                                 | 6  | 0 | -1.674533 | -0.217644 | 0.000027  | 14                                                                                                | 6  | 0 | -1.695718 | -0.233950 | 0.000074  |
| 15                                                           | 8  | 0 | -2.090826 | -2.524888 | -0.000092 | 15                                                                                                 | 8  | 0 | -2.025701 | -2.572985 | -0.000337 | 15                                                                                                | 8  | 0 | -2.078279 | -2.605647 | -0.000009 |
| 16                                                           | 6  | 0 | -3.159804 | 0.085711  | 0.000092  | 16                                                                                                 | 6  | 0 | -3.126690 | 0.082161  | -0.000069 | 16                                                                                                | 6  | 0 | -3.159257 | 0.129625  | 0.000230  |
| 17                                                           | 17 | 0 | -1.090404 | 2.463336  | -0.000018 | 17                                                                                                 | 17 | 0 | -1.155738 | 2.423277  | 0.000237  | 17                                                                                                | 17 | 0 | -1.128914 | 2.461491  | -0.000122 |
| 18                                                           | 1  | 0 | -3.627928 | -0.368922 | -0.881668 | 18                                                                                                 | 1  | 0 | -3.719232 | -0.832175 | 0.000129  | 18                                                                                                | 1  | 0 | -3.775156 | -0.773576 | 0.000905  |
| 19                                                           | 1  | 0 | -3.627810 | -0.368793 | 0.882001  | 19                                                                                                 | 1  | 0 | -3.390601 | 0.684373  | 0.880927  | 19                                                                                                | 1  | 0 | -3.436316 | 0.724488  | 0.882156  |
| 20                                                           | 1  | 0 | -3.384971 | 1.152652  | 0.000017  | 20                                                                                                 | 1  | 0 | -3.390519 | 0.683858  | -0.881467 | 20                                                                                                | 1  | 0 | -3.436802 | 0.723470  | -0.882238 |

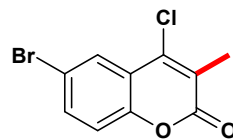

m6

| Initial molecule <b>m6</b><br>$E_{EL} = -3567.09969719$ a.u. |    |   |           |           |           | Radical cation <b>m6<sup>•+</sup></b> with 1 e <sup>-</sup> less<br>$E_{EL} = -3566.86118978$ a.u. |    |   |           |           |           | Radical anion <b>m6<sup>•-</sup></b> with 1 e <sup>-</sup> more<br>$E_{EL} = -3567.20142320$ a.u. |    |   |           |           |           |
|--------------------------------------------------------------|----|---|-----------|-----------|-----------|----------------------------------------------------------------------------------------------------|----|---|-----------|-----------|-----------|---------------------------------------------------------------------------------------------------|----|---|-----------|-----------|-----------|
| Cartesian Coordinates                                        |    |   |           |           |           | Cartesian Coordinates                                                                              |    |   |           |           |           | Cartesian Coordinates                                                                             |    |   |           |           |           |
| 1                                                            | 6  | 0 | 0.424804  | -2.260573 | 0.000068  | 1                                                                                                  | 6  | 0 | 0.457827  | -2.275714 | -0.000125 | 1                                                                                                 | 6  | 0 | 0.426387  | -2.252568 | 0.000005  |
| 2                                                            | 1  | 0 | 0.231411  | -3.328777 | 0.000109  | 2                                                                                                  | 1  | 0 | 0.268214  | -3.343766 | -0.000159 | 2                                                                                                 | 1  | 0 | 0.232816  | -3.322035 | 0.000018  |
| 3                                                            | 6  | 0 | 1.722280  | -1.763975 | 0.000052  | 3                                                                                                  | 6  | 0 | 1.729057  | -1.762343 | -0.000076 | 3                                                                                                 | 6  | 0 | 1.749276  | -1.767034 | -0.000076 |
| 4                                                            | 6  | 0 | 1.924413  | -0.377483 | 0.000009  | 4                                                                                                  | 6  | 0 | 1.920894  | -0.342748 | -0.000022 | 4                                                                                                 | 6  | 0 | 1.936778  | -0.386414 | -0.000023 |
| 5                                                            | 6  | 0 | 0.865167  | 0.515761  | -0.000034 | 5                                                                                                  | 6  | 0 | 0.858414  | 0.546249  | -0.000040 | 5                                                                                                 | 6  | 0 | 0.881264  | 0.518446  | 0.000055  |
| 6                                                            | 6  | 0 | -0.455348 | 0.024575  | -0.000005 | 6                                                                                                  | 6  | 0 | -0.452020 | 0.046199  | -0.000085 | 6                                                                                                 | 6  | 0 | -0.459884 | 0.041624  | 0.000126  |
| 7                                                            | 6  | 0 | -0.646071 | -1.367681 | 0.000024  | 7                                                                                                  | 6  | 0 | -0.633948 | -1.385430 | -0.000099 | 7                                                                                                 | 6  | 0 | -0.642600 | -1.372928 | 0.000152  |
| 8                                                            | 1  | 0 | 2.562925  | -2.450116 | 0.000085  | 8                                                                                                  | 1  | 0 | 2.585709  | -2.428686 | -0.000067 | 8                                                                                                 | 1  | 0 | 2.587014  | -2.455697 | -0.000158 |
| 9                                                            | 35 | 0 | 3.711357  | 0.299885  | -0.000024 | 9                                                                                                  | 35 | 0 | 3.677918  | 0.312013  | 0.000084  | 9                                                                                                 | 35 | 0 | 3.731765  | 0.303357  | -0.000090 |
| 10                                                           | 1  | 0 | 1.045339  | 1.583600  | -0.000066 | 10                                                                                                 | 1  | 0 | 1.033158  | 1.614709  | -0.000003 | 10                                                                                                | 1  | 0 | 1.070657  | 1.585015  | 0.000072  |
| 11                                                           | 6  | 0 | -1.650390 | 0.845672  | -0.000000 | 11                                                                                                 | 6  | 0 | -1.633695 | 0.850872  | -0.000089 | 11                                                                                                | 6  | 0 | -1.635002 | 0.828969  | 0.000148  |
| 12                                                           | 8  | 0 | -1.902411 | -1.909689 | 0.000042  | 12                                                                                                 | 8  | 0 | -1.845609 | -1.931923 | -0.000066 | 12                                                                                                | 8  | 0 | -1.908467 | -1.920173 | 0.000504  |
| 13                                                           | 6  | 0 | -3.039410 | -1.142707 | -0.000014 | 13                                                                                                 | 6  | 0 | -3.016290 | -1.170233 | 0.000029  | 13                                                                                                | 6  | 0 | -3.082073 | -1.124705 | -0.000023 |
| 14                                                           | 6  | 0 | -2.905649 | 0.315724  | -0.000025 | 14                                                                                                 | 6  | 0 | -2.898046 | 0.296269  | 0.000056  | 14                                                                                                | 6  | 0 | -2.942501 | 0.271967  | -0.000099 |
| 15                                                           | 8  | 0 | -4.106657 | -1.740893 | -0.000105 | 15                                                                                                 | 8  | 0 | -4.050612 | -1.795049 | 0.000075  | 15                                                                                                | 8  | 0 | -4.135287 | -1.810922 | -0.000211 |
| 16                                                           | 6  | 0 | -4.198678 | 1.076037  | 0.000002  | 16                                                                                                 | 6  | 0 | -4.158949 | 1.088727  | 0.000277  | 16                                                                                                | 6  | 0 | -4.184092 | 1.126748  | -0.000480 |
| 17                                                           | 17 | 0 | -1.428388 | 2.584488  | 0.000043  | 17                                                                                                 | 17 | 0 | -1.473656 | 2.575519  | -0.000167 | 17                                                                                                | 17 | 0 | -1.464236 | 2.591837  | 0.000229  |
| 18                                                           | 1  | 0 | -4.794558 | 0.810247  | -0.881763 | 18                                                                                                 | 1  | 0 | -5.032370 | 0.436639  | 0.000193  | 18                                                                                                | 1  | 0 | -5.077974 | 0.497890  | -0.000939 |
| 19                                                           | 1  | 0 | -4.794317 | 0.810573  | 0.882037  | 19                                                                                                 | 1  | 0 | -4.199638 | 1.740527  | 0.883142  | 19                                                                                                | 1  | 0 | -4.234130 | 1.779979  | 0.882065  |
| 20                                                           | 1  | 0 | -4.039888 | 2.154765  | -0.000258 | 20                                                                                                 | 1  | 0 | -4.199749 | 1.740993  | -0.882215 | 20                                                                                                | 1  | 0 | -4.233404 | 1.780267  | -0.882850 |

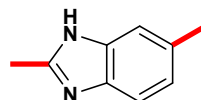

m7

| Initial molecule <b>m7</b><br>$E_{EL} = -458.545081936$ a.u. |   |   |           |           |           | Radical cation <b>m7<sup>•+</sup></b> with 1 e <sup>-</sup> less<br>$E_{EL} = -458.337326490$ a.u. |   |   |           |           |           | Radical anion <b>m7<sup>•-</sup></b> with 1 e <sup>-</sup> more<br>$E_{EL} = -458.582624795$ a.u. |   |   |           |           |           |
|--------------------------------------------------------------|---|---|-----------|-----------|-----------|----------------------------------------------------------------------------------------------------|---|---|-----------|-----------|-----------|---------------------------------------------------------------------------------------------------|---|---|-----------|-----------|-----------|
| Cartesian Coordinates                                        |   |   |           |           |           | Cartesian Coordinates                                                                              |   |   |           |           |           | Cartesian Coordinates                                                                             |   |   |           |           |           |
| 1                                                            | 6 | 0 | 3.784547  | -0.328484 | -0.000099 | 1                                                                                                  | 6 | 0 | 3.761592  | -0.282234 | -0.000250 | 1                                                                                                 | 6 | 0 | 3.771912  | -0.330722 | 0.201348  |
| 2                                                            | 6 | 0 | 2.313792  | -0.080496 | -0.000004 | 2                                                                                                  | 6 | 0 | 2.296227  | -0.108442 | 0.000118  | 2                                                                                                 | 6 | 0 | 2.360019  | -0.097126 | -0.240927 |
| 3                                                            | 7 | 0 | 1.403613  | -1.110146 | 0.000039  | 3                                                                                                  | 7 | 0 | 1.415111  | -1.129459 | 0.000089  | 3                                                                                                 | 7 | 0 | 1.397679  | -1.126800 | -0.065145 |
| 4                                                            | 6 | 0 | 0.136027  | -0.555787 | 0.000107  | 4                                                                                                  | 6 | 0 | 0.137213  | -0.593260 | 0.000162  | 4                                                                                                 | 6 | 0 | 0.143103  | -0.559957 | -0.018296 |
| 5                                                            | 6 | 0 | 0.359456  | 0.839863  | 0.000092  | 5                                                                                                  | 6 | 0 | 0.360676  | 0.834430  | 0.000131  | 5                                                                                                 | 6 | 0 | 0.384688  | 0.852075  | -0.013268 |
| 6                                                            | 7 | 0 | 1.727271  | 1.104043  | 0.000056  | 6                                                                                                  | 7 | 0 | 1.671494  | 1.106993  | 0.000098  | 6                                                                                                 | 7 | 0 | 1.726563  | 1.109866  | -0.094229 |
| 7                                                            | 1 | 0 | 1.632988  | -2.097834 | 0.000018  | 7                                                                                                  | 1 | 0 | 1.657817  | -2.117161 | 0.000705  | 7                                                                                                 | 1 | 0 | 1.575079  | -2.105833 | -0.253101 |
| 8                                                            | 6 | 0 | -0.738487 | 1.712283  | 0.000011  | 8                                                                                                  | 6 | 0 | -0.756705 | 1.727726  | 0.000043  | 8                                                                                                 | 6 | 0 | -0.732891 | 1.727915  | 0.005711  |
| 9                                                            | 6 | 0 | -1.145700 | -1.115746 | 0.000047  | 9                                                                                                  | 6 | 0 | -1.115820 | -1.149723 | 0.000044  | 9                                                                                                 | 6 | 0 | -1.140688 | -1.114176 | -0.017240 |
| 10                                                           | 6 | 0 | -2.017255 | 1.158644  | -0.000058 | 10                                                                                                 | 6 | 0 | -2.009346 | 1.175205  | -0.000065 | 10                                                                                                | 6 | 0 | -2.032851 | 1.159303  | 0.040827  |
| 11                                                           | 6 | 0 | -2.238719 | -0.242872 | -0.000030 | 11                                                                                                 | 6 | 0 | -2.219349 | -0.251635 | -0.000073 | 11                                                                                                | 6 | 0 | -2.260247 | -0.219288 | 0.028924  |
| 12                                                           | 1 | 0 | -0.593612 | 2.790202  | 0.000038  | 12                                                                                                 | 1 | 0 | -0.596183 | 2.801330  | 0.000047  | 12                                                                                                | 1 | 0 | -0.595970 | 2.807819  | 0.012814  |
| 13                                                           | 1 | 0 | -1.291737 | -2.193373 | 0.000106  | 13                                                                                                 | 1 | 0 | -1.278937 | -2.222804 | 0.000045  | 13                                                                                                | 1 | 0 | -1.291418 | -2.192830 | -0.015583 |
| 14                                                           | 1 | 0 | -2.880913 | 1.821055  | -0.000135 | 14                                                                                                 | 1 | 0 | -2.886540 | 1.815770  | -0.000139 | 14                                                                                                | 1 | 0 | -2.892998 | 1.829315  | 0.064795  |
| 15                                                           | 6 | 0 | -3.652819 | -0.779116 | -0.000065 | 15                                                                                                 | 6 | 0 | -3.614155 | -0.775563 | -0.000145 | 15                                                                                                | 6 | 0 | -3.660973 | -0.787740 | 0.044892  |
| 16                                                           | 1 | 0 | 4.319575  | 0.624553  | -0.000432 | 16                                                                                                 | 1 | 0 | 4.187602  | 0.211649  | -0.883181 | 16                                                                                                | 1 | 0 | 4.420226  | 0.483573  | -0.141357 |
| 17                                                           | 1 | 0 | 4.088337  | -0.901311 | 0.885235  | 17                                                                                                 | 1 | 0 | 4.188474  | 0.213776  | 0.881007  | 17                                                                                                | 1 | 0 | 3.865139  | -0.381120 | 1.308851  |
| 18                                                           | 1 | 0 | 4.088083  | -0.901634 | -0.885348 | 18                                                                                                 | 1 | 0 | 4.043542  | -1.337288 | 0.000696  | 18                                                                                                | 1 | 0 | 4.174272  | -1.269990 | -0.198097 |
| 19                                                           | 1 | 0 | -4.210014 | -0.437289 | 0.882434  | 19                                                                                                 | 1 | 0 | -4.159154 | -0.400144 | 0.878451  | 19                                                                                                | 1 | 0 | -4.414763 | 0.007657  | 0.096364  |
| 20                                                           | 1 | 0 | -4.210168 | -0.436844 | -0.882281 | 20                                                                                                 | 1 | 0 | -4.159548 | -0.399193 | -0.878054 | 20                                                                                                | 1 | 0 | -3.874526 | -1.385925 | -0.855495 |
| 21                                                           | 1 | 0 | -3.663781 | -1.874548 | -0.000308 | 21                                                                                                 | 1 | 0 | -3.645314 | -1.867695 | -0.000678 | 21                                                                                                | 1 | 0 | -3.827170 | -1.455826 | 0.904595  |

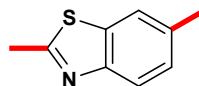

m8

| Initial molecule <b>m8</b><br>$E_{EL} = -801.368351678$ a.u. |    |   |           |           |           | Radical cation <b>m8<sup>•+</sup></b> with 1 e <sup>-</sup> less<br>$E_{EL} = -801.146227736$ a.u. |    |   |           |           |           | Radical anion <b>m8<sup>•-</sup></b> with 1 e <sup>-</sup> more<br>$E_{EL} = -801.425389124$ a.u. |    |   |           |           |           |
|--------------------------------------------------------------|----|---|-----------|-----------|-----------|----------------------------------------------------------------------------------------------------|----|---|-----------|-----------|-----------|---------------------------------------------------------------------------------------------------|----|---|-----------|-----------|-----------|
| Cartesian Coordinates                                        |    |   |           |           |           | Cartesian Coordinates                                                                              |    |   |           |           |           | Cartesian Coordinates                                                                             |    |   |           |           |           |
| 1                                                            | 6  | 0 | -3.784722 | 0.270522  | 0.000141  | 1                                                                                                  | 6  | 0 | -3.743002 | 0.323336  | -0.000218 | 1                                                                                                 | 6  | 0 | -3.763487 | 0.270038  | 0.229217  |
| 2                                                            | 6  | 0 | -2.291849 | 0.212784  | -0.000005 | 2                                                                                                  | 6  | 0 | -2.268501 | 0.193781  | -0.000033 | 2                                                                                                 | 6  | 0 | -2.347575 | 0.218003  | -0.267223 |
| 3                                                            | 16 | 0 | -1.457768 | -1.362549 | -0.000072 | 3                                                                                                  | 16 | 0 | -1.482058 | -1.371540 | 0.000094  | 3                                                                                                 | 16 | 0 | -1.456592 | -1.394367 | -0.052879 |
| 4                                                            | 6  | 0 | 0.080029  | -0.515599 | -0.000010 | 4                                                                                                  | 6  | 0 | 0.071643  | -0.551696 | 0.000219  | 4                                                                                                 | 6  | 0 | 0.078220  | -0.510568 | -0.032939 |
| 5                                                            | 6  | 0 | -0.164319 | 0.875930  | 0.000008  | 5                                                                                                  | 6  | 0 | -0.162624 | 0.871364  | 0.000159  | 5                                                                                                 | 6  | 0 | -0.193953 | 0.902159  | -0.037499 |
| 6                                                            | 7  | 0 | -1.506625 | 1.245745  | -0.000004 | 6                                                                                                  | 7  | 0 | -1.452206 | 1.248848  | 0.000034  | 6                                                                                                 | 7  | 0 | -1.499888 | 1.271346  | -0.068087 |
| 7                                                            | 6  | 0 | 0.925410  | 1.760532  | -0.000044 | 7                                                                                                  | 6  | 0 | 0.952166  | 1.773409  | 0.000103  | 7                                                                                                 | 6  | 0 | 0.929779  | 1.770125  | -0.025230 |
| 8                                                            | 6  | 0 | 1.379343  | -1.034855 | -0.000092 | 8                                                                                                  | 6  | 0 | 1.341775  | -1.067406 | -0.000069 | 8                                                                                                 | 6  | 0 | 1.370694  | -1.016308 | 0.006048  |
| 9                                                            | 6  | 0 | 2.215927  | 1.242370  | -0.000088 | 9                                                                                                  | 6  | 0 | 2.219460  | 1.256731  | -0.000057 | 9                                                                                                 | 6  | 0 | 2.226924  | 1.245038  | 0.017833  |
| 10                                                           | 6  | 0 | 2.463293  | -0.150591 | -0.000080 | 10                                                                                                 | 6  | 0 | 2.449238  | -0.158368 | -0.000125 | 10                                                                                                | 6  | 0 | 2.482393  | -0.136778 | 0.036619  |
| 11                                                           | 1  | 0 | 0.751544  | 2.833608  | -0.000081 | 11                                                                                                 | 1  | 0 | 0.764419  | 2.842578  | 0.000164  | 11                                                                                                | 1  | 0 | 0.773282  | 2.847348  | -0.041815 |
| 12                                                           | 1  | 0 | 1.551094  | -2.108319 | -0.000146 | 12                                                                                                 | 1  | 0 | 1.533568  | -2.136124 | -0.000201 | 12                                                                                                | 1  | 0 | 1.539406  | -2.092575 | 0.019057  |
| 13                                                           | 1  | 0 | 3.062582  | 1.925779  | -0.000137 | 13                                                                                                 | 1  | 0 | 3.080225  | 1.918764  | -0.000111 | 13                                                                                                | 1  | 0 | 3.070047  | 1.935570  | 0.031145  |
| 14                                                           | 6  | 0 | 3.882848  | -0.667378 | 0.000177  | 14                                                                                                 | 6  | 0 | 3.841077  | -0.677476 | -0.000114 | 14                                                                                                | 6  | 0 | 3.891343  | -0.685370 | 0.071674  |
| 15                                                           | 1  | 0 | -4.107801 | 1.315420  | 0.000282  | 15                                                                                                 | 1  | 0 | -4.051966 | 0.898336  | -0.883841 | 15                                                                                                | 1  | 0 | -4.231755 | 1.212539  | -0.083183 |
| 16                                                           | 1  | 0 | -4.199021 | -0.227699 | -0.884965 | 16                                                                                                 | 1  | 0 | -4.249976 | -0.643727 | -0.000563 | 16                                                                                                | 1  | 0 | -4.369810 | -0.552050 | -0.171778 |
| 17                                                           | 1  | 0 | -4.198806 | -0.227846 | 0.885272  | 17                                                                                                 | 1  | 0 | -4.052310 | 0.897856  | 0.883591  | 17                                                                                                | 1  | 0 | -3.834429 | 0.221345  | 1.336197  |
| 18                                                           | 1  | 0 | 4.433969  | -0.313223 | -0.880918 | 18                                                                                                 | 1  | 0 | 4.384596  | -0.293174 | -0.876516 | 18                                                                                                | 1  | 0 | 4.127479  | -1.276351 | -0.826110 |
| 19                                                           | 1  | 0 | 4.432119  | -0.317288 | 0.884079  | 19                                                                                                 | 1  | 0 | 4.383741  | -0.294962 | 0.877636  | 19                                                                                                | 1  | 0 | 4.628922  | 0.123856  | 0.133552  |
| 20                                                           | 1  | 0 | 3.909214  | -1.762159 | -0.002243 | 20                                                                                                 | 1  | 0 | 3.878679  | -1.768886 | -0.001096 | 20                                                                                                | 1  | 0 | 4.055512  | -1.347268 | 0.934602  |

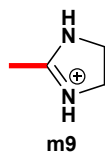

| Initial molecule <b>m9<sup>+</sup></b><br>$E_{EL} = -267.235001920$ a.u. |   |   |           |           |           | Radical dication <b>m9<sup>2+</sup></b> with 1 e <sup>-</sup> less<br>$E_{EL} = -266.972537089$ a.u. |   |   |           |           |           | Radical <b>m9<sup>•</sup></b> with 1 e <sup>-</sup> more<br>$E_{EL} = -267.307796040$ a.u. |   |   |           |           |           |
|--------------------------------------------------------------------------|---|---|-----------|-----------|-----------|------------------------------------------------------------------------------------------------------|---|---|-----------|-----------|-----------|--------------------------------------------------------------------------------------------|---|---|-----------|-----------|-----------|
| Cartesian Coordinates                                                    |   |   |           |           |           | Cartesian Coordinates                                                                                |   |   |           |           |           | Cartesian Coordinates                                                                      |   |   |           |           |           |
| 1                                                                        | 6 | 0 | -2.202039 | 0.000625  | 0.007254  | 1                                                                                                    | 6 | 0 | -2.212460 | 0.002464  | 0.004069  | 1                                                                                          | 6 | 0 | -2.173246 | 0.010377  | 0.114488  |
| 2                                                                        | 6 | 0 | -0.715670 | 0.001315  | -0.013827 | 2                                                                                                    | 6 | 0 | -0.739145 | 0.005082  | -0.010444 | 2                                                                                          | 6 | 0 | -0.739847 | 0.065866  | -0.309061 |
| 3                                                                        | 7 | 0 | 0.036438  | 1.089146  | 0.053463  | 3                                                                                                    | 7 | 0 | 0.054885  | -1.075990 | -0.006947 | 3                                                                                          | 7 | 0 | 0.084289  | 1.130225  | 0.169876  |
| 4                                                                        | 6 | 0 | 1.472899  | 0.771397  | -0.052884 | 4                                                                                                    | 6 | 0 | 1.457572  | -0.761037 | 0.004495  | 4                                                                                          | 6 | 0 | 1.474644  | 0.715803  | -0.080981 |
| 5                                                                        | 6 | 0 | 1.469756  | -0.773556 | 0.066556  | 5                                                                                                    | 6 | 0 | 1.461506  | 0.757561  | 0.005358  | 5                                                                                          | 6 | 0 | 1.396126  | -0.785550 | 0.207276  |
| 6                                                                        | 7 | 0 | 0.035455  | -1.087888 | -0.072776 | 6                                                                                                    | 7 | 0 | 0.058089  | 1.077740  | -0.007638 | 6                                                                                          | 7 | 0 | 0.038318  | -1.126246 | -0.271604 |
| 7                                                                        | 1 | 0 | -0.347244 | -2.025726 | -0.027084 | 7                                                                                                    | 1 | 0 | -0.308408 | 2.036396  | -0.012506 | 7                                                                                          | 1 | 0 | -0.396049 | -1.888196 | 0.249174  |
| 8                                                                        | 1 | 0 | 2.048407  | -1.258759 | -0.721465 | 8                                                                                                    | 1 | 0 | 1.933326  | 1.209435  | 0.893978  | 8                                                                                          | 1 | 0 | 2.166129  | -1.356674 | -0.320926 |
| 9                                                                        | 1 | 0 | 1.854771  | 1.113253  | -1.019613 | 9                                                                                                    | 1 | 0 | 1.930049  | -1.218399 | 0.890606  | 9                                                                                          | 1 | 0 | 1.772882  | 0.893545  | -1.126336 |
| 10                                                                       | 1 | 0 | -0.343153 | 2.027281  | -0.006655 | 10                                                                                                   | 1 | 0 | -0.315885 | -2.033259 | -0.011401 | 10                                                                                         | 1 | 0 | -0.146741 | 2.035709  | -0.233378 |
| 11                                                                       | 1 | 0 | 1.828767  | -1.114908 | 1.042169  | 11                                                                                                   | 1 | 0 | 1.952300  | 1.211639  | -0.871365 | 11                                                                                         | 1 | 0 | 1.495856  | -0.976868 | 1.284993  |
| 12                                                                       | 1 | 0 | 2.034885  | 1.254219  | 0.748529  | 12                                                                                                   | 1 | 0 | 1.946009  | -1.217710 | -0.873039 | 12                                                                                         | 1 | 0 | 2.172263  | 1.240036  | 0.578111  |
| 13                                                                       | 1 | 0 | -2.590886 | -0.868401 | -0.529910 | 13                                                                                                   | 1 | 0 | -2.595742 | 0.989822  | -0.260171 | 13                                                                                         | 1 | 0 | -2.716599 | -0.768874 | -0.433422 |
| 14                                                                       | 1 | 0 | -2.545583 | -0.052232 | 1.047725  | 14                                                                                                   | 1 | 0 | -2.587624 | -0.755193 | -0.690713 | 14                                                                                         | 1 | 0 | -2.274057 | -0.210867 | 1.197331  |
| 15                                                                       | 1 | 0 | -2.592896 | 0.917784  | -0.441100 | 15                                                                                                   | 1 | 0 | -2.549682 | -0.259399 | 1.015844  | 15                                                                                         | 1 | 0 | -2.677999 | 0.965357  | -0.073787 |

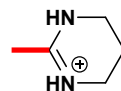

m10

| Initial molecule <b>m10<sup>+</sup></b><br>E <sub>EL</sub> = -306.561651290 a.u. |   |   |           |           |           | Radical dication <b>m10<sup>2+</sup></b> with 1 e <sup>-</sup> less<br>E <sub>EL</sub> = -306.290438118 a.u. |   |   |           |           |           | Radical <b>m10<sup>•</sup></b> with 1 e <sup>-</sup> more<br>E <sub>EL</sub> = -306.620749155 a.u. |   |   |           |           |           |
|----------------------------------------------------------------------------------|---|---|-----------|-----------|-----------|--------------------------------------------------------------------------------------------------------------|---|---|-----------|-----------|-----------|----------------------------------------------------------------------------------------------------|---|---|-----------|-----------|-----------|
| Cartesian Coordinates                                                            |   |   |           |           |           | Cartesian Coordinates                                                                                        |   |   |           |           |           | Cartesian Coordinates                                                                              |   |   |           |           |           |
| 1                                                                                | 6 | 0 | -2.451778 | 0.000353  | 0.126927  | 1                                                                                                            | 6 | 0 | -2.474598 | 0.002417  | 0.108438  | 1                                                                                                  | 6 | 0 | -2.425739 | -0.026452 | 0.162752  |
| 2                                                                                | 6 | 0 | -0.963554 | 0.000715  | -0.034453 | 2                                                                                                            | 6 | 0 | -0.993248 | 0.015274  | 0.006619  | 2                                                                                                  | 6 | 0 | -1.003373 | -0.121446 | -0.310329 |
| 3                                                                                | 7 | 0 | -0.307279 | 1.150402  | -0.089681 | 3                                                                                                            | 7 | 0 | -0.287678 | 1.143356  | -0.056349 | 3                                                                                                  | 7 | 0 | -0.273549 | 1.083636  | -0.509489 |
| 4                                                                                | 6 | 0 | 1.158067  | 1.252729  | -0.182283 | 4                                                                                                            | 6 | 0 | 1.161294  | 1.243245  | -0.178433 | 4                                                                                                  | 6 | 0 | 0.917390  | 1.254854  | 0.343923  |
| 5                                                                                | 6 | 0 | 1.794657  | -0.000479 | 0.414429  | 5                                                                                                            | 6 | 0 | 1.830313  | -0.004815 | 0.376633  | 5                                                                                                  | 6 | 0 | 1.912847  | 0.111927  | 0.082682  |
| 6                                                                                | 7 | 0 | -0.308184 | -1.149681 | -0.090184 | 6                                                                                                            | 7 | 0 | -0.295506 | -1.134619 | -0.069695 | 6                                                                                                  | 7 | 0 | -0.208769 | -1.134225 | 0.285902  |
| 7                                                                                | 1 | 0 | -0.853505 | -2.004356 | -0.047777 | 7                                                                                                            | 1 | 0 | -0.846023 | -2.002482 | -0.116578 | 7                                                                                                  | 1 | 0 | -0.673909 | -2.037695 | 0.250164  |
| 8                                                                                | 1 | 0 | 2.868453  | -0.000779 | 0.205532  | 8                                                                                                            | 1 | 0 | 2.881735  | -0.013700 | 0.082224  | 8                                                                                                  | 1 | 0 | 2.564969  | 0.363341  | -0.762327 |
| 9                                                                                | 1 | 0 | 1.439486  | 1.376460  | -1.234548 | 9                                                                                                            | 1 | 0 | 1.358097  | 1.394163  | -1.256441 | 9                                                                                                  | 1 | 0 | 1.368524  | 2.224848  | 0.113319  |
| 10                                                                               | 1 | 0 | -0.851748 | 2.005575  | -0.047396 | 10                                                                                                           | 1 | 0 | -0.823959 | 2.019976  | -0.072887 | 10                                                                                                 | 1 | 0 | -0.880206 | 1.899506  | -0.488136 |
| 11                                                                               | 1 | 0 | 1.660867  | -0.000284 | 1.502680  | 11                                                                                                           | 1 | 0 | 1.778279  | 0.001259  | 1.470534  | 11                                                                                                 | 1 | 0 | 2.553571  | -0.004847 | 0.965185  |
| 12                                                                               | 1 | 0 | 1.459809  | 2.151177  | 0.361413  | 12                                                                                                           | 1 | 0 | 1.459195  | 2.163735  | 0.332805  | 12                                                                                                 | 1 | 0 | 0.637795  | 1.264159  | 1.409938  |
| 13                                                                               | 6 | 0 | 1.157201  | -1.253356 | -0.182043 | 13                                                                                                           | 6 | 0 | 1.146259  | -1.252194 | -0.160265 | 13                                                                                                 | 6 | 0 | 1.166095  | -1.204765 | -0.230068 |
| 14                                                                               | 1 | 0 | 1.457999  | -2.151755 | 0.362266  | 14                                                                                                           | 1 | 0 | 1.425576  | -2.174866 | 0.361028  | 14                                                                                                 | 1 | 0 | 1.661777  | -2.060916 | 0.236834  |
| 15                                                                               | 1 | 0 | 1.439187  | -1.377834 | -1.234068 | 15                                                                                                           | 1 | 0 | 1.357267  | -1.430031 | -1.235187 | 15                                                                                                 | 1 | 0 | 1.159543  | -1.379480 | -1.319606 |
| 16                                                                               | 1 | 0 | -2.892326 | -0.872141 | -0.363269 | 16                                                                                                           | 1 | 0 | -2.891025 | -0.522994 | -0.759151 | 16                                                                                                 | 1 | 0 | -2.924351 | -1.002820 | 0.116863  |
| 17                                                                               | 1 | 0 | -2.700001 | -0.040486 | 1.194481  | 17                                                                                                           | 1 | 0 | -2.769953 | -0.540153 | 1.013817  | 17                                                                                                 | 1 | 0 | -2.494758 | 0.333818  | 1.209981  |
| 18                                                                               | 1 | 0 | -2.887531 | 0.909598  | -0.295712 | 18                                                                                                           | 1 | 0 | -2.867017 | 1.020382  | 0.144184  | 18                                                                                                 | 1 | 0 | -3.000045 | 0.669494  | -0.460862 |



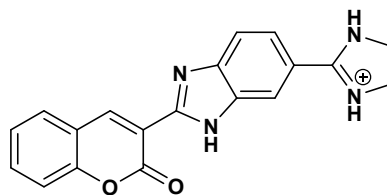

m11

| Initial molecule <b>m11</b> <sup>+</sup><br>E <sub>EL</sub> = -1102.48498369 a.u. |   |   |           |           |           | Radical dication <b>m11</b> <sup>2+</sup> with 1 e <sup>-</sup> less<br>E <sub>EL</sub> = -1102.26104723 a.u. |   |   |           |           |           | Radical <b>m11</b> <sup>•</sup> with 1 e <sup>-</sup> more<br>E <sub>EL</sub> = -1102.59899385 a.u. |   |   |           |           |           |
|-----------------------------------------------------------------------------------|---|---|-----------|-----------|-----------|---------------------------------------------------------------------------------------------------------------|---|---|-----------|-----------|-----------|-----------------------------------------------------------------------------------------------------|---|---|-----------|-----------|-----------|
| Cartesian Coordinates                                                             |   |   |           |           |           | Cartesian Coordinates                                                                                         |   |   |           |           |           | Cartesian Coordinates                                                                               |   |   |           |           |           |
| 1                                                                                 | 6 | 0 | -6.250587 | -1.075472 | -0.052036 | 1                                                                                                             | 6 | 0 | 6.227857  | -1.039628 | 0.075785  | 1                                                                                                   | 6 | 0 | 6.239671  | -1.091351 | 0.046421  |
| 2                                                                                 | 1 | 0 | -6.523023 | -2.125375 | -0.101230 | 2                                                                                                             | 1 | 0 | 6.528189  | -2.081040 | 0.128351  | 2                                                                                                   | 1 | 0 | 6.482483  | -2.150297 | 0.086131  |
| 3                                                                                 | 6 | 0 | -7.213098 | -0.069040 | -0.002015 | 3                                                                                                             | 6 | 0 | 7.166146  | -0.007074 | 0.032557  | 3                                                                                                   | 6 | 0 | 7.247350  | -0.113879 | 0.008853  |
| 4                                                                                 | 6 | 0 | -6.841429 | 1.287492  | 0.060999  | 4                                                                                                             | 6 | 0 | 6.775623  | 1.349874  | -0.035220 | 4                                                                                                   | 6 | 0 | 6.894034  | 1.245659  | -0.042021 |
| 5                                                                                 | 6 | 0 | -5.500129 | 1.641003  | 0.074430  | 5                                                                                                             | 6 | 0 | 5.436831  | 1.678691  | -0.060194 | 5                                                                                                   | 6 | 0 | 5.557500  | 1.630792  | -0.055761 |
| 6                                                                                 | 6 | 0 | -4.502498 | 0.641022  | 0.025081  | 6                                                                                                             | 6 | 0 | 4.451532  | 0.650735  | -0.017704 | 6                                                                                                   | 6 | 0 | 4.511633  | 0.665002  | -0.019208 |
| 7                                                                                 | 6 | 0 | -4.907666 | -0.705324 | -0.037740 | 7                                                                                                             | 6 | 0 | 4.882419  | -0.703063 | 0.050376  | 7                                                                                                   | 6 | 0 | 4.910303  | -0.697289 | 0.032090  |
| 8                                                                                 | 1 | 0 | -8.265319 | -0.339916 | -0.012205 | 8                                                                                                             | 1 | 0 | 8.223118  | -0.257208 | 0.052052  | 8                                                                                                   | 1 | 0 | 8.291713  | -0.413606 | 0.019517  |
| 9                                                                                 | 1 | 0 | -7.607706 | 2.056422  | 0.099252  | 9                                                                                                             | 1 | 0 | 7.533390  | 2.126422  | -0.067197 | 9                                                                                                   | 1 | 0 | 7.671761  | 2.005627  | -0.071035 |
| 10                                                                                | 1 | 0 | -5.196148 | 2.683291  | 0.123189  | 10                                                                                                            | 1 | 0 | 5.107297  | 2.712248  | -0.112208 | 10                                                                                                  | 1 | 0 | 5.289393  | 2.684488  | -0.095200 |
| 11                                                                                | 6 | 0 | -3.102188 | 0.916187  | 0.037023  | 11                                                                                                            | 6 | 0 | 3.072486  | 0.912165  | -0.042091 | 11                                                                                                  | 6 | 0 | 3.131588  | 0.965431  | -0.031278 |
| 12                                                                                | 8 | 0 | -3.969016 | -1.706972 | -0.087698 | 12                                                                                                            | 8 | 0 | 3.972240  | -1.722202 | 0.094040  | 12                                                                                                  | 8 | 0 | 3.950249  | -1.701707 | 0.070324  |
| 13                                                                                | 6 | 0 | -2.618378 | -1.477345 | -0.079176 | 13                                                                                                            | 6 | 0 | 2.619866  | -1.521644 | 0.075305  | 13                                                                                                  | 6 | 0 | 2.586549  | -1.441194 | 0.059728  |
| 14                                                                                | 6 | 0 | -2.172350 | -0.089098 | -0.011776 | 14                                                                                                            | 6 | 0 | 2.147447  | -0.130032 | -0.001123 | 14                                                                                                  | 6 | 0 | 2.159046  | -0.080350 | 0.008094  |
| 15                                                                                | 8 | 0 | -1.894843 | -2.468402 | -0.129614 | 15                                                                                                            | 8 | 0 | 1.905698  | -2.508784 | 0.123857  | 15                                                                                                  | 8 | 0 | 1.872349  | -2.462045 | 0.097591  |
| 16                                                                                | 6 | 0 | -0.741033 | 0.212597  | 0.003977  | 16                                                                                                            | 6 | 0 | 0.750428  | 0.143098  | -0.028164 | 16                                                                                                  | 6 | 0 | 0.755806  | 0.212517  | -0.005816 |
| 17                                                                                | 1 | 0 | -2.770883 | 1.949517  | 0.086732  | 17                                                                                                            | 1 | 0 | 2.719787  | 1.937669  | -0.094732 | 17                                                                                                  | 1 | 0 | 2.803326  | 1.998483  | -0.070438 |
| 18                                                                                | 7 | 0 | 0.232331  | -0.750095 | -0.033902 | 18                                                                                                            | 7 | 0 | -0.234115 | -0.804601 | 0.005956  | 18                                                                                                  | 7 | 0 | -0.235366 | -0.749840 | 0.030716  |
| 19                                                                                | 6 | 0 | 1.449765  | -0.107677 | 0.001726  | 19                                                                                                            | 6 | 0 | -1.434359 | -0.153360 | -0.031606 | 19                                                                                                  | 6 | 0 | -1.454832 | -0.109896 | -0.002123 |
| 20                                                                                | 6 | 0 | 1.127564  | 1.275466  | 0.057338  | 20                                                                                                            | 6 | 0 | -1.093355 | 1.247986  | -0.089855 | 20                                                                                                  | 6 | 0 | -1.128566 | 1.279280  | -0.054469 |
| 21                                                                                | 7 | 0 | -0.237301 | 1.444193  | 0.058617  | 21                                                                                                            | 7 | 0 | 0.237154  | 1.407488  | -0.089124 | 21                                                                                                  | 7 | 0 | 0.226393  | 1.454767  | -0.056385 |
| 22                                                                                | 1 | 0 | 0.043121  | -1.747820 | -0.078972 | 22                                                                                                            | 1 | 0 | -0.062729 | -1.807697 | 0.056836  | 22                                                                                                  | 1 | 0 | -0.036437 | -1.744988 | 0.067348  |
| 23                                                                                | 6 | 0 | 2.157678  | 2.229876  | 0.098455  | 23                                                                                                            | 6 | 0 | -2.124618 | 2.226440  | -0.132791 | 23                                                                                                  | 6 | 0 | -2.167853 | 2.228598  | -0.092871 |
| 24                                                                                | 6 | 0 | 2.757901  | -0.576662 | -0.014243 | 24                                                                                                            | 6 | 0 | -2.747203 | -0.605362 | -0.013025 | 24                                                                                                  | 6 | 0 | -2.757791 | -0.575847 | 0.015125  |
| 25                                                                                | 6 | 0 | 3.468540  | 1.778249  | 0.078337  | 25                                                                                                            | 6 | 0 | -3.423755 | 1.783964  | -0.107685 | 25                                                                                                  | 6 | 0 | -3.479931 | 1.776505  | -0.072368 |
| 26                                                                                | 6 | 0 | 3.775939  | 0.390622  | 0.022986  | 26                                                                                                            | 6 | 0 | -3.737869 | 0.382609  | -0.047155 | 26                                                                                                  | 6 | 0 | -3.793214 | 0.391130  | -0.018662 |

|    |   |   |          |           |           |    |   |   |           |           |           |    |   |   |           |           |           |
|----|---|---|----------|-----------|-----------|----|---|---|-----------|-----------|-----------|----|---|---|-----------|-----------|-----------|
| 27 | 1 | 0 | 1.932957 | 3.291314  | 0.150909  | 27 | 1 | 0 | -1.881184 | 3.282599  | -0.186464 | 27 | 1 | 0 | -1.947002 | 3.291325  | -0.145040 |
| 28 | 1 | 0 | 2.973176 | -1.638882 | -0.079695 | 28 | 1 | 0 | -2.983170 | -1.662185 | 0.052481  | 28 | 1 | 0 | -2.968205 | -1.639150 | 0.081767  |
| 29 | 1 | 0 | 4.273525 | 2.504806  | 0.132342  | 29 | 1 | 0 | -4.232044 | 2.506105  | -0.155736 | 29 | 1 | 0 | -4.281158 | 2.507933  | -0.126594 |
| 30 | 6 | 0 | 5.173444 | -0.038854 | 0.005007  | 30 | 6 | 0 | -5.151118 | -0.027541 | -0.006661 | 30 | 6 | 0 | -5.177982 | -0.036475 | -0.002584 |
| 31 | 7 | 0 | 5.598266 | -1.254854 | 0.350035  | 31 | 7 | 0 | -5.605387 | -1.204771 | -0.419298 | 31 | 7 | 0 | -5.597865 | -1.286341 | -0.247424 |
| 32 | 6 | 0 | 7.071442 | -1.324595 | 0.365919  | 32 | 6 | 0 | -7.080349 | -1.254112 | -0.362963 | 32 | 6 | 0 | -7.068174 | -1.347193 | -0.327016 |
| 33 | 6 | 0 | 7.457756 | -0.043511 | -0.403125 | 33 | 6 | 0 | -7.407776 | -0.016845 | 0.501888  | 33 | 6 | 0 | -7.470928 | -0.034360 | 0.368858  |
| 34 | 7 | 0 | 6.201613 | 0.728299  | -0.357457 | 34 | 7 | 0 | -6.136281 | 0.732337  | 0.455657  | 34 | 7 | 0 | -6.230139 | 0.753959  | 0.259491  |
| 35 | 1 | 0 | 6.078416 | 1.584674  | -0.886277 | 35 | 1 | 0 | -5.973975 | 1.567905  | 1.008677  | 35 | 1 | 0 | -6.124089 | 1.630027  | 0.758004  |
| 36 | 1 | 0 | 8.270280 | 0.509555  | 0.071029  | 36 | 1 | 0 | -8.222863 | 0.584445  | 0.096306  | 36 | 1 | 0 | -8.301425 | 0.472782  | -0.125273 |
| 37 | 1 | 0 | 7.426067 | -1.307486 | 1.401693  | 37 | 1 | 0 | -7.482288 | -1.171552 | -1.377611 | 37 | 1 | 0 | -7.380012 | -1.367359 | -1.377409 |
| 38 | 1 | 0 | 5.025603 | -1.893227 | 0.891340  | 38 | 1 | 0 | -5.060399 | -1.832999 | -1.001216 | 38 | 1 | 0 | -5.018941 | -1.952630 | -0.746041 |
| 39 | 1 | 0 | 7.719964 | -0.250664 | -1.445919 | 39 | 1 | 0 | -7.631209 | -0.281793 | 1.540093  | 39 | 1 | 0 | -7.717258 | -0.188824 | 1.425573  |
| 40 | 1 | 0 | 7.422423 | -2.235637 | -0.121739 | 40 | 1 | 0 | -7.416432 | -2.189609 | 0.086799  | 40 | 1 | 0 | -7.451352 | -2.234101 | 0.180649  |

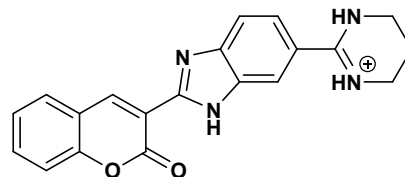

m12

| Initial molecule <b>m12</b> <sup>+</sup><br>E <sub>EL</sub> = -1141.80976118 a.u. |   |   |           |           |           | Radical dication <b>m12</b> <sup>*2+</sup> with 1 e <sup>-</sup> less<br>E <sub>EL</sub> = -1141.58757662 a.u. |   |   |           |           |           | Radical <b>m12</b> <sup>*</sup> with 1 e <sup>-</sup> more<br>E <sub>EL</sub> = -1141.92237631 a.u. |   |   |           |           |           |
|-----------------------------------------------------------------------------------|---|---|-----------|-----------|-----------|----------------------------------------------------------------------------------------------------------------|---|---|-----------|-----------|-----------|-----------------------------------------------------------------------------------------------------|---|---|-----------|-----------|-----------|
| Cartesian Coordinates                                                             |   |   |           |           |           | Cartesian Coordinates                                                                                          |   |   |           |           |           | Cartesian Coordinates                                                                               |   |   |           |           |           |
| 1                                                                                 | 6 | 0 | -6.561636 | -1.139239 | -0.090194 | 1                                                                                                              | 6 | 0 | -6.536346 | -1.103717 | -0.116116 | 1                                                                                                   | 6 | 0 | -6.550141 | -1.155957 | -0.087106 |
| 2                                                                                 | 1 | 0 | -6.814772 | -2.192679 | -0.162265 | 2                                                                                                              | 1 | 0 | -6.817747 | -2.149438 | -0.186211 | 2                                                                                                   | 1 | 0 | -6.772811 | -2.217813 | -0.157536 |
| 3                                                                                 | 6 | 0 | -7.542409 | -0.152120 | -0.015762 | 3                                                                                                              | 6 | 0 | -7.493044 | -0.088977 | -0.058447 | 3                                                                                                   | 6 | 0 | -7.577327 | -0.199967 | -0.016196 |
| 4                                                                                 | 6 | 0 | -7.195335 | 1.209213  | 0.076876  | 4                                                                                                              | 6 | 0 | -7.126535 | 1.272994  | 0.031154  | 4                                                                                                   | 6 | 0 | -7.249871 | 1.163784  | 0.074080  |
| 5                                                                                 | 6 | 0 | -5.860606 | 1.586918  | 0.095942  | 5                                                                                                              | 6 | 0 | -5.793351 | 1.624970  | 0.065027  | 5                                                                                                   | 6 | 0 | -5.920679 | 1.574213  | 0.094061  |
| 6                                                                                 | 6 | 0 | -4.844967 | 0.606872  | 0.022663  | 6                                                                                                              | 6 | 0 | -4.790519 | 0.615688  | 0.009076  | 6                                                                                                   | 6 | 0 | -4.855697 | 0.630853  | 0.024465  |
| 7                                                                                 | 6 | 0 | -5.225686 | -0.744777 | -0.069653 | 7                                                                                                              | 6 | 0 | -5.196987 | -0.743367 | -0.082431 | 7                                                                                                   | 6 | 0 | -5.228478 | -0.737526 | -0.066139 |
| 8                                                                                 | 1 | 0 | -8.589483 | -0.442045 | -0.030014 | 8                                                                                                              | 1 | 0 | -8.545366 | -0.357447 | -0.084404 | 8                                                                                                   | 1 | 0 | -8.615654 | -0.519841 | -0.031649 |
| 9                                                                                 | 1 | 0 | -7.975438 | 1.962925  | 0.134007  | 9                                                                                                              | 1 | 0 | -7.897780 | 2.035703  | 0.073093  | 9                                                                                                   | 1 | 0 | -8.041817 | 1.907523  | 0.129409  |
| 10                                                                                | 1 | 0 | -5.575936 | 2.633334  | 0.167912  | 10                                                                                                             | 1 | 0 | -5.482202 | 2.663277  | 0.134230  | 10                                                                                                  | 1 | 0 | -5.673086 | 2.631378  | 0.164533  |
| 11                                                                                | 6 | 0 | -3.449678 | 0.907053  | 0.041483  | 11                                                                                                             | 6 | 0 | -3.415661 | 0.900525  | 0.044619  | 11                                                                                                  | 6 | 0 | -3.481911 | 0.956812  | 0.041669  |
| 12                                                                                | 8 | 0 | -4.268633 | -1.727492 | -0.142935 | 12                                                                                                             | 8 | 0 | -4.268027 | -1.745356 | -0.142094 | 12                                                                                                  | 8 | 0 | -4.249826 | -1.722120 | -0.138120 |
| 13                                                                                | 6 | 0 | -2.922253 | -1.473525 | -0.128325 | 13                                                                                                             | 6 | 0 | -2.919406 | -1.521163 | -0.117818 | 13                                                                                                  | 6 | 0 | -2.888487 | -1.434464 | -0.119677 |
| 14                                                                                | 6 | 0 | -2.501344 | -0.079275 | -0.029222 | 14                                                                                                             | 6 | 0 | -2.472301 | -0.123462 | -0.012783 | 14                                                                                                  | 6 | 0 | -2.489660 | -0.070972 | -0.029113 |
| 15                                                                                | 8 | 0 | -2.181210 | -2.450269 | -0.201017 | 15                                                                                                             | 8 | 0 | -2.187713 | -2.494663 | -0.184732 | 15                                                                                                  | 8 | 0 | -2.156572 | -2.443747 | -0.187338 |
| 16                                                                                | 6 | 0 | -1.075367 | 0.248252  | 0.000917  | 16                                                                                                             | 6 | 0 | -1.080406 | 0.174017  | 0.032012  | 16                                                                                                  | 6 | 0 | -1.090310 | 0.252685  | -0.001506 |
| 17                                                                                | 1 | 0 | -3.137531 | 1.944911  | 0.115594  | 17                                                                                                             | 1 | 0 | -3.081514 | 1.931019  | 0.118179  | 17                                                                                                  | 1 | 0 | -3.171962 | 1.993862  | 0.111795  |
| 18                                                                                | 7 | 0 | -0.083753 | -0.696445 | -0.055041 | 18                                                                                                             | 7 | 0 | -0.078380 | -0.753816 | -0.023331 | 18                                                                                                  | 7 | 0 | -0.082303 | -0.691650 | -0.056619 |
| 19                                                                                | 6 | 0 | 1.121377  | -0.034303 | 0.011513  | 19                                                                                                             | 6 | 0 | 1.109942  | -0.082934 | 0.049937  | 19                                                                                                  | 6 | 0 | 1.124884  | -0.032255 | 0.008210  |
| 20                                                                                | 6 | 0 | 0.775132  | 1.340135  | 0.100647  | 20                                                                                                             | 6 | 0 | 0.742350  | 1.309379  | 0.151464  | 20                                                                                                  | 6 | 0 | 0.776651  | 1.347563  | 0.093273  |
| 21                                                                                | 7 | 0 | -0.594557 | 1.485287  | 0.093227  | 21                                                                                                             | 7 | 0 | -0.590699 | 1.445015  | 0.139695  | 21                                                                                                  | 7 | 0 | -0.586684 | 1.499707  | 0.086711  |
| 22                                                                                | 1 | 0 | -0.254310 | -1.695699 | -0.127544 | 22                                                                                                             | 1 | 0 | -0.230569 | -1.757573 | -0.108207 | 22                                                                                                  | 1 | 0 | -0.265169 | -1.688574 | -0.121967 |
| 23                                                                                | 6 | 0 | 1.788189  | 2.308822  | 0.179639  | 23                                                                                                             | 6 | 0 | 1.754840  | 2.304417  | 0.242795  | 23                                                                                                  | 6 | 0 | 1.798052  | 2.309604  | 0.167177  |
| 24                                                                                | 6 | 0 | 2.439484  | -0.481495 | 0.000326  | 24                                                                                                             | 6 | 0 | 2.431381  | -0.509847 | 0.030726  | 24                                                                                                  | 6 | 0 | 2.438520  | -0.477977 | -0.003603 |
| 25                                                                                | 6 | 0 | 3.108012  | 1.878164  | 0.166222  | 25                                                                                                             | 6 | 0 | 3.062622  | 1.885920  | 0.217940  | 25                                                                                                  | 6 | 0 | 3.120891  | 1.877406  | 0.152706  |
| 26                                                                                | 6 | 0 | 3.439204  | 0.499029  | 0.080321  | 26                                                                                                             | 6 | 0 | 3.402745  | 0.493819  | 0.110483  | 26                                                                                                  | 6 | 0 | 3.453088  | 0.501599  | 0.070623  |

|    |   |   |          |           |           |    |   |   |          |           |           |    |   |   |          |           |           |
|----|---|---|----------|-----------|-----------|----|---|---|----------|-----------|-----------|----|---|---|----------|-----------|-----------|
| 27 | 1 | 0 | 1.546119 | 3.364845  | 0.259767  | 27 | 1 | 0 | 1.491084 | 3.353145  | 0.334322  | 27 | 1 | 0 | 1.561062 | 3.367297  | 0.247001  |
| 28 | 1 | 0 | 2.674223 | -1.537842 | -0.092267 | 28 | 1 | 0 | 2.691055 | -1.558674 | -0.068384 | 28 | 1 | 0 | 2.669531 | -1.535170 | -0.099675 |
| 29 | 1 | 0 | 3.902694 | 2.613322  | 0.253889  | 29 | 1 | 0 | 3.861148 | 2.616244  | 0.303175  | 29 | 1 | 0 | 3.913410 | 2.615039  | 0.243410  |
| 30 | 6 | 0 | 4.860741 | 0.090962  | 0.082706  | 30 | 6 | 0 | 4.838506 | 0.106617  | 0.078076  | 30 | 6 | 0 | 4.865366 | 0.089646  | 0.079617  |
| 31 | 7 | 0 | 5.228221 | -1.026064 | 0.701955  | 31 | 7 | 0 | 5.247474 | -0.939416 | 0.781001  | 31 | 7 | 0 | 5.222018 | -1.057095 | 0.656901  |
| 32 | 6 | 0 | 6.598761 | -1.562850 | 0.704346  | 32 | 6 | 0 | 6.635793 | -1.432023 | 0.779567  | 32 | 6 | 0 | 6.587978 | -1.602507 | 0.660405  |
| 33 | 6 | 0 | 7.380005 | -0.999367 | -0.478662 | 33 | 6 | 0 | 7.335720 | -0.996657 | -0.504240 | 33 | 6 | 0 | 7.397434 | -0.989998 | -0.478248 |
| 34 | 7 | 0 | 5.770541 | 0.840332  | -0.531928 | 34 | 7 | 0 | 5.687849 | 0.808705  | -0.658158 | 34 | 7 | 0 | 5.796091 | 0.856630  | -0.487944 |
| 35 | 1 | 0 | 5.448319 | 1.626256  | -1.085120 | 35 | 1 | 0 | 5.318382 | 1.550399  | -1.244127 | 35 | 1 | 0 | 5.489377 | 1.655733  | -1.030118 |
| 36 | 1 | 0 | 8.439777 | -1.245607 | -0.364518 | 36 | 1 | 0 | 8.405938 | -1.206772 | -0.422412 | 36 | 1 | 0 | 8.453490 | -1.247363 | -0.353247 |
| 37 | 1 | 0 | 7.077122 | -1.297846 | 1.654461  | 37 | 1 | 0 | 7.146269 | -1.036461 | 1.664993  | 37 | 1 | 0 | 7.051183 | -1.385888 | 1.630498  |
| 38 | 1 | 0 | 4.527531 | -1.514071 | 1.249160  | 38 | 1 | 0 | 4.579460 | -1.394639 | 1.394681  | 38 | 1 | 0 | 4.514546 | -1.556049 | 1.184476  |
| 39 | 1 | 0 | 7.024790 | -1.451304 | -1.412258 | 39 | 1 | 0 | 6.942135 | -1.564727 | -1.355096 | 39 | 1 | 0 | 7.060235 | -1.395323 | -1.439632 |
| 40 | 1 | 0 | 6.524993 | -2.652348 | 0.651177  | 40 | 1 | 0 | 6.594024 | -2.520649 | 0.864832  | 40 | 1 | 0 | 6.510676 | -2.688254 | 0.555031  |
| 41 | 6 | 0 | 7.205346 | 0.516148  | -0.545094 | 41 | 6 | 0 | 7.124896 | 0.496767  | -0.742376 | 41 | 6 | 0 | 7.228675 | 0.527676  | -0.476350 |
| 42 | 1 | 0 | 7.624323 | 0.929646  | -1.464706 | 42 | 1 | 0 | 7.465160 | 0.798392  | -1.734939 | 42 | 1 | 0 | 7.675164 | 0.982690  | -1.362973 |
| 43 | 1 | 0 | 7.691336 | 1.006814  | 0.306714  | 43 | 1 | 0 | 7.657302 | 1.097142  | 0.004442  | 43 | 1 | 0 | 7.695289 | 0.973246  | 0.410873  |

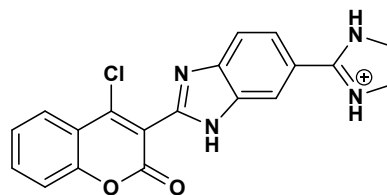

7

| Initial molecule <b>7<sup>+</sup></b><br>$E_{EL} = -1562.06478399$ a.u. |    |   |           |           |           | Radical dication <b>7<sup>2+</sup></b> with 1 e <sup>-</sup> less<br>$E_{EL} = -1561.83107016$ a.u. |    |   |           |           |           | Radical <b>7<sup>•</sup></b> with 1 e <sup>-</sup> more<br>$E_{EL} = -1562.17894092$ a.u. |    |   |           |           |           |
|-------------------------------------------------------------------------|----|---|-----------|-----------|-----------|-----------------------------------------------------------------------------------------------------|----|---|-----------|-----------|-----------|-------------------------------------------------------------------------------------------|----|---|-----------|-----------|-----------|
| Cartesian Coordinates                                                   |    |   |           |           |           | Cartesian Coordinates                                                                               |    |   |           |           |           | Cartesian Coordinates                                                                     |    |   |           |           |           |
| 1                                                                       | 6  | 0 | -6.027240 | 1.274820  | -0.264659 | 1                                                                                                   | 6  | 0 | -5.822221 | 1.687409  | -0.063453 | 1                                                                                         | 6  | 0 | -6.007592 | 1.373805  | 0.308557  |
| 2                                                                       | 1  | 0 | -6.316102 | 2.316205  | -0.160854 | 2                                                                                                   | 1  | 0 | -5.971637 | 2.744504  | 0.131267  | 2                                                                                         | 1  | 0 | -6.240176 | 2.413866  | 0.522286  |
| 3                                                                       | 6  | 0 | -6.959707 | 0.276841  | -0.529134 | 3                                                                                                   | 6  | 0 | -6.869865 | 0.851593  | -0.432819 | 3                                                                                         | 6  | 0 | -7.020935 | 0.415095  | 0.163284  |
| 4                                                                       | 6  | 0 | -6.555751 | -1.063209 | -0.657962 | 4                                                                                                   | 6  | 0 | -6.650965 | -0.521929 | -0.679426 | 4                                                                                         | 6  | 0 | -6.676125 | -0.909263 | -0.141227 |
| 5                                                                       | 6  | 0 | -5.218175 | -1.406367 | -0.523800 | 5                                                                                                   | 6  | 0 | -5.385016 | -1.056438 | -0.561844 | 5                                                                                         | 6  | 0 | -5.342008 | -1.282016 | -0.287182 |
| 6                                                                       | 6  | 0 | -4.251293 | -0.414101 | -0.254345 | 6                                                                                                   | 6  | 0 | -4.290039 | -0.231737 | -0.183760 | 6                                                                                         | 6  | 0 | -4.292295 | -0.337384 | -0.126717 |
| 7                                                                       | 6  | 0 | -4.685985 | 0.919955  | -0.129530 | 7                                                                                                   | 6  | 0 | -4.548385 | 1.143033  | 0.061978  | 7                                                                                         | 6  | 0 | -4.679919 | 0.998495  | 0.157212  |
| 8                                                                       | 1  | 0 | -8.008249 | 0.540525  | -0.635608 | 8                                                                                                   | 1  | 0 | -7.870058 | 1.263428  | -0.531380 | 8                                                                                         | 1  | 0 | -8.061771 | 0.705230  | 0.277717  |
| 9                                                                       | 1  | 0 | -7.291287 | -1.835183 | -0.863444 | 9                                                                                                   | 1  | 0 | -7.482811 | -1.158587 | -0.963443 | 9                                                                                         | 1  | 0 | -7.454151 | -1.658808 | -0.265754 |
| 10                                                                      | 1  | 0 | -4.911271 | -2.441545 | -0.625152 | 10                                                                                                  | 1  | 0 | -5.222918 | -2.110396 | -0.753811 | 10                                                                                        | 1  | 0 | -5.094475 | -2.312329 | -0.521104 |
| 11                                                                      | 6  | 0 | -2.835395 | -0.645573 | -0.100483 | 11                                                                                                  | 6  | 0 | -2.942008 | -0.674133 | -0.068030 | 11                                                                                        | 6  | 0 | -2.898463 | -0.594961 | -0.228755 |
| 12                                                                      | 8  | 0 | -3.802452 | 1.935505  | 0.135565  | 12                                                                                                  | 8  | 0 | -3.552808 | 1.993476  | 0.432857  | 12                                                                                        | 8  | 0 | -3.733631 | 2.000978  | 0.262278  |
| 13                                                                      | 6  | 0 | -2.457796 | 1.734332  | 0.301535  | 13                                                                                                  | 6  | 0 | -2.257509 | 1.597653  | 0.632842  | 13                                                                                        | 6  | 0 | -2.354499 | 1.766312  | 0.207740  |
| 14                                                                      | 6  | 0 | -1.959218 | 0.368228  | 0.165147  | 14                                                                                                  | 6  | 0 | -1.911404 | 0.198899  | 0.289891  | 14                                                                                        | 6  | 0 | -1.913122 | 0.427894  | -0.017864 |
| 15                                                                      | 8  | 0 | -1.771931 | 2.713249  | 0.556779  | 15                                                                                                  | 8  | 0 | -1.497648 | 2.415003  | 1.107933  | 15                                                                                        | 8  | 0 | -1.673616 | 2.783801  | 0.401686  |
| 16                                                                      | 6  | 0 | -0.499550 | 0.179081  | 0.308133  | 16                                                                                                  | 6  | 0 | -0.507642 | -0.119181 | 0.325103  | 16                                                                                        | 6  | 0 | -0.489678 | 0.157251  | 0.076840  |
| 17                                                                      | 17 | 0 | -2.237482 | -2.274418 | -0.284578 | 17                                                                                                  | 17 | 0 | -2.598872 | -2.321352 | -0.490004 | 17                                                                                        | 17 | 0 | -2.412571 | -2.154598 | -0.921174 |
| 18                                                                      | 7  | 0 | 0.395031  | 0.523756  | -0.594987 | 18                                                                                                  | 7  | 0 | 0.447755  | 0.784305  | -0.041554 | 18                                                                                        | 7  | 0 | 0.507441  | 0.936938  | -0.343678 |
| 19                                                                      | 6  | 0 | 1.617124  | 0.177012  | -0.036479 | 19                                                                                                  | 6  | 0 | 1.614300  | 0.137382  | 0.077301  | 19                                                                                        | 6  | 0 | 1.670625  | 0.264509  | -0.026141 |
| 20                                                                      | 6  | 0 | 1.422172  | -0.387758 | 1.249945  | 20                                                                                                  | 6  | 0 | 1.406784  | -1.203247 | 0.554274  | 20                                                                                        | 6  | 0 | 1.368450  | -0.972174 | 0.607201  |
| 21                                                                      | 7  | 0 | 0.061647  | -0.370303 | 1.436713  | 21                                                                                                  | 7  | 0 | 0.046976  | -1.319747 | 0.675112  | 21                                                                                        | 7  | 0 | 0.001496  | -1.008913 | 0.657655  |
| 22                                                                      | 6  | 0 | 2.486176  | -0.823018 | 2.047938  | 22                                                                                                  | 6  | 0 | 2.458411  | -2.076020 | 0.793835  | 22                                                                                        | 6  | 0 | 2.361461  | -1.858823 | 1.035223  |
| 23                                                                      | 6  | 0 | 2.904576  | 0.315227  | -0.555647 | 23                                                                                                  | 6  | 0 | 2.926020  | 0.612486  | -0.191945 | 23                                                                                        | 6  | 0 | 2.999150  | 0.625212  | -0.246453 |
| 24                                                                      | 6  | 0 | 3.763216  | -0.674800 | 1.525879  | 24                                                                                                  | 6  | 0 | 3.738077  | -1.585692 | 0.536855  | 24                                                                                        | 6  | 0 | 3.683650  | -1.486000 | 0.815923  |
| 25                                                                      | 6  | 0 | 3.977950  | -0.112914 | 0.237735  | 25                                                                                                  | 6  | 0 | 3.974832  | -0.255483 | 0.047308  | 25                                                                                        | 6  | 0 | 4.008724  | -0.260380 | 0.177474  |
| 26                                                                      | 1  | 0 | 2.325725  | -1.262406 | 3.027685  | 26                                                                                                  | 1  | 0 | 2.306729  | -3.089569 | 1.149114  | 26                                                                                        | 1  | 0 | 2.117776  | -2.803645 | 1.512236  |

|    |   |   |           |           |           |    |   |   |           |           |           |    |   |   |           |           |           |
|----|---|---|-----------|-----------|-----------|----|---|---|-----------|-----------|-----------|----|---|---|-----------|-----------|-----------|
| 27 | 1 | 0 | 3.059025  | 0.767650  | -1.530899 | 27 | 1 | 0 | 3.069548  | 1.630106  | -0.540606 | 27 | 1 | 0 | 3.234852  | 1.578705  | -0.709781 |
| 28 | 1 | 0 | 4.609904  | -1.021662 | 2.110319  | 28 | 1 | 0 | 4.581653  | -2.250953 | 0.693839  | 28 | 1 | 0 | 4.473750  | -2.167390 | 1.116528  |
| 29 | 6 | 0 | 5.343955  | 0.026466  | -0.267825 | 29 | 6 | 0 | 5.355928  | 0.189430  | -0.199378 | 29 | 6 | 0 | 5.406744  | 0.085974  | -0.052137 |
| 30 | 7 | 0 | 5.669807  | 0.111321  | -1.556673 | 30 | 7 | 0 | 5.689718  | 1.154336  | -1.047200 | 30 | 7 | 0 | 5.830448  | 0.984149  | -0.944920 |
| 31 | 6 | 0 | 7.133252  | 0.099391  | -1.740978 | 31 | 6 | 0 | 7.156138  | 1.284708  | -1.159118 | 31 | 6 | 0 | 7.301358  | 0.987791  | -1.044224 |
| 32 | 6 | 0 | 7.634607  | 0.381891  | -0.308840 | 32 | 6 | 0 | 7.644836  | 0.441226  | 0.039544  | 32 | 6 | 0 | 7.704502  | 0.234237  | 0.239109  |
| 33 | 7 | 0 | 6.433735  | 0.087730  | 0.496540  | 33 | 7 | 0 | 6.428701  | -0.315959 | 0.397312  | 33 | 7 | 0 | 6.446301  | -0.447594 | 0.595608  |
| 34 | 1 | 0 | 6.386301  | 0.299163  | 1.487520  | 34 | 1 | 0 | 6.376043  | -0.894584 | 1.229230  | 34 | 1 | 0 | 6.336086  | -0.929817 | 1.480491  |
| 35 | 1 | 0 | 8.466608  | -0.259809 | -0.014255 | 35 | 1 | 0 | 8.458024  | -0.238342 | -0.219766 | 35 | 1 | 0 | 8.506184  | -0.487901 | 0.075447  |
| 36 | 1 | 0 | 7.446435  | -0.885827 | -2.102046 | 36 | 1 | 0 | 7.482685  | 0.872052  | -2.118602 | 36 | 1 | 0 | 7.607878  | 0.453179  | -1.949904 |
| 37 | 1 | 0 | 5.031153  | -0.165031 | -2.294573 | 37 | 1 | 0 | 5.055533  | 1.508984  | -1.755400 | 37 | 1 | 0 | 5.243909  | 1.301973  | -1.708472 |
| 38 | 1 | 0 | 7.917645  | 1.430501  | -0.169872 | 38 | 1 | 0 | 7.945770  | 1.061596  | 0.889445  | 38 | 1 | 0 | 7.991074  | 0.917765  | 1.045584  |
| 39 | 1 | 0 | 7.440916  | 0.862289  | -2.457925 | 39 | 1 | 0 | 7.455516  | 2.331803  | -1.092833 | 39 | 1 | 0 | 7.687255  | 2.007991  | -1.078374 |
| 40 | 1 | 0 | -0.443591 | -0.690355 | 2.257241  | 40 | 1 | 0 | -0.433285 | -2.115208 | 1.086063  | 40 | 1 | 0 | -0.556449 | -1.734383 | 1.091510  |

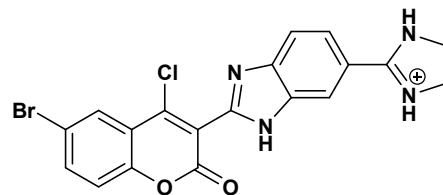

9

| Initial molecule <b>9<sup>+</sup></b><br>$E_{EL} = -4133.19239989$ a.u. |    |   |           |           |           | Radical dication <b>9<sup>2+</sup></b> with 1 e <sup>-</sup> less<br>$E_{EL} = -4132.96152522$ a.u. |    |   |           |           |           | Radical <b>9<sup>•</sup></b> with 1 e <sup>-</sup> more<br>$E_{EL} = -4133.31649939$ a.u. |    |   |           |           |           |
|-------------------------------------------------------------------------|----|---|-----------|-----------|-----------|-----------------------------------------------------------------------------------------------------|----|---|-----------|-----------|-----------|-------------------------------------------------------------------------------------------|----|---|-----------|-----------|-----------|
| Cartesian Coordinates                                                   |    |   |           |           |           | Cartesian Coordinates                                                                               |    |   |           |           |           | Cartesian Coordinates                                                                     |    |   |           |           |           |
| 1                                                                       | 6  | 0 | 4.516689  | 2.233430  | -0.303955 | 1                                                                                                   | 6  | 0 | 4.454576  | 2.283952  | -0.177301 | 1                                                                                         | 6  | 0 | 4.444775  | 2.275372  | -0.260273 |
| 2                                                                       | 1  | 0 | 4.608747  | 3.300690  | -0.478867 | 2                                                                                                   | 1  | 0 | 4.523157  | 3.363533  | -0.259982 | 2                                                                                         | 1  | 0 | 4.485848  | 3.355809  | -0.366297 |
| 3                                                                       | 6  | 0 | 5.637575  | 1.431214  | -0.136174 | 3                                                                                                   | 6  | 0 | 5.589127  | 1.488087  | -0.148424 | 3                                                                                         | 6  | 0 | 5.618769  | 1.509153  | -0.273466 |
| 4                                                                       | 6  | 0 | 5.473900  | 0.056899  | 0.090744  | 4                                                                                                   | 6  | 0 | 5.463625  | 0.087289  | -0.035768 | 4                                                                                         | 6  | 0 | 5.502679  | 0.126665  | -0.112425 |
| 5                                                                       | 6  | 0 | 4.220500  | -0.527392 | 0.151326  | 5                                                                                                   | 6  | 0 | 4.230963  | -0.521735 | 0.042313  | 5                                                                                         | 6  | 0 | 4.280363  | -0.509046 | 0.051112  |
| 6                                                                       | 6  | 0 | 3.072851  | 0.275396  | -0.019214 | 6                                                                                                   | 6  | 0 | 3.054964  | 0.273442  | 0.011229  | 6                                                                                         | 6  | 0 | 3.078582  | 0.252137  | 0.054074  |
| 7                                                                       | 6  | 0 | 3.251898  | 1.651717  | -0.241633 | 7                                                                                                   | 6  | 0 | 3.204818  | 1.676349  | -0.095981 | 7                                                                                         | 6  | 0 | 3.217259  | 1.655712  | -0.095647 |
| 8                                                                       | 1  | 0 | 6.627094  | 1.873914  | -0.181628 | 8                                                                                                   | 1  | 0 | 6.568510  | 1.951002  | -0.211064 | 8                                                                                         | 1  | 0 | 6.584062  | 1.987110  | -0.399098 |
| 9                                                                       | 35 | 0 | 7.023514  | -1.035063 | 0.320461  | 9                                                                                                   | 35 | 0 | 7.042431  | -0.973555 | 0.005361  | 9                                                                                         | 35 | 0 | 7.098588  | -0.940039 | -0.120308 |
| 10                                                                      | 1  | 0 | 4.116459  | -1.591295 | 0.323631  | 10                                                                                                  | 1  | 0 | 4.152630  | -1.597936 | 0.124014  | 10                                                                                        | 1  | 0 | 4.233646  | -1.584038 | 0.170671  |
| 11                                                                      | 6  | 0 | 1.712234  | -0.215310 | 0.011560  | 11                                                                                                  | 6  | 0 | 1.728210  | -0.255833 | 0.069513  | 11                                                                                        | 6  | 0 | 1.765400  | -0.270591 | 0.196564  |
| 12                                                                      | 8  | 0 | 2.181423  | 2.487174  | -0.395407 | 12                                                                                                  | 8  | 0 | 2.126764  | 2.500168  | -0.112824 | 12                                                                                        | 8  | 0 | 2.108688  | 2.474638  | -0.047147 |
| 13                                                                      | 6  | 0 | 0.885239  | 2.056255  | -0.357294 | 13                                                                                                  | 6  | 0 | 0.843228  | 2.055337  | -0.037887 | 13                                                                                        | 6  | 0 | 0.815702  | 1.990444  | 0.055724  |
| 14                                                                      | 6  | 0 | 0.639628  | 0.618536  | -0.189721 | 14                                                                                                  | 6  | 0 | 0.604851  | 0.591654  | 0.023674  | 14                                                                                        | 6  | 0 | 0.601274  | 0.573550  | 0.128260  |
| 15                                                                      | 8  | 0 | 0.018463  | 2.911337  | -0.464457 | 15                                                                                                  | 8  | 0 | -0.023027 | 2.912037  | -0.031481 | 15                                                                                        | 8  | 0 | -0.045524 | 2.888438  | 0.065126  |
| 16                                                                      | 6  | 0 | -0.762746 | 0.178608  | -0.251966 | 16                                                                                                  | 6  | 0 | -0.762727 | 0.157561  | 0.028409  | 16                                                                                        | 6  | 0 | -0.767485 | 0.108941  | 0.089309  |
| 17                                                                      | 17 | 0 | 1.491931  | -1.904771 | 0.355218  | 17                                                                                                  | 17 | 0 | 1.584608  | -1.964440 | 0.208238  | 17                                                                                        | 17 | 0 | 1.639716  | -1.977239 | 0.591316  |
| 18                                                                      | 7  | 0 | -1.787589 | 0.920848  | 0.277128  | 18                                                                                                  | 7  | 0 | -1.829226 | 1.020505  | 0.040660  | 18                                                                                        | 7  | 0 | -1.843538 | 0.975403  | 0.183656  |
| 19                                                                      | 6  | 0 | -2.957312 | 0.240625  | 0.031224  | 19                                                                                                  | 6  | 0 | -2.970721 | 0.277573  | 0.029229  | 19                                                                                        | 6  | 0 | -2.999638 | 0.238946  | 0.080886  |
| 20                                                                      | 6  | 0 | -2.557187 | -0.927206 | -0.669369 | 20                                                                                                  | 6  | 0 | -2.517270 | -1.093927 | -0.000473 | 20                                                                                        | 6  | 0 | -2.553968 | -1.105941 | -0.070055 |
| 21                                                                      | 7  | 0 | -1.189626 | -0.938186 | -0.828620 | 21                                                                                                  | 7  | 0 | -1.183808 | -1.145208 | 0.002297  | 21                                                                                        | 7  | 0 | -1.188500 | -1.162795 | -0.062797 |
| 22                                                                      | 1  | 0 | -1.693925 | 1.836960  | 0.702067  | 22                                                                                                  | 1  | 0 | -1.740970 | 2.035581  | 0.054806  | 22                                                                                        | 1  | 0 | -1.732391 | 1.983250  | 0.248275  |
| 23                                                                      | 6  | 0 | -3.523220 | -1.855202 | -1.092123 | 23                                                                                                  | 6  | 0 | -3.465755 | -2.157945 | -0.030894 | 23                                                                                        | 6  | 0 | -3.503526 | -2.136181 | -0.208386 |
| 24                                                                      | 6  | 0 | -4.286624 | 0.520589  | 0.332562  | 24                                                                                                  | 6  | 0 | -4.315263 | 0.623282  | 0.034190  | 24                                                                                        | 6  | 0 | -4.339193 | 0.591749  | 0.089489  |
| 25                                                                      | 6  | 0 | -4.853023 | -1.587918 | -0.806030 | 25                                                                                                  | 6  | 0 | -4.793975 | -1.820964 | -0.032701 | 25                                                                                        | 6  | 0 | -4.849752 | -1.799055 | -0.204238 |

|    |   |   |           |           |           |    |   |   |           |           |           |    |   |   |           |           |           |
|----|---|---|-----------|-----------|-----------|----|---|---|-----------|-----------|-----------|----|---|---|-----------|-----------|-----------|
| 26 | 6 | 0 | -5.238812 | -0.415116 | -0.098664 | 26 | 6 | 0 | -5.219354 | -0.445000 | 0.002525  | 26 | 6 | 0 | -5.281309 | -0.452242 | -0.058384 |
| 27 | 1 | 0 | -3.235366 | -2.757922 | -1.623165 | 27 | 1 | 0 | -3.135330 | -3.191197 | -0.046798 | 27 | 1 | 0 | -3.189568 | -3.171297 | -0.312140 |
| 28 | 1 | 0 | -4.565725 | 1.432115  | 0.852153  | 28 | 1 | 0 | -4.638903 | 1.658664  | 0.034157  | 28 | 1 | 0 | -4.643231 | 1.630676  | 0.173387  |
| 29 | 1 | 0 | -5.608802 | -2.306396 | -1.107946 | 29 | 1 | 0 | -5.543816 | -2.605502 | -0.035841 | 29 | 1 | 0 | -5.586014 | -2.593094 | -0.289198 |
| 30 | 6 | 0 | -6.654858 | -0.175183 | 0.183824  | 30 | 6 | 0 | -6.662560 | -0.148784 | -0.004214 | 30 | 6 | 0 | -6.699770 | -0.143241 | -0.064820 |
| 31 | 7 | 0 | -7.111060 | 0.613578  | 1.156676  | 31 | 7 | 0 | -7.203814 | 0.944823  | 0.516400  | 31 | 7 | 0 | -7.236132 | 1.007823  | 0.361705  |
| 32 | 6 | 0 | -8.579727 | 0.529542  | 1.269742  | 32 | 6 | 0 | -8.678350 | 0.888854  | 0.455149  | 32 | 6 | 0 | -8.708458 | 0.936560  | 0.373613  |
| 33 | 6 | 0 | -8.961603 | -0.154555 | -0.059627 | 33 | 6 | 0 | -8.914932 | -0.296840 | -0.508130 | 33 | 6 | 0 | -8.969221 | -0.277676 | -0.537150 |
| 34 | 7 | 0 | -7.667103 | -0.710700 | -0.496496 | 34 | 7 | 0 | -7.584846 | -0.937726 | -0.537897 | 34 | 7 | 0 | -7.664641 | -0.963306 | -0.502176 |
| 35 | 1 | 0 | -7.544560 | -1.133521 | -1.409897 | 35 | 1 | 0 | -7.361024 | -1.711400 | -1.155775 | 35 | 1 | 0 | -7.463469 | -1.738738 | -1.123288 |
| 36 | 1 | 0 | -9.701697 | -0.946802 | 0.064967  | 36 | 1 | 0 | -9.668650 | -0.997685 | -0.145900 | 36 | 1 | 0 | -9.762749 | -0.927627 | -0.164362 |
| 37 | 1 | 0 | -8.843381 | -0.080610 | 2.139934  | 37 | 1 | 0 | -9.073485 | 0.697573  | 1.457473  | 37 | 1 | 0 | -9.059974 | 0.765765  | 1.397304  |
| 38 | 1 | 0 | -6.531226 | 0.899094  | 1.938037  | 38 | 1 | 0 | -6.704378 | 1.556573  | 1.154207  | 38 | 1 | 0 | -6.735956 | 1.629505  | 0.987248  |
| 39 | 1 | 0 | -9.319430 | 0.562570  | -0.805701 | 39 | 1 | 0 | -9.178166 | 0.032115  | -1.518103 | 39 | 1 | 0 | -9.198943 | 0.021964  | -1.565832 |
| 40 | 1 | 0 | -9.017836 | 1.523077  | 1.378369  | 40 | 1 | 0 | -9.081768 | 1.830048  | 0.078589  | 40 | 1 | 0 | -9.147538 | 1.859112  | -0.009927 |



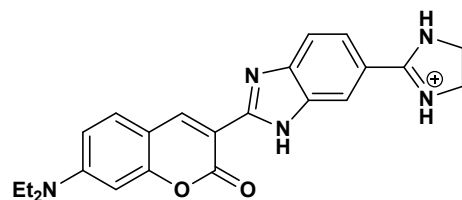

13

| Initial molecule <b>13<sup>+</sup></b><br>$E_{EL} = -1236.46805587$ a.u. |   |   |           |           |           | Radical dication <b>13<sup>2+</sup></b> with 1 e <sup>-</sup> less<br>$E_{EL} = -1236.27314012$ a.u. |   |   |           |           |           | Radical <b>13<sup>•</sup></b> with 1 e <sup>-</sup> more<br>$E_{EL} = -1236.57090231$ a.u. |   |   |           |           |           |
|--------------------------------------------------------------------------|---|---|-----------|-----------|-----------|------------------------------------------------------------------------------------------------------|---|---|-----------|-----------|-----------|--------------------------------------------------------------------------------------------|---|---|-----------|-----------|-----------|
| Cartesian Coordinates                                                    |   |   |           |           |           | Cartesian Coordinates                                                                                |   |   |           |           |           | Cartesian Coordinates                                                                      |   |   |           |           |           |
| 1                                                                        | 6 | 0 | 5.141020  | -0.906029 | 0.038307  | 1                                                                                                    | 6 | 0 | 5.131591  | -0.912142 | 0.045127  | 1                                                                                          | 6 | 0 | 5.139012  | -0.883358 | -0.041458 |
| 2                                                                        | 1 | 0 | 5.399909  | -1.956490 | 0.080558  | 2                                                                                                    | 1 | 0 | 5.408314  | -1.957576 | 0.087916  | 2                                                                                          | 1 | 0 | 5.364912  | -1.942668 | -0.010310 |
| 3                                                                        | 6 | 0 | 6.134030  | 0.111404  | 0.005013  | 3                                                                                                    | 6 | 0 | 6.110203  | 0.129706  | 0.005761  | 3                                                                                          | 6 | 0 | 6.162466  | 0.097883  | -0.087295 |
| 4                                                                        | 6 | 0 | 5.697904  | 1.478991  | -0.051965 | 4                                                                                                    | 6 | 0 | 5.669759  | 1.500883  | -0.054666 | 4                                                                                          | 6 | 0 | 5.753066  | 1.458498  | -0.100670 |
| 5                                                                        | 6 | 0 | 4.360293  | 1.796305  | -0.069940 | 5                                                                                                    | 6 | 0 | 4.334163  | 1.798662  | -0.072119 | 5                                                                                          | 6 | 0 | 4.409969  | 1.811594  | -0.097819 |
| 6                                                                        | 6 | 0 | 3.359732  | 0.789898  | -0.033598 | 6                                                                                                    | 6 | 0 | 3.349471  | 0.770284  | -0.032431 | 6                                                                                          | 6 | 0 | 3.372043  | 0.843113  | -0.070027 |
| 7                                                                        | 6 | 0 | 3.806975  | -0.551312 | 0.019664  | 7                                                                                                    | 6 | 0 | 3.801191  | -0.575210 | 0.025395  | 7                                                                                          | 6 | 0 | 3.807159  | -0.503754 | -0.040445 |
| 8                                                                        | 7 | 0 | 7.456975  | -0.200720 | 0.027488  | 8                                                                                                    | 7 | 0 | 7.425903  | -0.169974 | 0.025554  | 8                                                                                          | 7 | 0 | 7.511479  | -0.264104 | -0.148294 |
| 9                                                                        | 1 | 0 | 6.426764  | 2.279287  | -0.081813 | 9                                                                                                    | 1 | 0 | 6.392081  | 2.306000  | -0.083643 | 9                                                                                          | 1 | 0 | 6.490572  | 2.252467  | -0.119041 |
| 10                                                                       | 1 | 0 | 4.051248  | 2.837715  | -0.112865 | 10                                                                                                   | 1 | 0 | 4.004741  | 2.832372  | -0.115806 | 10                                                                                         | 1 | 0 | 4.138543  | 2.865297  | -0.110500 |
| 11                                                                       | 6 | 0 | 1.972822  | 1.033393  | -0.046441 | 11                                                                                                   | 6 | 0 | 1.960622  | 1.018767  | -0.047626 | 11                                                                                         | 6 | 0 | 1.984326  | 1.116002  | -0.061903 |
| 12                                                                       | 8 | 0 | 2.884758  | -1.571256 | 0.057205  | 12                                                                                                   | 8 | 0 | 2.893326  | -1.601564 | 0.064680  | 12                                                                                         | 8 | 0 | 2.872099  | -1.532608 | 0.002102  |
| 13                                                                       | 6 | 0 | 1.523145  | -1.365882 | 0.047598  | 13                                                                                                   | 6 | 0 | 1.538013  | -1.405109 | 0.053463  | 13                                                                                         | 6 | 0 | 1.501728  | -1.305106 | 0.007115  |
| 14                                                                       | 6 | 0 | 1.051352  | 0.001450  | -0.007875 | 14                                                                                                   | 6 | 0 | 1.052073  | -0.019609 | -0.008521 | 14                                                                                         | 6 | 0 | 1.036898  | 0.044301  | -0.026342 |
| 15                                                                       | 8 | 0 | 0.828011  | -2.383291 | 0.087726  | 15                                                                                                   | 8 | 0 | 0.836529  | -2.403763 | 0.096369  | 15                                                                                         | 8 | 0 | 0.815335  | -2.345791 | 0.041605  |
| 16                                                                       | 6 | 0 | -0.379243 | 0.276793  | -0.020700 | 16                                                                                                   | 6 | 0 | -0.374618 | 0.242673  | -0.023315 | 16                                                                                         | 6 | 0 | -0.371783 | 0.295027  | -0.024311 |
| 17                                                                       | 1 | 0 | 1.617028  | 2.059241  | -0.087257 | 17                                                                                                   | 1 | 0 | 1.604137  | 2.043127  | -0.091343 | 17                                                                                         | 1 | 0 | 1.632022  | 2.141625  | -0.083374 |
| 18                                                                       | 7 | 0 | -1.334814 | -0.705903 | 0.016074  | 18                                                                                                   | 7 | 0 | -1.336512 | -0.734427 | 0.007638  | 18                                                                                         | 7 | 0 | -1.339119 | -0.694556 | 0.009444  |
| 19                                                                       | 6 | 0 | -2.567078 | -0.089594 | -0.012683 | 19                                                                                                   | 6 | 0 | -2.557055 | -0.108293 | -0.019698 | 19                                                                                         | 6 | 0 | -2.575869 | -0.087750 | -0.005745 |
| 20                                                                       | 6 | 0 | -2.273182 | 1.300906  | -0.064072 | 20                                                                                                   | 6 | 0 | -2.254307 | 1.282913  | -0.065154 | 20                                                                                         | 6 | 0 | -2.286270 | 1.311161  | -0.044677 |
| 21                                                                       | 7 | 0 | -0.912962 | 1.499376  | -0.069062 | 21                                                                                                   | 7 | 0 | -0.898974 | 1.471165  | -0.068049 | 21                                                                                         | 7 | 0 | -0.939060 | 1.523896  | -0.055743 |
| 22                                                                       | 1 | 0 | -1.121216 | -1.698844 | 0.054717  | 22                                                                                                   | 1 | 0 | -1.141241 | -1.731404 | 0.045326  | 22                                                                                         | 1 | 0 | -1.113489 | -1.684013 | 0.034260  |
| 23                                                                       | 6 | 0 | -3.324105 | 2.232394  | -0.097661 | 23                                                                                                   | 6 | 0 | -3.298691 | 2.226503  | -0.095111 | 23                                                                                         | 6 | 0 | -3.352938 | 2.232651  | -0.063563 |
| 24                                                                       | 6 | 0 | -3.863806 | -0.585004 | 0.008130  | 24                                                                                                   | 6 | 0 | -3.861701 | -0.595286 | -0.001557 | 24                                                                                         | 6 | 0 | -3.865166 | -0.588227 | 0.016204  |
| 25                                                                       | 6 | 0 | -4.626021 | 1.753695  | -0.072796 | 25                                                                                                   | 6 | 0 | -4.599150 | 1.755773  | -0.072236 | 25                                                                                         | 6 | 0 | -4.651526 | 1.745465  | -0.038622 |

|    |   |   |           |           |           |    |   |   |           |           |           |    |   |   |           |           |           |
|----|---|---|-----------|-----------|-----------|----|---|---|-----------|-----------|-----------|----|---|---|-----------|-----------|-----------|
| 26 | 6 | 0 | -4.905160 | 0.360891  | -0.019746 | 26 | 6 | 0 | -4.886090 | 0.359838  | -0.025192 | 26 | 6 | 0 | -4.930515 | 0.351232  | 0.000799  |
| 27 | 1 | 0 | -3.122418 | 3.298669  | -0.147681 | 27 | 1 | 0 | -3.086880 | 3.290643  | -0.139782 | 27 | 1 | 0 | -3.161177 | 3.301561  | -0.104645 |
| 28 | 1 | 0 | -4.056208 | -1.651837 | 0.071804  | 28 | 1 | 0 | -4.064181 | -1.660279 | 0.056010  | 28 | 1 | 0 | -4.045073 | -1.657668 | 0.072022  |
| 29 | 1 | 0 | -5.445439 | 2.464355  | -0.120823 | 29 | 1 | 0 | -5.416844 | 2.468227  | -0.115466 | 29 | 1 | 0 | -5.470975 | 2.457542  | -0.076906 |
| 30 | 6 | 0 | -6.291480 | -0.097354 | 0.005565  | 30 | 6 | 0 | -6.281861 | -0.085951 | 0.002658  | 30 | 6 | 0 | -6.299756 | -0.111187 | 0.019444  |
| 31 | 7 | 0 | -6.691712 | -1.326381 | -0.325713 | 31 | 7 | 0 | -6.698507 | -1.292761 | -0.375776 | 31 | 7 | 0 | -6.686684 | -1.380413 | -0.196413 |
| 32 | 6 | 0 | -8.162825 | -1.425922 | -0.342169 | 32 | 6 | 0 | -8.171141 | -1.381145 | -0.360937 | 32 | 6 | 0 | -8.153862 | -1.477251 | -0.290553 |
| 33 | 6 | 0 | -8.573997 | -0.150595 | 0.422452  | 33 | 6 | 0 | -8.556911 | -0.125118 | 0.450075  | 33 | 6 | 0 | -8.593119 | -0.168696 | 0.388445  |
| 34 | 7 | 0 | -7.337412 | 0.650931  | 0.361614  | 34 | 7 | 0 | -7.307475 | 0.658584  | 0.410201  | 34 | 7 | 0 | -7.379000 | 0.655944  | 0.256168  |
| 35 | 1 | 0 | -7.232281 | 1.511225  | 0.887915  | 35 | 1 | 0 | -7.183452 | 1.504412  | 0.956096  | 35 | 1 | 0 | -7.300500 | 1.539916  | 0.745353  |
| 36 | 1 | 0 | -9.403978 | 0.379251  | -0.047939 | 36 | 1 | 0 | -9.379480 | 0.435303  | 0.002762  | 36 | 1 | 0 | -9.443658 | 0.303827  | -0.106030 |
| 37 | 1 | 0 | -8.517684 | -1.418714 | -1.378128 | 37 | 1 | 0 | -8.547823 | -1.342698 | -1.388143 | 37 | 1 | 0 | -8.456064 | -1.513706 | -1.343664 |
| 38 | 1 | 0 | -6.106838 | -1.957275 | -0.862486 | 38 | 1 | 0 | -6.127201 | -1.910611 | -0.942148 | 38 | 1 | 0 | -6.091639 | -2.036043 | -0.690022 |
| 39 | 1 | 0 | -8.822434 | -0.358538 | 1.468609  | 39 | 1 | 0 | -8.802717 | -0.363193 | 1.490051  | 39 | 1 | 0 | -8.826569 | -0.316447 | 1.449383  |
| 40 | 1 | 0 | -8.496194 | -2.342190 | 0.148103  | 40 | 1 | 0 | -8.498705 | -2.309183 | 0.110593  | 40 | 1 | 0 | -8.521627 | -2.368124 | 0.221694  |
| 41 | 6 | 0 | 8.473837  | 0.850972  | -0.004720 | 41 | 6 | 0 | 8.446066  | 0.887101  | -0.035619 | 41 | 6 | 0 | 8.510655  | 0.746245  | 0.191022  |
| 42 | 6 | 0 | 7.881882  | -1.598719 | 0.075566  | 42 | 6 | 0 | 7.881540  | -1.564979 | 0.103105  | 42 | 6 | 0 | 7.873793  | -1.633303 | 0.207431  |
| 43 | 1 | 0 | 9.460314  | 0.388983  | 0.038624  | 43 | 1 | 0 | 9.431220  | 0.425833  | -0.030166 | 43 | 1 | 0 | 9.504795  | 0.309966  | 0.070914  |
| 44 | 1 | 0 | 8.410901  | 1.441488  | -0.927500 | 44 | 1 | 0 | 8.327904  | 1.472131  | -0.952941 | 44 | 1 | 0 | 8.446269  | 1.605784  | -0.482813 |
| 45 | 1 | 0 | 8.374652  | 1.528748  | 0.852154  | 45 | 1 | 0 | 8.354099  | 1.549813  | 0.830883  | 45 | 1 | 0 | 8.411413  | 1.108722  | 1.228490  |
| 46 | 1 | 0 | 8.971008  | -1.639110 | 0.085051  | 46 | 1 | 0 | 8.968153  | -1.578931 | 0.146445  | 46 | 1 | 0 | 8.950793  | -1.757819 | 0.073786  |
| 47 | 1 | 0 | 7.509928  | -2.096874 | 0.980064  | 47 | 1 | 0 | 7.479866  | -2.043299 | 1.001588  | 47 | 1 | 0 | 7.620428  | -1.881780 | 1.252438  |
| 48 | 1 | 0 | 7.523689  | -2.153921 | -0.800955 | 48 | 1 | 0 | 7.549133  | -2.117730 | -0.782022 | 48 | 1 | 0 | 7.376362  | -2.353877 | -0.449006 |

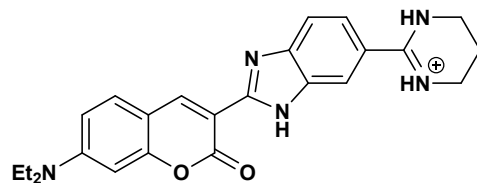

14

| Initial molecule <b>14<sup>+</sup></b><br>$E_{EL} = -1275.79265411$ a.u. |   |   |           |           |           | qRadical dication <b>14<sup>*2+</sup></b> with 1 e <sup>-</sup> less<br>$E_{EL} = -1275.59845285$ a.u. |   |   |           |           |           | Radical <b>14<sup>*</sup></b> with 1 e <sup>-</sup> more<br>$E_{EL} = -1275.89388715$ a.u. |   |   |           |           |           |
|--------------------------------------------------------------------------|---|---|-----------|-----------|-----------|--------------------------------------------------------------------------------------------------------|---|---|-----------|-----------|-----------|--------------------------------------------------------------------------------------------|---|---|-----------|-----------|-----------|
| Cartesian Coordinates                                                    |   |   |           |           |           | Cartesian Coordinates                                                                                  |   |   |           |           |           | Cartesian Coordinates                                                                      |   |   |           |           |           |
| 1                                                                        | 6 | 0 | 5.458909  | -0.938603 | 0.076883  | 1                                                                                                      | 6 | 0 | 5.447020  | -0.944627 | 0.078998  | 1                                                                                          | 6 | 0 | 5.457314  | -0.916775 | -0.011390 |
| 2                                                                        | 1 | 0 | 5.699234  | -1.991922 | 0.148359  | 2                                                                                                      | 1 | 0 | 5.705584  | -1.993329 | 0.148794  | 2                                                                                          | 1 | 0 | 5.663744  | -1.979252 | 0.041777  |
| 3                                                                        | 6 | 0 | 6.469499  | 0.059967  | 0.022589  | 3                                                                                                      | 6 | 0 | 6.443878  | 0.079315  | 0.030161  | 3                                                                                          | 6 | 0 | 6.499645  | 0.043779  | -0.078764 |
| 4                                                                        | 6 | 0 | 6.057692  | 1.432689  | -0.073946 | 4                                                                                                      | 6 | 0 | 6.027560  | 1.456582  | -0.061617 | 4                                                                                          | 6 | 0 | 6.115476  | 1.409820  | -0.122436 |
| 5                                                                        | 6 | 0 | 4.725674  | 1.772800  | -0.107305 | 5                                                                                                      | 6 | 0 | 4.697653  | 1.776780  | -0.098657 | 5                                                                                          | 6 | 0 | 4.777919  | 1.787568  | -0.127308 |
| 6                                                                        | 6 | 0 | 3.707670  | 0.785397  | -0.049405 | 6                                                                                                      | 6 | 0 | 3.694512  | 0.766409  | -0.046593 | 6                                                                                          | 6 | 0 | 3.721433  | 0.840229  | -0.077503 |
| 7                                                                        | 6 | 0 | 4.131218  | -0.561205 | 0.040539  | 7                                                                                                      | 6 | 0 | 4.123218  | -0.585302 | 0.041396  | 7                                                                                          | 6 | 0 | 4.132238  | -0.514350 | -0.018120 |
| 8                                                                        | 7 | 0 | 7.786960  | -0.274294 | 0.061979  | 8                                                                                                      | 7 | 0 | 7.753332  | -0.242946 | 0.070981  | 8                                                                                          | 7 | 0 | 7.843379  | -0.346772 | -0.133630 |
| 9                                                                        | 1 | 0 | 6.801081  | 2.218708  | -0.122105 | 9                                                                                                      | 1 | 0 | 6.765309  | 2.247187  | -0.105053 | 9                                                                                          | 1 | 0 | 6.866900  | 2.190057  | -0.158214 |
| 10                                                                       | 1 | 0 | 4.435418  | 2.818017  | -0.179694 | 10                                                                                                     | 1 | 0 | 4.386426  | 2.814734  | -0.168905 | 10                                                                                         | 1 | 0 | 4.526600  | 2.845823  | -0.163233 |
| 11                                                                       | 6 | 0 | 2.324571  | 1.052185  | -0.075307 | 11                                                                                                     | 6 | 0 | 2.311112  | 1.037702  | -0.078956 | 11                                                                                         | 6 | 0 | 2.338731  | 1.138245  | -0.076241 |
| 12                                                                       | 8 | 0 | 3.191174  | -1.563632 | 0.097590  | 12                                                                                                     | 8 | 0 | 3.197625  | -1.595031 | 0.095463  | 12                                                                                         | 8 | 0 | 3.180077  | -1.526687 | 0.047843  |
| 13                                                                       | 6 | 0 | 1.833302  | -1.335326 | 0.073433  | 13                                                                                                     | 6 | 0 | 1.846054  | -1.376214 | 0.070363  | 13                                                                                         | 6 | 0 | 1.809639  | -1.272305 | 0.043791  |
| 14                                                                       | 6 | 0 | 1.385117  | 0.038268  | -0.016016 | 14                                                                                                     | 6 | 0 | 1.383699  | 0.015608  | -0.025256 | 14                                                                                         | 6 | 0 | 1.372824  | 0.079130  | -0.019356 |
| 15                                                                       | 8 | 0 | 1.121286  | -2.340267 | 0.131719  | 15                                                                                                     | 8 | 0 | 1.128157  | -2.362381 | 0.130190  | 15                                                                                         | 8 | 0 | 1.107234  | -2.305498 | 0.098562  |
| 16                                                                       | 6 | 0 | -0.041762 | 0.337411  | -0.043540 | 16                                                                                                     | 6 | 0 | -0.037560 | 0.300059  | -0.059447 | 16                                                                                         | 6 | 0 | -0.033658 | 0.359463  | -0.030767 |
| 17                                                                       | 1 | 0 | 1.987147  | 2.082825  | -0.143674 | 17                                                                                                     | 1 | 0 | 1.972160  | 2.066720  | -0.147342 | 17                                                                                         | 1 | 0 | 2.002732  | 2.168494  | -0.120772 |
| 18                                                                       | 7 | 0 | -1.012598 | -0.631697 | -0.004914 | 18                                                                                                     | 7 | 0 | -1.015111 | -0.662482 | -0.016121 | 18                                                                                         | 7 | 0 | -1.014496 | -0.615760 | 0.016412  |
| 19                                                                       | 6 | 0 | -2.234950 | 0.001478  | -0.053046 | 19                                                                                                     | 6 | 0 | -2.225266 | -0.019965 | -0.068453 | 19                                                                                         | 6 | 0 | -2.241528 | 0.007473  | -0.026794 |
| 20                                                                       | 6 | 0 | -1.922238 | 1.386019  | -0.115425 | 20                                                                                                     | 6 | 0 | -1.902818 | 1.365209  | -0.141107 | 20                                                                                         | 6 | 0 | -1.935304 | 1.399189  | -0.091257 |
| 21                                                                       | 7 | 0 | -0.556449 | 1.565396  | -0.110435 | 21                                                                                                     | 7 | 0 | -0.543798 | 1.534236  | -0.136494 | 21                                                                                         | 7 | 0 | -0.578445 | 1.593085  | -0.093316 |
| 22                                                                       | 1 | 0 | -0.814002 | -1.626836 | 0.050160  | 22                                                                                                     | 1 | 0 | -0.835283 | -1.660944 | 0.047445  | 22                                                                                         | 1 | 0 | -0.799912 | -1.607382 | 0.061653  |
| 23                                                                       | 6 | 0 | -2.960183 | 2.329647  | -0.165017 | 23                                                                                                     | 6 | 0 | -2.934212 | 2.321426  | -0.198022 | 23                                                                                         | 6 | 0 | -2.987276 | 2.330365  | -0.139900 |
| 24                                                                       | 6 | 0 | -3.540533 | -0.477267 | -0.039927 | 24                                                                                                     | 6 | 0 | -3.538482 | -0.488746 | -0.049566 | 24                                                                                         | 6 | 0 | -3.540618 | -0.477435 | -0.009165 |
| 25                                                                       | 6 | 0 | -4.270544 | 1.867484  | -0.145174 | 25                                                                                                     | 6 | 0 | -4.242416 | 1.868345  | -0.171299 | 25                                                                                         | 6 | 0 | -4.296498 | 1.858113  | -0.119747 |
| 26                                                                       | 6 | 0 | -4.566905 | 0.480160  | -0.084941 | 26                                                                                                     | 6 | 0 | -4.547356 | 0.478205  | -0.097667 | 26                                                                                         | 6 | 0 | -4.587072 | 0.472064  | -0.056190 |

|    |   |   |           |           |           |    |   |   |           |           |           |    |   |   |           |           |           |
|----|---|---|-----------|-----------|-----------|----|---|---|-----------|-----------|-----------|----|---|---|-----------|-----------|-----------|
| 27 | 1 | 0 | -2.745115 | 3.392941  | -0.225273 | 27 | 1 | 0 | -2.708115 | 3.381477  | -0.266649 | 27 | 1 | 0 | -2.783485 | 3.396005  | -0.205081 |
| 28 | 1 | 0 | -3.749688 | -1.540654 | 0.033064  | 28 | 1 | 0 | -3.759579 | -1.548884 | 0.029051  | 28 | 1 | 0 | -3.738516 | -1.542454 | 0.073890  |
| 29 | 1 | 0 | -5.082822 | 2.586034  | -0.207132 | 29 | 1 | 0 | -5.053389 | 2.588027  | -0.233737 | 29 | 1 | 0 | -5.110812 | 2.573728  | -0.192436 |
| 30 | 6 | 0 | -5.975563 | 0.034618  | -0.068908 | 30 | 6 | 0 | -5.964461 | 0.046652  | -0.065141 | 30 | 6 | 0 | -5.984222 | 0.016770  | -0.055338 |
| 31 | 7 | 0 | -6.327906 | -1.073885 | -0.712469 | 31 | 7 | 0 | -6.342419 | -1.027534 | -0.747369 | 31 | 7 | 0 | -6.309174 | -1.142070 | -0.628988 |
| 32 | 6 | 0 | -7.683097 | -1.647697 | -0.698540 | 32 | 6 | 0 | -7.707007 | -1.580019 | -0.729024 | 32 | 6 | 0 | -7.657384 | -1.729256 | -0.623807 |
| 33 | 6 | 0 | -8.449362 | -1.142205 | 0.519989  | 33 | 6 | 0 | -8.432937 | -1.126815 | 0.534065  | 33 | 6 | 0 | -8.477984 | -1.142707 | 0.520487  |
| 34 | 7 | 0 | -6.890168 | 0.739098  | 0.590720  | 34 | 7 | 0 | -6.848291 | 0.732978  | 0.649552  | 34 | 7 | 0 | -6.936027 | 0.753554  | 0.519280  |
| 35 | 1 | 0 | -6.573026 | 1.515960  | 1.159485  | 35 | 1 | 0 | -6.505965 | 1.488458  | 1.233155  | 35 | 1 | 0 | -6.650336 | 1.559598  | 1.062488  |
| 36 | 1 | 0 | -9.504520 | -1.414779 | 0.424260  | 36 | 1 | 0 | -9.494094 | -1.379812 | 0.453210  | 36 | 1 | 0 | -9.526165 | -1.433701 | 0.402932  |
| 37 | 1 | 0 | -8.192385 | -1.367289 | -1.628016 | 37 | 1 | 0 | -8.232972 | -1.242476 | -1.629570 | 37 | 1 | 0 | -8.134138 | -1.526470 | -1.590443 |
| 38 | 1 | 0 | -5.627951 | -1.523941 | -1.292031 | 38 | 1 | 0 | -5.658698 | -1.466334 | -1.354691 | 38 | 1 | 0 | -5.591519 | -1.616705 | -1.164885 |
| 39 | 1 | 0 | -8.058388 | -1.611761 | 1.430336  | 39 | 1 | 0 | -8.025157 | -1.648247 | 1.408027  | 39 | 1 | 0 | -8.121252 | -1.536565 | 1.479604  |
| 40 | 1 | 0 | -7.579225 | -2.735919 | -0.681078 | 40 | 1 | 0 | -7.620250 | -2.668869 | -0.771283 | 40 | 1 | 0 | -7.546267 | -2.812272 | -0.519981 |
| 41 | 6 | 0 | -8.314628 | 0.374996  | 0.628649  | 41 | 6 | 0 | -8.275455 | 0.380915  | 0.717843  | 41 | 6 | 0 | -8.357315 | 0.379550  | 0.516628  |
| 42 | 1 | 0 | -8.721669 | 0.748622  | 1.570446  | 42 | 1 | 0 | -8.645706 | 0.708564  | 1.691352  | 42 | 1 | 0 | -8.812705 | 0.821031  | 1.405592  |
| 43 | 1 | 0 | -8.835458 | 0.877000  | -0.195579 | 43 | 1 | 0 | -8.815706 | 0.932183  | -0.060920 | 43 | 1 | 0 | -8.843752 | 0.809023  | -0.367994 |
| 44 | 6 | 0 | 8.821532  | 0.758659  | 0.007092  | 44 | 6 | 0 | 8.792347  | 0.796746  | 0.037084  | 44 | 6 | 0 | 8.859934  | 0.655801  | 0.175191  |
| 45 | 6 | 0 | 8.187472  | -1.677066 | 0.155452  | 45 | 6 | 0 | 8.182004  | -1.646597 | 0.146804  | 45 | 6 | 0 | 8.179497  | -1.705872 | 0.282735  |
| 46 | 1 | 0 | 9.799598  | 0.280958  | 0.066602  | 46 | 1 | 0 | 9.767891  | 0.322391  | 0.119655  | 46 | 1 | 0 | 9.846649  | 0.201243  | 0.060610  |
| 47 | 1 | 0 | 8.772475  | 1.325924  | -0.931003 | 47 | 1 | 0 | 8.740604  | 1.350582  | -0.905944 | 47 | 1 | 0 | 8.804895  | 1.498896  | -0.519847 |
| 48 | 1 | 0 | 8.730859  | 1.460389  | 0.845540  | 48 | 1 | 0 | 8.659731  | 1.490959  | 0.872225  | 48 | 1 | 0 | 8.772694  | 1.046323  | 1.203803  |
| 49 | 1 | 0 | 9.275702  | -1.735543 | 0.173286  | 49 | 1 | 0 | 9.268894  | -1.683907 | 0.157529  | 49 | 1 | 0 | 9.254291  | -1.856076 | 0.157583  |
| 50 | 1 | 0 | 7.801731  | -2.141072 | 1.072342  | 50 | 1 | 0 | 7.797110  | -2.108871 | 1.061483  | 50 | 1 | 0 | 7.919921  | -1.903363 | 1.337209  |
| 51 | 1 | 0 | 7.825113  | -2.253257 | -0.705706 | 51 | 1 | 0 | 7.812447  | -2.200090 | -0.722351 | 51 | 1 | 0 | 7.670550  | -2.445905 | -0.342300 |

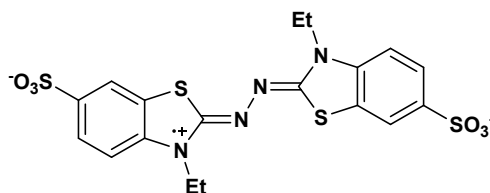

| <b>ABTS<sup>•+</sup></b><br>$E_{EL} = -2880.16908174$ a.u. |    |   |           |           |           | <b>ABTS<sup>••2+</sup> with 1 e<sup>-</sup> less</b><br>$E_{EL} = -2879.96703429$ a.u. |    |   |           |           |           | <b>ABTS<sup>••</sup> with 1 e<sup>-</sup> more</b><br>$E_{EL} = -2880.33842044$ a.u. |    |   |           |           |           |
|------------------------------------------------------------|----|---|-----------|-----------|-----------|----------------------------------------------------------------------------------------|----|---|-----------|-----------|-----------|--------------------------------------------------------------------------------------|----|---|-----------|-----------|-----------|
| <b>Cartesian Coordinates</b>                               |    |   |           |           |           | <b>Cartesian Coordinates</b>                                                           |    |   |           |           |           | <b>Cartesian Coordinates</b>                                                         |    |   |           |           |           |
| 1                                                          | 6  | 0 | -5.326192 | 0.752660  | 0.012284  | 1                                                                                      | 6  | 0 | 5.334174  | -0.770373 | -0.018729 | 1                                                                                    | 6  | 0 | 5.328448  | -0.732493 | -0.017806 |
| 2                                                          | 1  | 0 | -5.494036 | 1.824222  | 0.017189  | 2                                                                                      | 1  | 0 | 5.511688  | -1.840223 | -0.031595 | 2                                                                                    | 1  | 0 | 5.486274  | -1.806202 | -0.011641 |
| 3                                                          | 6  | 0 | -6.396049 | -0.138842 | 0.011807  | 3                                                                                      | 6  | 0 | 6.387804  | 0.132537  | -0.005936 | 3                                                                                    | 6  | 0 | 6.416036  | 0.150564  | -0.012223 |
| 4                                                          | 6  | 0 | -6.194735 | -1.532199 | 0.006578  | 4                                                                                      | 6  | 0 | 6.177744  | 1.533002  | 0.008955  | 4                                                                                    | 6  | 0 | 6.219379  | 1.536758  | -0.023201 |
| 5                                                          | 6  | 0 | -4.911801 | -2.064697 | 0.003773  | 5                                                                                      | 6  | 0 | 4.900627  | 2.061008  | 0.010584  | 5                                                                                    | 6  | 0 | 4.930111  | 2.072980  | -0.045222 |
| 6                                                          | 6  | 0 | -3.828141 | -1.175597 | 0.004763  | 6                                                                                      | 6  | 0 | 3.822394  | 1.158603  | -0.001174 | 6                                                                                    | 6  | 0 | 3.837982  | 1.197964  | -0.052143 |
| 7                                                          | 6  | 0 | -4.039138 | 0.215777  | 0.008820  | 7                                                                                      | 6  | 0 | 4.042392  | -0.239339 | -0.015299 | 7                                                                                    | 6  | 0 | 4.047745  | -0.194604 | -0.039390 |
| 8                                                          | 16 | 0 | -8.093079 | 0.494354  | -0.003985 | 8                                                                                      | 16 | 0 | 8.096200  | -0.482103 | 0.009171  | 8                                                                                    | 16 | 0 | 8.093542  | -0.506849 | 0.093202  |
| 9                                                          | 1  | 0 | -7.047269 | -2.204346 | 0.007498  | 9                                                                                      | 1  | 0 | 7.029935  | 2.205145  | 0.017313  | 9                                                                                    | 1  | 0 | 7.072847  | 2.207564  | -0.021041 |
| 10                                                         | 1  | 0 | -4.757627 | -3.138216 | 0.001549  | 10                                                                                     | 1  | 0 | 4.737376  | 3.132670  | 0.020619  | 10                                                                                   | 1  | 0 | 4.785522  | 3.148290  | -0.058674 |
| 11                                                         | 7  | 0 | -2.478950 | -1.514327 | 0.002346  | 11                                                                                     | 7  | 0 | 2.477531  | 1.477456  | 0.000161  | 11                                                                                   | 7  | 0 | 2.495829  | 1.552896  | -0.074246 |
| 12                                                         | 16 | 0 | -2.510356 | 1.088386  | 0.008943  | 12                                                                                     | 16 | 0 | 2.531277  | -1.112228 | -0.025592 | 12                                                                                   | 16 | 0 | 2.506351  | -1.070984 | -0.056244 |
| 13                                                         | 8  | 0 | -8.661640 | 0.073352  | -1.324117 | 13                                                                                     | 8  | 0 | 8.748690  | 0.176513  | -1.162461 | 13                                                                                   | 8  | 0 | 8.948746  | 0.407239  | -0.729970 |
| 14                                                         | 8  | 0 | -8.774253 | -0.164775 | 1.154581  | 14                                                                                     | 8  | 0 | 8.648808  | -0.027755 | 1.321711  | 14                                                                                   | 8  | 0 | 8.462623  | -0.476065 | 1.548634  |
| 15                                                         | 8  | 0 | -7.981024 | 1.977175  | 0.141975  | 15                                                                                     | 8  | 0 | 7.995630  | -1.964545 | -0.115991 | 15                                                                                   | 8  | 0 | 8.030140  | -1.900534 | -0.451944 |
| 16                                                         | 6  | 0 | -1.645364 | -0.446772 | 0.003003  | 16                                                                                     | 6  | 0 | 1.675926  | 0.401802  | -0.009430 | 16                                                                                   | 6  | 0 | 1.619719  | 0.486696  | -0.073074 |
| 17                                                         | 7  | 0 | -0.324077 | -0.582350 | -0.000429 | 17                                                                                     | 7  | 0 | 0.321983  | 0.550631  | -0.006931 | 17                                                                                   | 7  | 0 | 0.333883  | 0.610414  | -0.082383 |
| 18                                                         | 7  | 0 | 0.324102  | 0.582407  | 0.000841  | 18                                                                                     | 7  | 0 | -0.321989 | -0.550683 | -0.006952 | 18                                                                                   | 7  | 0 | -0.333901 | -0.610423 | -0.082295 |
| 19                                                         | 6  | 0 | 1.645387  | 0.446837  | -0.002650 | 19                                                                                     | 6  | 0 | -1.675926 | -0.401837 | -0.009458 | 19                                                                                   | 6  | 0 | -1.619735 | -0.486706 | -0.072918 |
| 20                                                         | 16 | 0 | 2.510365  | -1.088354 | -0.008648 | 20                                                                                     | 16 | 0 | -2.531264 | 1.112200  | -0.025637 | 20                                                                                   | 16 | 0 | -2.506373 | 1.070963  | -0.056072 |
| 21                                                         | 6  | 0 | 4.039151  | -0.215751 | -0.008641 | 21                                                                                     | 6  | 0 | -4.042386 | 0.239329  | -0.015347 | 21                                                                                   | 6  | 0 | -4.047771 | 0.194581  | -0.039257 |
| 22                                                         | 6  | 0 | 3.828166  | 1.175622  | -0.004517 | 22                                                                                     | 6  | 0 | -3.822402 | -1.158617 | -0.001232 | 22                                                                                   | 6  | 0 | -3.837989 | -1.198003 | -0.052014 |
| 23                                                         | 7  | 0 | 2.478978  | 1.514367  | -0.002015 | 23                                                                                     | 7  | 0 | -2.477544 | -1.477483 | 0.000113  | 23                                                                                   | 7  | 0 | -2.495835 | -1.552912 | -0.073983 |
| 24                                                         | 6  | 0 | 5.326199  | -0.752644 | -0.012192 | 24                                                                                     | 6  | 0 | -5.334162 | 0.770380  | -0.018754 | 24                                                                                   | 6  | 0 | -5.328460 | 0.732458  | -0.017712 |
| 25                                                         | 6  | 0 | 4.911839  | 2.064707  | -0.003513 | 25                                                                                     | 6  | 0 | -4.900648 | -2.061010 | 0.010521  | 25                                                                                   | 6  | 0 | -4.930103 | -2.073016 | -0.045275 |
| 26                                                         | 6  | 0 | 6.194762  | 1.532200  | -0.006406 | 26                                                                                     | 6  | 0 | -6.177757 | -1.532987 | 0.008924  | 26                                                                                   | 6  | 0 | -6.219388 | -1.536796 | -0.023306 |
| 27                                                         | 6  | 0 | 6.396057  | 0.138838  | -0.011739 | 27                                                                                     | 6  | 0 | -6.387800 | -0.132518 | -0.005937 | 27                                                                                   | 6  | 0 | -6.416061 | -0.150628 | -0.012232 |

|    |    |   |           |           |           |    |    |   |           |           |           |    |    |   |           |           |           |
|----|----|---|-----------|-----------|-----------|----|----|---|-----------|-----------|-----------|----|----|---|-----------|-----------|-----------|
| 28 | 1  | 0 | 5.494018  | -1.824205 | -0.017152 | 28 | 1  | 0 | -5.511669 | 1.840231  | -0.031610 | 28 | 1  | 0 | -5.486305 | 1.806163  | -0.011563 |
| 29 | 16 | 0 | 8.093065  | -0.494397 | 0.003480  | 29 | 16 | 0 | -8.096191 | 0.482138  | 0.009200  | 29 | 16 | 0 | -8.093520 | 0.506878  | 0.093156  |
| 30 | 1  | 0 | 7.047303  | 2.204325  | -0.007289 | 30 | 1  | 0 | -7.029958 | -2.205119 | 0.017286  | 30 | 1  | 0 | -7.072848 | -2.207614 | -0.021273 |
| 31 | 1  | 0 | 4.757680  | 3.138222  | -0.001234 | 31 | 1  | 0 | -4.737414 | -3.132675 | 0.020538  | 31 | 1  | 0 | -4.785520 | -3.148325 | -0.058854 |
| 32 | 8  | 0 | 8.773547  | 0.164122  | -1.155844 | 32 | 8  | 0 | -8.748619 | -0.176174 | -1.162643 | 32 | 8  | 0 | -8.948916 | -0.407625 | -0.729337 |
| 33 | 8  | 0 | 8.662357  | -0.072796 | 1.323062  | 33 | 8  | 0 | -8.648883 | 0.027455  | 1.321581  | 33 | 8  | 0 | -8.462300 | 0.476937  | 1.548692  |
| 34 | 8  | 0 | 7.980836  | -1.977290 | -0.141676 | 34 | 8  | 0 | -7.995594 | 1.964611  | -0.115597 | 34 | 8  | 0 | -8.030156 | 1.900278  | -0.452773 |
| 35 | 6  | 0 | -2.015674 | -2.908111 | -0.000481 | 35 | 6  | 0 | 1.995681  | 2.872729  | 0.014903  | 35 | 6  | 0 | 2.050000  | 2.944014  | -0.083683 |
| 36 | 1  | 0 | -0.928034 | -2.917341 | -0.002586 | 36 | 1  | 0 | 0.908904  | 2.872933  | 0.011869  | 36 | 1  | 0 | 0.961737  | 2.962267  | -0.115499 |
| 37 | 1  | 0 | -2.390486 | -3.411061 | 0.894835  | 37 | 1  | 0 | 2.373708  | 3.356501  | 0.918114  | 37 | 1  | 0 | 2.394093  | 3.455865  | 0.821461  |
| 38 | 1  | 0 | -2.393911 | -3.408769 | -0.895607 | 38 | 1  | 0 | 2.378851  | 3.376797  | -0.874943 | 38 | 1  | 0 | 2.445868  | 3.458482  | -0.965549 |
| 39 | 6  | 0 | 2.015701  | 2.908152  | 0.001074  | 39 | 6  | 0 | -1.995712 | -2.872763 | 0.014959  | 39 | 6  | 0 | -2.050036 | -2.944035 | -0.083638 |
| 40 | 1  | 0 | 2.394120  | 3.408703  | 0.896182  | 40 | 1  | 0 | -2.373803 | -3.356471 | 0.918179  | 40 | 1  | 0 | -2.395814 | -3.456513 | 0.820495  |
| 41 | 1  | 0 | 2.390322  | 3.411211  | -0.894262 | 41 | 1  | 0 | -2.378843 | -3.376879 | -0.874875 | 41 | 1  | 0 | -2.444332 | -3.457875 | -0.966593 |
| 42 | 1  | 0 | 0.928062  | 2.917376  | 0.003411  | 42 | 1  | 0 | -0.908935 | -2.872981 | 0.011995  | 42 | 1  | 0 | -0.961718 | -2.962307 | -0.113438 |

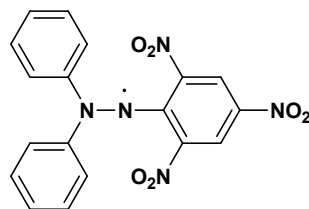

| Initial molecule <b>DPPH•</b><br>$E_{EL} = -1417.95271530$ a.u. |   |   |           |           |           | Radical cation <b>DPPH•+</b> with 1 e <sup>-</sup> less<br>$E_{EL} = -1417.76345342$ a.u. |   |   |           |           |           | Radical anion <b>DPPH•-</b> with 1 e <sup>-</sup> more<br>$E_{EL} = -1418.12281440$ a.u. |   |   |           |           |           |
|-----------------------------------------------------------------|---|---|-----------|-----------|-----------|-------------------------------------------------------------------------------------------|---|---|-----------|-----------|-----------|------------------------------------------------------------------------------------------|---|---|-----------|-----------|-----------|
| Cartesian Coordinates                                           |   |   |           |           |           | Cartesian Coordinates                                                                     |   |   |           |           |           | Cartesian Coordinates                                                                    |   |   |           |           |           |
| 1                                                               | 6 | 0 | 2.592565  | -0.748387 | 0.968872  | 1                                                                                         | 6 | 0 | 2.711414  | 0.646761  | -1.083335 | 1                                                                                        | 6 | 0 | 2.556176  | 0.752683  | -0.714249 |
| 2                                                               | 1 | 0 | 2.931042  | -1.588263 | 1.562909  | 2                                                                                         | 1 | 0 | 3.140044  | 1.439510  | -1.684506 | 2                                                                                        | 1 | 0 | 2.958967  | 1.647362  | -1.172741 |
| 3                                                               | 6 | 0 | 3.508677  | 0.095709  | 0.347703  | 3                                                                                         | 6 | 0 | 3.512858  | -0.188849 | -0.318056 | 3                                                                                        | 6 | 0 | 3.395871  | -0.113299 | 0.000740  |
| 4                                                               | 6 | 0 | 3.084256  | 1.234599  | -0.345258 | 4                                                                                         | 6 | 0 | 2.985619  | -1.238463 | 0.420194  | 4                                                                                        | 6 | 0 | 2.949353  | -1.407293 | 0.362837  |
| 5                                                               | 6 | 0 | 1.731246  | 1.466983  | -0.460516 | 5                                                                                         | 6 | 0 | 1.608768  | -1.416751 | 0.414269  | 5                                                                                        | 6 | 0 | 1.636694  | -1.744842 | 0.166329  |
| 6                                                               | 6 | 0 | 0.714036  | 0.629908  | 0.111152  | 6                                                                                         | 6 | 0 | 0.731396  | -0.577551 | -0.308511 | 6                                                                                        | 6 | 0 | 0.624856  | -0.759074 | -0.250714 |
| 7                                                               | 6 | 0 | 1.236843  | -0.468460 | 0.882108  | 7                                                                                         | 6 | 0 | 1.339306  | 0.431161  | -1.092285 | 7                                                                                        | 6 | 0 | 1.235222  | 0.406528  | -0.916797 |
| 8                                                               | 7 | 0 | 4.920616  | -0.190694 | 0.448024  | 8                                                                                         | 7 | 0 | 4.965302  | 0.035732  | -0.304913 | 8                                                                                        | 7 | 0 | 4.746323  | 0.249246  | 0.224802  |
| 9                                                               | 1 | 0 | 3.798963  | 1.898807  | -0.815723 | 9                                                                                         | 1 | 0 | 3.619872  | -1.897668 | 1.000111  | 9                                                                                        | 1 | 0 | 3.651250  | -2.138241 | 0.743187  |
| 10                                                              | 7 | 0 | 1.348854  | 2.617165  | -1.286836 | 10                                                                                        | 7 | 0 | 1.070556  | -2.519018 | 1.218113  | 10                                                                                       | 7 | 0 | 1.267522  | -3.114501 | 0.428509  |
| 11                                                              | 7 | 0 | -0.564901 | 1.023271  | -0.063372 | 11                                                                                        | 7 | 0 | -0.626761 | -0.918641 | -0.378741 | 11                                                                                       | 7 | 0 | -0.604820 | -0.970970 | 0.141406  |
| 12                                                              | 7 | 0 | 0.386261  | -1.249103 | 1.770863  | 12                                                                                        | 7 | 0 | 0.553190  | 1.263790  | -2.014800 | 12                                                                                       | 7 | 0 | 0.523269  | 1.096402  | -1.939362 |
| 13                                                              | 8 | 0 | 0.720257  | -2.410398 | 2.033220  | 13                                                                                        | 8 | 0 | 1.027687  | 2.344546  | -2.352775 | 13                                                                                       | 8 | 0 | 0.940805  | 2.201451  | -2.356612 |
| 14                                                              | 8 | 0 | -0.603128 | -0.695630 | 2.263181  | 14                                                                                        | 8 | 0 | -0.522402 | 0.817370  | -2.416233 | 14                                                                                       | 8 | 0 | -0.491767 | 0.549293  | -2.415281 |
| 15                                                              | 8 | 0 | 0.443994  | 2.483166  | -2.110556 | 15                                                                                        | 8 | 0 | -0.131869 | -2.500737 | 1.490916  | 15                                                                                       | 8 | 0 | 0.327550  | -3.612374 | -0.207681 |
| 16                                                              | 8 | 0 | 1.989374  | 3.661158  | -1.130589 | 16                                                                                        | 8 | 0 | 1.848205  | -3.401918 | 1.573292  | 16                                                                                       | 8 | 0 | 1.916553  | -3.759510 | 1.273954  |
| 17                                                              | 8 | 0 | 5.718692  | 0.597597  | -0.078155 | 17                                                                                        | 8 | 0 | 5.658698  | -0.736779 | 0.355416  | 17                                                                                       | 8 | 0 | 5.514999  | -0.575801 | 0.767792  |
| 18                                                              | 8 | 0 | 5.275319  | -1.212060 | 1.052794  | 18                                                                                        | 8 | 0 | 5.404002  | 0.984966  | -0.953226 | 18                                                                                       | 8 | 0 | 5.138189  | 1.388377  | -0.113971 |
| 19                                                              | 7 | 0 | -1.573459 | 0.158150  | -0.120522 | 19                                                                                        | 7 | 0 | -1.553409 | -0.172833 | 0.045952  | 19                                                                                       | 7 | 0 | -1.572710 | -0.000933 | 0.058036  |
| 20                                                              | 6 | 0 | -2.849911 | 0.674799  | 0.235955  | 20                                                                                        | 6 | 0 | -2.886929 | -0.564706 | -0.286956 | 20                                                                                       | 6 | 0 | -2.895900 | -0.508277 | 0.055458  |
| 21                                                              | 6 | 0 | -1.441822 | -1.140124 | -0.732744 | 21                                                                                        | 6 | 0 | -1.354922 | 1.029294  | 0.838557  | 21                                                                                       | 6 | 0 | -1.306333 | 1.342232  | 0.495887  |
| 22                                                              | 6 | 0 | -2.931119 | 1.642260  | 1.251544  | 22                                                                                        | 6 | 0 | -3.111081 | -1.260813 | -1.487592 | 22                                                                                       | 6 | 0 | -3.157143 | -1.730140 | -0.593135 |
| 23                                                              | 6 | 0 | -4.173073 | 2.172940  | 1.593910  | 23                                                                                        | 6 | 0 | -4.405438 | -1.663937 | -1.789502 | 23                                                                                       | 6 | 0 | -4.449932 | -2.256314 | -0.606891 |
| 24                                                              | 6 | 0 | -5.332316 | 1.746795  | 0.934269  | 24                                                                                        | 6 | 0 | -5.456038 | -1.386704 | -0.902444 | 24                                                                                       | 6 | 0 | -5.506158 | -1.574698 | 0.007578  |
| 25                                                              | 6 | 0 | -5.242603 | 0.784028  | -0.077674 | 25                                                                                        | 6 | 0 | -5.215684 | -0.699151 | 0.292900  | 25                                                                                       | 6 | 0 | -5.246956 | -0.357420 | 0.646695  |
| 26                                                              | 6 | 0 | -4.007677 | 0.243948  | -0.433554 | 26                                                                                        | 6 | 0 | -3.929172 | -0.275136 | 0.610937  | 26                                                                                       | 6 | 0 | -3.956114 | 0.174381  | 0.679966  |
| 27                                                              | 1 | 0 | -2.032496 | 1.956255  | 1.771257  | 27                                                                                        | 1 | 0 | -2.292548 | -1.446617 | -2.173906 | 27                                                                                       | 1 | 0 | -2.347740 | -2.255162 | -1.089042 |

|    |   |   |           |           |           |    |   |   |           |           |           |    |   |   |           |           |           |
|----|---|---|-----------|-----------|-----------|----|---|---|-----------|-----------|-----------|----|---|---|-----------|-----------|-----------|
| 28 | 1 | 0 | -4.236063 | 2.914467  | 2.385879  | 28 | 1 | 0 | -4.601125 | -2.183659 | -2.722637 | 28 | 1 | 0 | -4.631269 | -3.201237 | -1.114112 |
| 29 | 1 | 0 | -6.298787 | 2.162387  | 1.206735  | 29 | 1 | 0 | -6.465464 | -1.705616 | -1.146945 | 29 | 1 | 0 | -6.513205 | -1.983424 | -0.012640 |
| 30 | 1 | 0 | -6.136213 | 0.457832  | -0.602955 | 30 | 1 | 0 | -6.029512 | -0.499112 | 0.983107  | 30 | 1 | 0 | -6.052501 | 0.183447  | 1.138171  |
| 31 | 1 | 0 | -3.943615 | -0.483593 | -1.235443 | 31 | 1 | 0 | -3.732613 | 0.231554  | 1.549217  | 31 | 1 | 0 | -3.777997 | 1.110374  | 1.198225  |
| 32 | 6 | 0 | -2.050403 | -2.254100 | -0.139220 | 32 | 6 | 0 | -1.976943 | 2.209601  | 0.407669  | 32 | 6 | 0 | -1.823795 | 2.428305  | -0.222191 |
| 33 | 6 | 0 | -1.923895 | -3.503144 | -0.747277 | 33 | 6 | 0 | -1.773473 | 3.372196  | 1.147621  | 33 | 6 | 0 | -1.597916 | 3.731417  | 0.225925  |
| 34 | 6 | 0 | -1.198980 | -3.640385 | -1.936208 | 34 | 6 | 0 | -0.992755 | 3.340390  | 2.308844  | 34 | 6 | 0 | -0.842849 | 3.960679  | 1.381490  |
| 35 | 6 | 0 | -0.601639 | -2.519912 | -2.524093 | 35 | 6 | 0 | -0.404811 | 2.144289  | 2.736663  | 35 | 6 | 0 | -0.323511 | 2.874906  | 2.094568  |
| 36 | 6 | 0 | -0.720875 | -1.264053 | -1.928691 | 36 | 6 | 0 | -0.573449 | 0.974165  | 1.999292  | 36 | 6 | 0 | -0.559502 | 1.568112  | 1.661372  |
| 37 | 1 | 0 | -2.600630 | -2.146439 | 0.790069  | 37 | 1 | 0 | -2.575783 | 2.219894  | -0.496866 | 37 | 1 | 0 | -2.396495 | 2.249783  | -1.127364 |
| 38 | 1 | 0 | -2.386699 | -4.370468 | -0.284466 | 38 | 1 | 0 | -2.228081 | 4.301139  | 0.816665  | 38 | 1 | 0 | -2.002048 | 4.568312  | -0.338279 |
| 39 | 1 | 0 | -1.102417 | -4.616242 | -2.404608 | 39 | 1 | 0 | -0.848740 | 4.248664  | 2.887346  | 39 | 1 | 0 | -0.659954 | 4.976606  | 1.722455  |
| 40 | 1 | 0 | -0.050669 | -2.618348 | -3.455477 | 40 | 1 | 0 | 0.178326  | 2.116575  | 3.652296  | 40 | 1 | 0 | 0.258712  | 3.041780  | 2.997578  |
| 41 | 1 | 0 | -0.279948 | -0.389006 | -2.396117 | 41 | 1 | 0 | -0.153084 | 0.037762  | 2.348128  | 41 | 1 | 0 | -0.167836 | 0.726885  | 2.225987  |



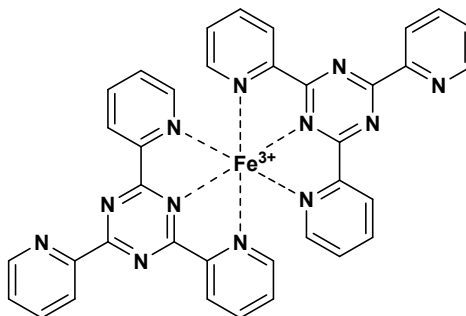

| Initial molecule <b>FRAP</b><br>$E_{EL} = -3306.72258380$ a.u. |    |   |           |           |           | Radical anion <b>FRAP<sup>•-</sup></b> with 1 e <sup>-</sup> more<br>$E_{EL} = -3306.92783800$ a.u. |    |   |           |           |           |
|----------------------------------------------------------------|----|---|-----------|-----------|-----------|-----------------------------------------------------------------------------------------------------|----|---|-----------|-----------|-----------|
| Cartesian Coordinates                                          |    |   |           |           |           | Cartesian Coordinates                                                                               |    |   |           |           |           |
| 1                                                              | 26 | 0 | -0.000540 | 0.079091  | 0.000185  | 1                                                                                                   | 26 | 0 | -0.000045 | 0.005916  | 0.016362  |
| 2                                                              | 7  | 0 | 1.895039  | 0.030893  | -0.038008 | 2                                                                                                   | 7  | 0 | -1.891677 | 0.000940  | 0.009560  |
| 3                                                              | 7  | 0 | 0.426122  | 1.511123  | 1.344768  | 3                                                                                                   | 7  | 0 | -0.361507 | -1.472497 | -1.339129 |
| 4                                                              | 7  | 0 | 0.288024  | -1.296876 | -1.463075 | 4                                                                                                   | 7  | 0 | -0.378659 | 1.481924  | 1.367450  |
| 5                                                              | 6  | 0 | 1.606424  | -1.591601 | -1.694382 | 5                                                                                                   | 7  | 0 | 0.369636  | 1.360556  | -1.460868 |
| 6                                                              | 6  | 0 | 2.537673  | -0.809005 | -0.865267 | 6                                                                                                   | 7  | 0 | 0.370376  | -1.344674 | 1.494845  |
| 7                                                              | 6  | 0 | 1.761811  | 1.696800  | 1.583116  | 7                                                                                                   | 7  | 0 | 1.891437  | 0.008789  | 0.017614  |
| 8                                                              | 6  | 0 | -0.462262 | 2.253012  | 2.017470  | 8                                                                                                   | 6  | 0 | -2.589190 | 0.848692  | 0.782510  |
| 9                                                              | 1  | 0 | -1.510801 | 2.089659  | 1.796417  | 9                                                                                                   | 6  | 0 | -2.578234 | -0.846219 | -0.773278 |
| 10                                                             | 6  | 0 | 2.618580  | 0.830716  | 0.761332  | 10                                                                                                  | 6  | 0 | -1.689093 | -1.711987 | -1.564342 |
| 11                                                             | 6  | 0 | 2.000941  | -2.536229 | -2.629194 | 11                                                                                                  | 6  | 0 | -1.709007 | 1.715693  | 1.582421  |
| 12                                                             | 1  | 0 | 3.056508  | -2.736757 | -2.778533 | 12                                                                                                  | 6  | 0 | 2.584101  | -0.771151 | 0.862806  |
| 13                                                             | 6  | 0 | 2.226865  | 2.621898  | 2.506701  | 13                                                                                                  | 6  | 0 | 2.582945  | 0.782453  | -0.834135 |
| 14                                                             | 1  | 0 | 3.294314  | 2.734932  | 2.663283  | 14                                                                                                  | 6  | 0 | 1.699520  | -1.563805 | 1.731842  |
| 15                                                             | 6  | 0 | -0.062236 | 3.201379  | 2.962843  | 15                                                                                                  | 6  | 0 | 1.698443  | 1.579624  | -1.699003 |
| 16                                                             | 1  | 0 | -0.819884 | 3.776815  | 3.484349  | 16                                                                                                  | 6  | 0 | 0.533272  | -2.208921 | -2.012130 |
| 17                                                             | 6  | 0 | -0.649578 | -1.942484 | -2.167623 | 17                                                                                                  | 6  | 0 | 0.158004  | -3.198159 | -2.924773 |
| 18                                                             | 1  | 0 | -1.683317 | -1.689632 | -1.965521 | 18                                                                                                  | 6  | 0 | -1.195143 | -3.438511 | -3.151743 |
| 19                                                             | 6  | 0 | -0.322399 | -2.907536 | -3.124381 | 19                                                                                                  | 6  | 0 | -2.138486 | -2.679702 | -2.456563 |
| 20                                                             | 1  | 0 | -1.120485 | -3.402422 | -3.667580 | 20                                                                                                  | 1  | 0 | 1.580239  | -2.002770 | -1.817843 |
| 21                                                             | 6  | 0 | 1.014762  | -3.209313 | -3.358762 | 21                                                                                                  | 1  | 0 | 0.927464  | -3.762492 | -3.441903 |
| 22                                                             | 1  | 0 | 1.294853  | -3.954086 | -4.097041 | 22                                                                                                  | 1  | 0 | -1.514432 | -4.200663 | -3.856139 |
| 23                                                             | 6  | 0 | 1.294203  | 3.387241  | 3.213071  | 23                                                                                                  | 1  | 0 | -3.203746 | -2.828181 | -2.597745 |

|    |   |   |           |           |           |    |   |   |           |           |           |
|----|---|---|-----------|-----------|-----------|----|---|---|-----------|-----------|-----------|
| 24 | 1 | 0 | 1.628215  | 4.117791  | 3.943117  | 24 | 6 | 0 | 0.507859  | 2.220923  | 2.048293  |
| 25 | 7 | 0 | -1.895289 | 0.032061  | 0.039069  | 25 | 6 | 0 | 0.121289  | 3.207320  | 2.959385  |
| 26 | 7 | 0 | -0.426416 | 1.518379  | -1.336921 | 26 | 6 | 0 | -1.234624 | 3.441844  | 3.175989  |
| 27 | 7 | 0 | -0.287213 | -1.307359 | 1.453996  | 27 | 6 | 0 | -2.169539 | 2.680534  | 2.472080  |
| 28 | 6 | 0 | -1.605870 | -1.602742 | 1.683867  | 28 | 1 | 0 | 1.556900  | 2.018286  | 1.861825  |
| 29 | 6 | 0 | -2.537439 | -0.813894 | 0.860568  | 29 | 1 | 0 | 0.884274  | 3.773915  | 3.483611  |
| 30 | 6 | 0 | -1.762196 | 1.707774  | -1.571911 | 30 | 1 | 0 | -1.562585 | 4.201470  | 3.879129  |
| 31 | 6 | 0 | 0.461980  | 2.264034  | -2.005358 | 31 | 1 | 0 | -3.236643 | 2.823826  | 2.604558  |
| 32 | 1 | 0 | 1.510610  | 2.097413  | -1.787310 | 32 | 6 | 0 | 2.152929  | 2.470478  | -2.665575 |
| 33 | 6 | 0 | -2.618871 | 0.836247  | -0.755932 | 33 | 6 | 0 | 1.213523  | 3.171235  | -3.424216 |
| 34 | 6 | 0 | -2.000554 | -2.554077 | 2.611692  | 34 | 6 | 0 | -0.140888 | 2.950509  | -3.185224 |
| 35 | 1 | 0 | -3.056157 | -2.755366 | 2.759823  | 35 | 6 | 0 | -0.521220 | 2.038465  | -2.197342 |
| 36 | 6 | 0 | -2.227341 | 2.641036  | -2.487194 | 36 | 1 | 0 | 3.218991  | 2.606549  | -2.813133 |
| 37 | 1 | 0 | -3.294874 | 2.757099  | -2.641000 | 37 | 1 | 0 | 1.536815  | 3.874993  | -4.185272 |
| 38 | 6 | 0 | 0.061859  | 3.220728  | -2.942303 | 38 | 1 | 0 | -0.907423 | 3.472396  | -3.749160 |
| 39 | 1 | 0 | 0.819502  | 3.799307  | -3.460328 | 39 | 1 | 0 | -1.569051 | 1.848885  | -1.991517 |
| 40 | 6 | 0 | 0.650156  | -1.958049 | 2.153944  | 40 | 6 | 0 | 2.155172  | -2.451786 | 2.700510  |
| 41 | 1 | 0 | 1.684076  | -1.704633 | 1.953513  | 41 | 6 | 0 | 1.216468  | -3.149516 | 3.462753  |
| 42 | 6 | 0 | 0.322754  | -2.929804 | 3.103914  | 42 | 6 | 0 | -0.138217 | -2.929012 | 3.224851  |
| 43 | 1 | 0 | 1.120686  | -3.428863 | 3.643509  | 43 | 6 | 0 | -0.519873 | -2.020054 | 2.234595  |
| 44 | 6 | 0 | -1.014439 | -3.233019 | 3.336025  | 44 | 1 | 0 | 3.221554  | -2.587383 | 2.846299  |
| 45 | 1 | 0 | -1.294677 | -3.983470 | 4.068480  | 45 | 1 | 0 | 1.540566  | -3.850746 | 4.225792  |
| 46 | 6 | 0 | -1.294680 | 3.410954  | -3.188516 | 46 | 1 | 0 | -0.904092 | -3.448255 | 3.792135  |
| 47 | 1 | 0 | -1.628767 | 4.148399  | -3.911562 | 47 | 1 | 0 | -1.568066 | -1.830443 | 2.030506  |
| 48 | 7 | 0 | -3.939871 | 0.810831  | -0.772937 | 48 | 7 | 0 | 3.908184  | 0.804706  | -0.870941 |
| 49 | 7 | 0 | -3.854586 | -0.900452 | 0.900620  | 49 | 7 | 0 | 3.909875  | -0.807573 | 0.891868  |
| 50 | 6 | 0 | -4.526155 | -0.076792 | 0.063349  | 50 | 6 | 0 | 4.537300  | -0.006289 | 0.007132  |
| 51 | 6 | 0 | -6.006442 | -0.141664 | 0.054018  | 51 | 6 | 0 | 6.025215  | -0.006661 | -0.017127 |
| 52 | 7 | 0 | -6.580211 | -1.030626 | 0.890306  | 52 | 7 | 0 | 6.650231  | -0.839991 | 0.837741  |
| 53 | 6 | 0 | -7.911545 | -1.109732 | 0.895798  | 53 | 6 | 0 | 7.985772  | -0.857897 | 0.830784  |
| 54 | 6 | 0 | -8.736004 | -0.320132 | 0.081405  | 54 | 6 | 0 | 8.765248  | -0.058577 | -0.014210 |
| 55 | 6 | 0 | -8.138115 | 0.596553  | -0.779457 | 55 | 6 | 0 | 8.114560  | 0.801838  | -0.895859 |
| 56 | 6 | 0 | -6.745795 | 0.691617  | -0.797399 | 56 | 6 | 0 | 6.719540  | 0.831271  | -0.901156 |
| 57 | 1 | 0 | -8.347973 | -1.834710 | 1.579375  | 57 | 1 | 0 | 8.460353  | -1.541762 | 1.531457  |
| 58 | 1 | 0 | -9.815225 | -0.430905 | 0.130502  | 58 | 1 | 0 | 9.849020  | -0.116953 | 0.026011  |
| 59 | 1 | 0 | -8.738910 | 1.228270  | -1.427445 | 59 | 1 | 0 | 8.678170  | 1.440867  | -1.569983 |
| 60 | 1 | 0 | -6.244076 | 1.392177  | -1.454374 | 60 | 1 | 0 | 6.179766  | 1.487469  | -1.573591 |
| 61 | 7 | 0 | 3.939645  | 0.806386  | 0.777486  | 61 | 7 | 0 | -3.903289 | -0.877545 | -0.809067 |

|    |   |   |          |           |           |    |   |   |           |           |           |
|----|---|---|----------|-----------|-----------|----|---|---|-----------|-----------|-----------|
| 62 | 7 | 0 | 3.854891 | -0.894797 | -0.906066 | 62 | 7 | 0 | -3.915088 | 0.882449  | 0.806119  |
| 63 | 6 | 0 | 4.526292 | -0.076049 | -0.063806 | 63 | 6 | 0 | -4.537343 | 0.002715  | -0.004488 |
| 64 | 6 | 0 | 6.006673 | -0.141010 | -0.054273 | 64 | 6 | 0 | -6.025086 | -0.010491 | -0.025771 |
| 65 | 7 | 0 | 6.580767 | -1.024326 | -0.896261 | 65 | 7 | 0 | -6.655692 | 0.879860  | 0.764971  |
| 66 | 6 | 0 | 7.912148 | -1.103013 | -0.902174 | 66 | 6 | 0 | -7.991381 | 0.884217  | 0.761901  |
| 67 | 6 | 0 | 8.736297 | -0.318600 | -0.082505 | 67 | 6 | 0 | -8.765429 | 0.015379  | -0.016861 |
| 68 | 6 | 0 | 8.138044 | 0.592182  | 0.784359  | 68 | 6 | 0 | -8.108937 | -0.903333 | -0.832983 |
| 69 | 6 | 0 | 6.745690 | 0.686781  | 0.802742  | 69 | 6 | 0 | -6.713749 | -0.920021 | -0.840848 |
| 70 | 1 | 0 | 8.348830 | -1.823329 | -1.590498 | 70 | 1 | 0 | -8.470546 | 1.614521  | 1.410650  |
| 71 | 1 | 0 | 9.815554 | -0.428705 | -0.132258 | 71 | 1 | 0 | -9.849603 | 0.066033  | 0.023038  |
| 72 | 1 | 0 | 8.738574 | 1.219770  | 1.436597  | 72 | 1 | 0 | -8.668256 | -1.597281 | -1.454310 |
| 73 | 1 | 0 | 6.243731 | 1.382946  | 1.464186  | 73 | 1 | 0 | -6.169597 | -1.621273 | -1.462334 |

## REFERENCES

---

- 1 I. Boček, K. Starčević, I. Novak Jovanović, R. Vianello and M. Hranjec, *J. Mol. Liq.*, 2021, **342**, 117527. Doi: 10.1016/j.molliq.2021.117527.
- 2 M. Cindrić, I. Sović, M. Mioč, L. Hok, I. Boček, P. Roškarić, K. Butković, I. Martin-Kleiner, K. Starčević, R. Vianello, M. Kralj and M. Hranjec, *Antioxidants*, 2019, **8**, 477. Doi: 10.3390/antiox8100477
- 3 N. Perin, P. Roškarić, I. Sović, I. Boček, K. Starčević, M. Hranjec and R. Vianello, *Chem. Res. Toxicol.*, 2018, **31**, 974-984. Doi: 10.1021/acs.chemrestox.8b00175
- 4 G. Serdaroğlu, N. Uludağ, E. Ercag, P. Sugumar and P. Rajkumar, *J. Mol. Liq.*, 2021, **330**, 115651. Doi: 10.1016/j.molliq.2021.115651
- 5 A. A. Altalhi, H. E. Hashem, N. A. Negm, E. A. Mohamed and E. M. Azmy, *J. Mol. Liq.*, 2021, **333**, 115977. Doi: 10.1016/j.molliq.2021.115977
- 6 M. Toma, L. Božičević, J. Lapić, S. Đaković, D. Šakić, T. Tandarić, R. Vianello and V. Vrček, *J. Org. Chem.*, 2019, **84**, 12471-12480. Doi: 10.1021/acs.joc.9b01944
- 4 A. Alizadeh, A. Bagherinejad, J. Kayanian and R. Vianello, *New J. Chem.*, 2022, **46**, 7242-7252. Doi: 10.1039/D1NJ06208E
- 8 E. Mehić, L. Hok, Q. Wang, I. Dokli, M. Svetec Miklenić, Z. Findrik Blažević, L. Tang, R. Vianello and M. Majerić Elenkov, *Adv. Synth. Catal.*, 2022, **364**, 2576-2588. Doi: 10.1002/adsc.202200342
- 5 T. Tandarić and R. Vianello, *ACS Chem. Neurosci.*, 2019, **10**, 3532-3542. Doi: 10.1021/acchemneuro.9b00147
- 10 Gaussian 16, Revision C.01, M. J. Frisch, G. W. Trucks, H. B. Schlegel, G. E. Scuseria, M. A. Robb, J. R. Cheeseman, G. Scalmani, V. Barone, G. A. Petersson, H. Nakatsuji, X. Li, M. Caricato, A. V. Marenich, J. Bloino, B. G. Janesko, R. Gomperts, B. Mennucci, H. P. Hratchian, J. V. Ortiz, A. F. Izmaylov, J. L. Sonnenberg, D. Williams-Young, F. Ding, F. Lipparini, F. Egidi, J. Goings, B. Peng, A. Petrone, T. Henderson, D. Ranasinghe, V. G. Zakrzewski, J. Gao, N. Rega, G. Zheng, W. Liang, M. Hada, M. Ehara, K. Toyota, R. Fukuda, J. Hasegawa, M. Ishida, T. Nakajima, Y. Honda, O. Kitao, H. Nakai, T. Vreven, K. Throssell, J. A. Montgomery, Jr., J. E. Peralta, F. Ogliaro, M. J. Bearpark, J. J. Heyd, E. N. Brothers, K. N. Kudin, V. N. Staroverov, T. A. Keith, R. Kobayashi, J. Normand, K. Raghavachari, A. P. Rendell, J. C. Burant, S. S. Iyengar, J. Tomasi, M. Cossi, J. M. Millam, M. Klene, C. Adamo, R. Cammi, J. W. Ochterski, R. L. Martin, K. Morokuma, O. Farkas, J. B. Foresman and D. J. Fox, Gaussian, Inc., Wallingford CT, 2016
- 11 D. Huang, B. Ou and R. L. Prior, *J. Agric. Food Chem.*, 2005, **53**, 1841-1856. Doi: 10.1021/jf030723c
- 12 C. Hu, G. You, J. Liu, S. Du, X. Zhao and S. Wu, *J. Mol. Liq.*, 2021, **324**, 115099. Doi: 10.1016/j.molliq.2020.115099
- 13 A. Benayahoum, S. Bouakkaz, T. Bordjiba and M. Abdaoui, *J. Mol. Liq.*, 2019, **275**, 221-231. Doi: 10.1016/j.molliq.2018.11.092
- 14 Z. Marković, J. Tošović, D. Milenković and S. Marković, *Comput. Theor. Chem.*, 2016, **1077**, 11-17. Doi: 10.1016/j.comptc.2015.11.005
